# Supplementary material for: Critical Evaluation of Two Qualitative Analytical Approaches for Multiclass Determination of Veterinary Drugs in Bovine Muscle Using UHPLC-Q-Orbitrap: The Wind of Change in Brazilian Monitoring
Source: MDPI journal article supplement (doi:10.3390/molecules28104150), 2023-05-17

# Critical Evaluation of Two Qualitative Analytical Approaches for Multiclass Determination of Veterinary Drugs in Bovine Muscle Using UHPLC-Q-Orbitrap: The Wind of Change in Brazilian Monitoring

Ramon Alves de Oliveira Paula <sup>1,\*</sup>, Carina de Souza Gondim <sup>1</sup>, Eduardo Morgado Schmidt <sup>2</sup>, Maria Helena Glicério Marcelina Diniz <sup>3</sup>, Mary Ane Gonçalves Lana <sup>3</sup> and Leandro Soares de Oliveira <sup>1,4,\*</sup>

<sup>1</sup> Postgraduate Program in Food Science, Department of Food Science (ALM), Faculty of Pharmacy (FAFAR), Federal University of Minas Gerais (UFMG), Campus da UFMG, Antônio Carlos Avenue 6627, Belo Horizonte 31270-010, Brazil; carinasgondim@gmail.com

<sup>2</sup> Nova Analítica Importações e Exportações LTDA, Assungui Street, 432, Vila Gumerindo, São Paulo 04131-000, Brazil; eduardoschmidt@yahoo.com

<sup>3</sup> Food of the Agricultural Defense Federal Laboratory of Minas Gerais, Ministry of Agriculture and Livestock, Rômulo Joviano Avenue, s/nº, Centro, Pedro Leopoldo 33600-000, Brazil; maria.diniz@agricultura.gov.br (M.H.G.M.D.); mary.lana@agricultura.gov.br (M.A.G.L.)

<sup>4</sup> Department of Mechanical Engineering, Engineering School, Federal University of Minas Gerais (UFMG), Campus da UFMG, Antônio Carlos Avenue 6627, Belo Horizonte 31270-010, Brazil

\* Correspondence: alvesfarmacia@yahoo.com.br (R.A.d.O.P.); leandro@demec.ufmg.br (L.S.d.O.); Tel.: +55-31-3409-3517 (L.S.d.O.)

## Table of contents

|                                                                                                                                                           |     |
|-----------------------------------------------------------------------------------------------------------------------------------------------------------|-----|
| Table S1. Concentration of the standard solution, maximum residue limit (MRL), minimum required performance level (MRPL) in bovine muscle.....            | 3   |
| Table S2. Chromatographic conditions of the different methods evaluated for the Accela 1,250 Pump UHPLC system.....                                       | 8   |
| Table S3. Mass spectrometer conditions of different methods evaluated for the Q-Exactive Orbitrap HRMS system.....                                        | 9   |
| Table S4. Physicochemical properties of veterinary drugs and the main conditions determined by Q-Exactive Orbitrap HRMS.....                              | 10  |
| Table S5. Retention time of veterinary drugs and their metabolites evaluated by Q-Exactive Orbitrap HRMS.....                                             | 168 |
| Figure S1. General flowchart of the sample preparation procedure according to method A.....                                                               | 174 |
| Figure S2. General flowchart of the sample preparation procedure according to method B.....                                                               | 175 |
| Figure S3. Analyte identification criteria.....                                                                                                           | 176 |
| Figure S4. Examples extracted mass traces of a spiked bovine muscle tissue at 2 MRL according to the established criteria for analyte identification..... | 177 |

**Table S1.** Concentration of the standard solution, maximum residue limit (MRL), minimum required performance level (MRPL) in bovine muscle.

| Group/Class - Pharmacologically active Substance | Solvent used                   | Stock standard concentration ( $\mu\text{g mL}^{-1}$ ) | MRL in bovine muscle ( $\mu\text{g Kg}^{-1}$ ) | Reference |
|--------------------------------------------------|--------------------------------|--------------------------------------------------------|------------------------------------------------|-----------|
| <b>Antimicrobials/Aminoglycosides</b>            |                                |                                                        |                                                |           |
| Amikacin                                         | Water                          | 512.6                                                  | 500 <sup>a</sup>                               |           |
| Apramycin                                        | Water                          | 486.8                                                  | 1000                                           | [101]     |
| Dihydrostreptomycin                              | Water                          | 499.2                                                  | 600                                            | [101]     |
| Spectinomycin                                    | Water                          | 511.3                                                  | 500                                            | [101]     |
| Streptomycin                                     | Water                          | 504.1                                                  | 500                                            | [101]     |
| Gentamicin                                       | Water                          | 510.8                                                  | 100                                            | [101]     |
| Hygromycin B                                     | Water                          | 489.8                                                  | 500 <sup>a</sup>                               |           |
| Kanamycin A                                      | Water                          | 505.4                                                  | 100                                            | [101]     |
| Neomycin B                                       | Water                          | 494.2                                                  | 500                                            | [101]     |
| Tobramycin                                       | Water                          | 200.0                                                  | 500 <sup>a</sup>                               |           |
| <b>Antimicrobials/Amphenicols</b>                |                                |                                                        |                                                |           |
| Chloramphenicol                                  | Methanol                       | 100.2                                                  | 0.30                                           | [94]      |
| Florfenicol                                      | Methanol                       | 100.0                                                  | 200                                            | [101]     |
| Thiamphenicol                                    | Methanol                       | 100.3                                                  | 50                                             | [96]      |
| <b>Antimicrobials/Betalactams</b>                |                                |                                                        |                                                |           |
| Amoxicillin                                      | Water                          | 195.3                                                  | 50                                             | [101]     |
| Ampicillin                                       | Water                          | 194.7                                                  | 50                                             | [101]     |
| Cephalexin                                       | Water                          | 297.8                                                  | 200                                            | [101]     |
| Cefalonium                                       | DMSO (sonicated)               | 194.8                                                  | 10                                             | [103]     |
| Cephapirin                                       | Acetonitrile/Water 75:25 (v/v) | 199.8                                                  | 50                                             | [101]     |
| Cefazolin                                        | Water                          | 200.7                                                  | 50                                             | [103]     |
| Cefoperazone                                     | Acetonitrile/Water 75:25 (v/v) | 79.7                                                   | 50 <sup>a</sup>                                |           |
| Cefquinome                                       | 12.5% DMSO/ methanol           | 167.1                                                  | 50                                             | [101]     |
| Cloxacillin                                      | Water                          | 320.9                                                  | 300                                            | [101]     |
| Dicloxacin                                       | Water                          | 338.3                                                  | 300                                            | [101]     |
| Nafcillin                                        | Water                          | 347.9                                                  | 300                                            | [101]     |
| Oxacillin                                        | Water                          | 516.4                                                  | 300                                            | [96]      |
| Benzylpenicillin                                 | Water                          | 196.9                                                  | 50                                             | [101]     |
| Phenoxyethyl penicillin                          | Water                          | 203.5                                                  | 25 <sup>b,c</sup>                              | [101]     |
| <b>Antimicrobials/Lincosamides</b>               |                                |                                                        |                                                |           |
| Clindamycin                                      | Methanol                       | 474.2                                                  | 50 <sup>a</sup>                                |           |
| Lincomycin                                       | Methanol                       | 491.0                                                  | 100                                            | [101]     |
| <b>Antimicrobials/Macrolides</b>                 |                                |                                                        |                                                |           |
| Azithromycin                                     | Water                          | 101.2                                                  | 50                                             | [94]      |

| Group/Class - Pharmacologically active Substance           | Solvent used                         | Stock standard concentration ( $\mu\text{g mL}^{-1}$ ) | MRL in bovine muscle ( $\mu\text{g Kg}^{-1}$ ) | Reference |
|------------------------------------------------------------|--------------------------------------|--------------------------------------------------------|------------------------------------------------|-----------|
| Erythromycin A                                             | Methanol                             | 472.8                                                  | 200                                            | [101]     |
| Spiramycin I                                               | Methanol                             | 497.7                                                  | 200                                            | [101]     |
| Tilmicosin                                                 | Methanol                             | 500.4                                                  | 100                                            | [101]     |
| Tylosin A                                                  | Methanol                             | 496.8                                                  | 100                                            | [101]     |
| <b>Antimicrobials/Quinolones-Fluoroquinolones</b>          |                                      |                                                        |                                                |           |
| Nalidixic acid                                             | NaOH 1 mol L <sup>-1</sup> /Methanol | 1001.8                                                 | 20                                             | [94]      |
| Oxolinic acid                                              | NaOH 1 mol L <sup>-1</sup> /Methanol | 125.0                                                  | 100                                            | [101]     |
| Ciprofloxacin                                              | NaOH 1 mol L <sup>-1</sup> /Methanol | 300.9                                                  | 100                                            | [101]     |
| Danofloxacin                                               | Acetone/Methanol                     | 995.0                                                  | 200                                            | [101]     |
| Difloxacin                                                 | Acetone/Methanol                     | 999.0                                                  | 400                                            | [101]     |
| Enrofloxacin                                               | Acetone/Methanol                     | 1004.9                                                 | 100                                            | [101]     |
| Flumequine                                                 | NaOH 1 mol L <sup>-1</sup> /Methanol | 204.0                                                  | 500                                            | [101]     |
| Norfloxacin                                                | Acetone/Methanol                     | 1005.0                                                 | 20                                             | [94]      |
| Sarafloxacin                                               | Acetone/Methanol                     | 220.1                                                  | 10 <sup>d</sup>                                | [101]     |
| <b>Antimicrobials/Sulphonamides</b>                        |                                      |                                                        |                                                |           |
| Sulfachlorpyridazine                                       | Methanol                             | 1000.0                                                 | 100                                            | [101]     |
| Sulfadiazine                                               | Methanol                             | 500.0                                                  | 100                                            | [101]     |
| Sulfadimethoxine                                           | Methanol                             | 250.0                                                  | 100                                            | [101]     |
| Sulfadoxine                                                | Methanol                             | 250.0                                                  | 100                                            | [101]     |
| Sulfisoxazole/Sulfafurazole                                | Methanol                             | 1000.0                                                 | 100                                            | [101]     |
| Sulfamerazine                                              | Methanol                             | 1000.0                                                 | 100                                            | [101]     |
| Sulfamethazine/Sulfadimidine                               | Methanol                             | 250.0                                                  | 100                                            | [101]     |
| Sulfathiazole                                              | Methanol                             | 1000.0                                                 | 100                                            | [101]     |
| Sulfamethoxazole                                           | Methanol                             | 1000.0                                                 | 100                                            | [101]     |
| Sulfaquinoxaline                                           | Acetone/Methanol                     | 1000.0                                                 | 100                                            | [101]     |
| <b>Antimicrobials/Tetracyclines</b>                        |                                      |                                                        |                                                |           |
| Chlortetracycline                                          | Methanol                             | 511.7                                                  | 200                                            | [101]     |
| Doxycycline                                                | Methanol                             | 463.0                                                  | 100                                            | [101]     |
| Oxytetracycline                                            | Methanol                             | 498.7                                                  | 200                                            | [101]     |
| Tetracycline                                               | Methanol                             | 515.8                                                  | 200                                            | [101]     |
| <b>Antimicrobials/Others</b>                               |                                      |                                                        |                                                |           |
| Bromhexine                                                 | Methanol                             | 490.3                                                  | 10                                             |           |
| Dapsone                                                    | Methanol                             | 393.6                                                  | 10                                             |           |
| Rifampicin                                                 | Methanol                             | 367.7                                                  | 10                                             |           |
| Tiamulin                                                   | Methanol                             | 171.3                                                  | 100 <sup>c,d</sup>                             | [101]     |
| <b>Antimicrobials Prospect/Quinolones-Fluoroquinolones</b> |                                      |                                                        |                                                |           |
| Marbofloxacin                                              | NaOH 1 mol L <sup>-1</sup> /Methanol | 100.0                                                  | 150                                            | [101]     |
| <b>Antimicrobials Prospect/Macrolides</b>                  |                                      |                                                        |                                                |           |

| Group/Class - Pharmacologically active Substance | Solvent used               | Stock standard concentration ( $\mu\text{g mL}^{-1}$ ) | MRL in bovine muscle ( $\mu\text{g Kg}^{-1}$ ) | Reference |
|--------------------------------------------------|----------------------------|--------------------------------------------------------|------------------------------------------------|-----------|
| Josamycin/Leucomycin A <sub>3</sub>              | Methanol                   | 202.3                                                  | 100 <sup>a</sup>                               |           |
| Leucomycin/Leucomycin A <sub>5</sub>             | Methanol                   | 100.3                                                  | 100 <sup>a</sup>                               |           |
| Tildipirosin                                     | Methanol                   | 446.3                                                  | 400                                            | [101]     |
| Tulathromycin A                                  | Methanol                   | 270.6                                                  | 300                                            | [101]     |
| <b>Antimicrobials Prospect/Sulfonamides</b>      |                            |                                                        |                                                |           |
| Phthalylsulfathiazole                            | Methanol                   | 251.0                                                  | 100                                            | [101]     |
| Sulfacetamide/ <i>N</i> -Sulfanilylacetamide     | Methanol                   | 250.2                                                  | 100                                            | [101]     |
| Sulfamethoxypyridazine                           | Methanol                   | 250.0                                                  | 100                                            | [101]     |
| <b>Antimicrobials Prospect/Others</b>            |                            |                                                        |                                                |           |
| Diminazene                                       | Methanol                   | 218.5                                                  | 500                                            | [101]     |
| Fosfomycin                                       | Water                      | 184.3                                                  | 500                                            | [103]     |
| Isoniazid                                        | 6% DMSO in methanol        | 640.6                                                  | 10                                             |           |
| Novobiocin                                       | Methanol                   | 287.1                                                  | 1000                                           | [102]     |
| Rifaximin                                        | Methanol/Water 50:50 (v/v) | 282.9                                                  | 10                                             |           |
| <b>Antibiotic Growth Promoters</b>               |                            |                                                        |                                                |           |
| Dichloroisoevernic acid                          | Methanol                   | 1000.0                                                 | 800                                            | [103]     |
| Halquinol/Chlorhydroxyquinoline                  | 12.5% DMSO in methanol     | 102.6                                                  | 40 <sup>c</sup>                                | [101]     |
| Virginiamycin M <sub>1</sub>                     | Methanol                   | 100.9                                                  | 100                                            | [103]     |
| <b>Anticoccidials</b>                            |                            |                                                        |                                                |           |
| Amprolium                                        | Methanol                   | 1000.0                                                 | 500                                            | [102]     |
| Clopidol                                         | Methanol                   | 1000.0                                                 | 200                                            | [103]     |
| Diaveridine                                      | Methanol                   | 1000.0                                                 | 50 <sup>b</sup>                                | [103]     |
| Decoquate                                        | Methanol                   | 1000.0                                                 | 1000                                           | [103]     |
| Diclazuril                                       | DMSO                       | 1000.0                                                 | 50                                             | [103]     |
| Ethopabate                                       | Methanol                   | 1000.0                                                 | 500 <sup>b</sup>                               | [102]     |
| Lasalocid A                                      | Acetonitrile               | 1000.0                                                 | 10                                             | [101]     |
| Maduramicin                                      | Methanol                   | 100.6                                                  | 30 <sup>b</sup>                                | [101]     |
| Monensin A                                       | Methanol                   | 101.9                                                  | 10                                             | [101]     |
| Narasin A                                        | Methanol                   | 1000.0                                                 | 15                                             | [101]     |
| 4,4'-Dinitrocarbanilide – DNC                    | DMSO                       | 1000.0                                                 | 4000 <sup>d</sup>                              | [101]     |
| Robenidine                                       | Methanol                   | 1000.0                                                 | 200 <sup>d</sup>                               | [101]     |
| Salinomycin                                      | DMSO                       | 1000.0                                                 | 20                                             | [103]     |
| Toltrazuril                                      | DMSO                       | 1000.0                                                 | 100                                            | [101]     |
| Trimethoprim                                     | Methanol                   | 1000.0                                                 | 50                                             | [101]     |
| <b>Anti-inflammatories/Steroidal</b>             |                            |                                                        |                                                |           |
| Prednisolone                                     | Methanol                   | 270.2                                                  | 4                                              | [101]     |
| Prednisone                                       | Methanol                   | 276.4                                                  | 4                                              |           |
| <b>Anti-inflammatories Prospect/Steroidal</b>    |                            |                                                        |                                                |           |

| Group/Class - Pharmacologically active Substance                   | Solvent used               | Stock standard concentration ( $\mu\text{g mL}^{-1}$ ) | MRL in bovine muscle ( $\mu\text{g Kg}^{-1}$ ) | Reference |
|--------------------------------------------------------------------|----------------------------|--------------------------------------------------------|------------------------------------------------|-----------|
| Isoflupredone acetate/9-Fluoroprednisolone acetate                 | Methanol                   | 169.3                                                  | 10                                             |           |
| Flumetasone                                                        | Methanol                   | 352.8                                                  | 10                                             |           |
| <b>Anti-Inflammatory/Non-Steroidal</b>                             |                            |                                                        |                                                |           |
| Mefenamic acid                                                     | Methanol                   | 203.3                                                  | 20                                             | [94]      |
| Tolfenamic acid                                                    | Acetonitrile               | 184.5                                                  | 50                                             | [101]     |
| Carprofen                                                          | 6% DMSO in methanol        | 201.6                                                  | 500                                            | [101]     |
| Ketoprofen                                                         | Acetonitrile               | 180.5                                                  | 50                                             | [103]     |
| Diclofenac                                                         | 6% DMSO in methanol        | 204.0                                                  | 5                                              | [101]     |
| Flunixin                                                           | Methanol                   | 99.2                                                   | 20                                             | [101]     |
| Indomethacin                                                       | Methanol                   | 177.5                                                  | 20                                             | [94]      |
| Meloxicam                                                          | 12.5% DMSO in methanol     | 192.0                                                  | 20                                             | [101]     |
| Naproxen                                                           | 6% DMSO in methanol        | 162.2                                                  | 20                                             | [94]      |
| Nimesulide                                                         | Methanol                   | 205.0                                                  | 20                                             | [94]      |
| Piroxycam                                                          | DMSO                       | 100.8                                                  | 20                                             | [94]      |
| Propyphenazone                                                     | Methanol                   | 193.4                                                  | 20                                             | [94]      |
| <b>Antiparasitic/Avermectins</b>                                   |                            |                                                        |                                                |           |
| Avermectin B <sub>1a</sub> /Abamectin B <sub>1a</sub>              | Methanol                   | 113.1                                                  | 20                                             | [103]     |
| Doramectin                                                         | Methanol                   | 109.4                                                  | 10                                             | [101]     |
| Emamectin B <sub>1a</sub>                                          | Methanol                   | 151.1                                                  | 2                                              | [103]     |
| Eprinomectin B <sub>1a</sub>                                       | Methanol                   | 89.8                                                   | 100                                            | [101]     |
| Ivermectin B <sub>1a</sub> /22,23-Dihydroavermectin B <sub>1</sub> | Methanol                   | 93.2                                                   | 30                                             | [101]     |
| Moxidectin                                                         | Methanol                   | 88.6                                                   | 20                                             | [101]     |
| <b>Antiparasitic/Benzimidazoles</b>                                |                            |                                                        |                                                |           |
| Albendazole                                                        | 12.5% DMSO in acetonitrile | 205.5                                                  | 100                                            | [101]     |
| Albendazole sulfone                                                | 12.5% DMSO in methanol     | 216.4                                                  | 100                                            | [101]     |
| Albendazole sulfoxide                                              | 12.5% DMSO in methanol     | 147.6                                                  | 100                                            | [101]     |
| Closantel                                                          | Acetonitrile               | 210.1                                                  | 1000                                           | [101]     |
| Febantel                                                           | Acetonitrile               | 254.4                                                  | 100                                            | [101]     |
| Fenbendazole                                                       | 12.5% DMSO in acetonitrile | 221.0                                                  | 100                                            | [101]     |
| Fenbendazole sulfone                                               | 12.5% DMSO in acetonitrile | 181.4                                                  | 100                                            | [101]     |
| Flubendazole                                                       | 12.5% DMSO in acetonitrile | 213.7                                                  | 20                                             | [103]     |
| 2-Aminoflubendazole                                                | 12.5% DMSO in acetonitrile | 134.7                                                  | 20                                             | [103]     |
| Levamisole                                                         | Acetonitrile/DMSO/Methanol | 217.0                                                  | 10                                             | [101]     |
| Mebendazole                                                        | Acetonitrile               | 204.3                                                  | 20                                             | [104]     |

| Group/Class - Pharmacologically active Substance          | Solvent used       | Stock standard concentration ( $\mu\text{g mL}^{-1}$ ) | MRL in bovine muscle ( $\mu\text{g Kg}^{-1}$ ) | Reference |
|-----------------------------------------------------------|--------------------|--------------------------------------------------------|------------------------------------------------|-----------|
| Oxibendazole                                              | Methanol           | 103.2                                                  | 100                                            | [101]     |
| Oxfendazole                                               | Acetonitrile/ DMSO | 211.1                                                  | 100                                            | [101]     |
| Thiabendazole                                             | Acetonitrile       | 164.8                                                  | 100                                            | [101]     |
| Triclabendazole                                           | Acetonitrile       | 404.5                                                  | 250                                            | [101]     |
| <b>Antiparasitic/Phenylpyrazoles</b>                      |                    |                                                        |                                                |           |
| Fipronil                                                  | Methanol           | 134.9                                                  | 500                                            | [103]     |
| Fipronil sulfone                                          | Methanol           | 87.2                                                   | 500                                            | [103]     |
| <b>Antiparasitic/Nitroimidazoles</b>                      |                    |                                                        |                                                |           |
| Dimetridazole                                             | Acetonitrile/ DMSO | 225.6                                                  | 10                                             |           |
| Hydroxydimetridazole/HMMNI                                | Acetonitrile       | 203.3                                                  | 10                                             |           |
| Iprnidazole                                               | Acetonitrile       | 203.3                                                  | 3                                              | [94]      |
| Hydroxy Iprnidazole                                       | Acetonitrile       | 94.1                                                   | 3                                              | [94]      |
| Metronidazole                                             | Acetonitrile/ DMSO | 246.5                                                  | 10                                             |           |
| Hydroxymetronidazole                                      | Acetonitrile/ DMSO | 220.7                                                  | 10                                             |           |
| Ronidazole/1-Methyl-2-carbamoyloxymethyl-5-nitroimidazole | Acetonitrile/ DMSO | 203.8                                                  | 10                                             |           |
| <b>Antiparasitic/Isoquinoline-pyrazines</b>               |                    |                                                        |                                                |           |
| Praziquantel                                              | Methanol           | 240.5                                                  | 300                                            | [103]     |
| <b>Beta-Agonists</b>                                      |                    |                                                        |                                                |           |
| Cimaterol                                                 | Methanol           | 100.2                                                  | 10                                             |           |
| Clenbuterol                                               | Methanol           | 1000.0                                                 | 0.2                                            | [101]     |
| Ractopamine                                               | Methanol           | 100.1                                                  | 10                                             | [101]     |
| Salbutamol                                                | Methanol           | 1000.0                                                 | 10                                             |           |
| Zilpaterol                                                | Methanol           | 100.8                                                  | 0.5                                            | [101]     |
| <b>Sedatives</b>                                          |                    |                                                        |                                                |           |
| Acepromazine                                              | Methanol           | 101.1                                                  | 10                                             |           |
| Azaperol                                                  | Methanol           | 101.4                                                  | 60 <sup>c</sup>                                | [101]     |
| Azaperone                                                 | Methanol           | 102.7                                                  | 60 <sup>c</sup>                                | [101]     |
| Carazolol                                                 | Methanol           | 101.2                                                  | 5                                              | [101]     |
| Chlorpromazine                                            | Methanol           | 211.5                                                  | 10                                             |           |
| <b>Prospecting sedatives</b>                              |                    |                                                        |                                                |           |
| Xylazine                                                  | Methanol           | 100.2                                                  | 20                                             | [103]     |
| <b>Corants</b>                                            |                    |                                                        |                                                |           |
| Gentian violet/Crystal violet                             | Acetonitrile       | 98.9                                                   | 10                                             |           |
| Leucocrystal Violet                                       | Acetonitrile       | 290.8                                                  | 10                                             |           |
| Malachite green                                           | Acetonitrile       | 140.7                                                  | 10                                             |           |
| Leucomalachite green                                      | Acetonitrile       | 113.9                                                  | 10                                             |           |

<sup>a</sup>Class - Pharmacologically active substance; <sup>b</sup>Chicken, muscle; <sup>c</sup>Pig, muscle; <sup>d</sup>Broiler chicken, muscle. Abbreviations:  $\mu\text{g/mL}$ : microgram per milliliter;  $\mu\text{g Kg}^{-1}$ : micrograms per kilogram; DMSO: dimethyl sulfoxide.

**Table S2.** Chromatographic conditions of the different methods evaluated for the Accela 1,250 Pump UHPLC system.

| Parameter                    | Condition                                                                                                                                                                               |                                                                                                                                                                                         |                                                                                                                                                                                         |
|------------------------------|-----------------------------------------------------------------------------------------------------------------------------------------------------------------------------------------|-----------------------------------------------------------------------------------------------------------------------------------------------------------------------------------------|-----------------------------------------------------------------------------------------------------------------------------------------------------------------------------------------|
|                              | Method A                                                                                                                                                                                | Method B                                                                                                                                                                                |                                                                                                                                                                                         |
|                              |                                                                                                                                                                                         | Aqueous extract                                                                                                                                                                         | Organic extract (ACN)                                                                                                                                                                   |
| Column and Pre-column        | Acquity UHPLC <sup>®</sup> BEH C18 (50 mm x 2.1 mm d.i x 1.7 $\mu$ m). Waters VanGuardAcquity UPLC <sup>®</sup> BEH C18 (5 mm x 2.1 mm d.i x 1.7 $\mu$ m). Waters                       |                                                                                                                                                                                         |                                                                                                                                                                                         |
| Column and inlet temperature | 30 $\pm$ 5°C and 15 °C                                                                                                                                                                  | 35 $\pm$ 5°C and 15°C                                                                                                                                                                   | 30 $\pm$ 5°C and 15°C                                                                                                                                                                   |
| Injection volume             | 5 $\mu$ L                                                                                                                                                                               | 10 $\mu$ L                                                                                                                                                                              |                                                                                                                                                                                         |
| Mobile phase                 | MPA: 0.01% formic acid in water<br>MPB: MeOH                                                                                                                                            | MPA: Amonium formate 5 mmol L <sup>-1</sup> + 0.1% formic acid in water<br>MPB: H <sub>2</sub> O/ACN 5:95 + 0.1% formic acid                                                            | MPA: Amonium formate 0.2 mol L <sup>-1</sup> + 0.1% formic acid<br>MPB: H <sub>2</sub> O/ACN 5:95 + 0.1% formic acid                                                                    |
| Gradient                     | 0.0 min: 95% MPA. 5% MPB $\rightarrow$ 7.0 min: 0% MPA. 100% MPB $\rightarrow$ 10.0 min: 0% MPA. 100% MPB $\rightarrow$ 10.1 min: 95% MPA. 5% MPB $\rightarrow$ 17 min: 95% MPA. 5% MPB | 0.0 min: 100% MPA. 0% MPB $\rightarrow$ 2.0 min: 80% MPA. 20% MPB $\rightarrow$ 3.5 min: 5% MPA. 95% MPB $\rightarrow$ 4.5 min: 5% MPA. 95% MPB $\rightarrow$ 5.0 min: 100% MPA. 0% MPB | 0.0 min: 100% MPA. 0% MPB $\rightarrow$ 1.5 min: 100% MPA. 0% MPB $\rightarrow$ 2.5 min: 2% MPA. 98% MPB $\rightarrow$ 3.5 min: 2% MPA. 98% MPB $\rightarrow$ 4.0 min: 100% MPA. 0% MPB |
| Flow                         | 0.1 mL min <sup>-1</sup>                                                                                                                                                                | 0.4 mL min <sup>-1</sup>                                                                                                                                                                |                                                                                                                                                                                         |
| Run time                     | 17.0 min                                                                                                                                                                                | 20.0 min                                                                                                                                                                                |                                                                                                                                                                                         |

Abbreviations:  $\mu$ L: microliter; min: minute; mL min<sup>-1</sup>: milliliter per minute; ACN: acetonitrile; H<sub>2</sub>O: water; MeOH: methanol; MPA: mobile phase A; MPB: mobile phase B.



**Table S3.** Mass spectrometer conditions of different methods evaluated for the Q-Exactive Orbitrap HRMS system.

| Parameter (HESI <sup>+</sup> ), (HESI <sup>-</sup> ) |                                                          |
|------------------------------------------------------|----------------------------------------------------------|
| <i>Ion source</i>                                    |                                                          |
| Spray voltage                                        | 3.9 kV (HESI <sup>+</sup> ); 2.9 kV (HESI <sup>-</sup> ) |
| Capillary temperature                                | 350°C                                                    |
| Sheath gas                                           | 40 arb                                                   |
| Auxiliary gas                                        | 15 arb                                                   |
| S-Lens RF                                            | 50 arb                                                   |
| <i>Full-MS</i>                                       |                                                          |
| Microscans                                           | 1                                                        |
| Resolution                                           | 35,000 FWHM                                              |
| Target automatic gain control (AGC targeted)         | 3.0×10 <sup>6</sup>                                      |
| Maximum injection time (IT)                          | 100 ms                                                   |
| Scan range                                           | 65-975 <i>m/z</i>                                        |
| <i>AIF</i>                                           |                                                          |
| Microscans                                           | 1                                                        |
| Resolution                                           | 17,500 FWHM                                              |
| AGC targeted                                         | 3.0×10 <sup>6</sup>                                      |
| Maximum injection time                               | 100 ms                                                   |
| Normalized collision energy (NCE)                    | 10, 35 and 80 eV                                         |
| Scan range                                           | 65-975 <i>m/z</i>                                        |

Abbreviations: Arb: arbitrary units; FWHM: full width at half maximum; ms: milli seconds; *m/z*: mass to charge.



| Group/Class - Pharmacologically active Substance                                                                                                                                                               | Physicochemical properties                                                                                                                                                                                                                                                                                    | Monitored ion      | Theoretical exact mass MS ( <i>m/z</i> ) | Fragment ions ( <i>m/z</i> ) MS <sup>2</sup>                 |                    |                                               |
|----------------------------------------------------------------------------------------------------------------------------------------------------------------------------------------------------------------|---------------------------------------------------------------------------------------------------------------------------------------------------------------------------------------------------------------------------------------------------------------------------------------------------------------|--------------------|------------------------------------------|--------------------------------------------------------------|--------------------|-----------------------------------------------|
|                                                                                                                                                                                                                |                                                                                                                                                                                                                                                                                                               |                    |                                          | [M+H] <sup>+</sup>                                           | [M-H] <sup>-</sup> | Others                                        |
| <p><i>Apramycin</i></p> <p>CAS registration number: 37321-09-8</p> <p>ChemSpider ID: 2339128</p> <p>PubChem CID: 3081545</p> 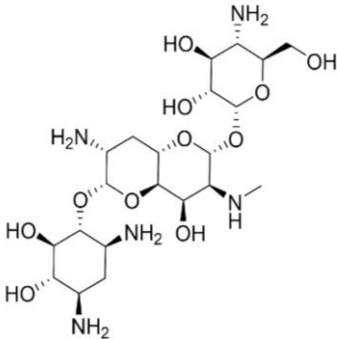 | <p>Molecular formula: C<sub>21</sub>H<sub>41</sub>N<sub>5</sub>O<sub>11</sub></p> <p>Monoisotopic mass (Da): 539.2797</p> <p>pKa (strongest acidic): 12.23</p> <p>pKa (strongest basic): 9.05</p> <p>Partition coefficient (Log P): -6.508</p> <p>Intrinsic solubility (mg mL<sup>-1</sup>): 1.526 (High)</p> | [M+H] <sup>+</sup> | 540.2875;<br>270.6474                    | 378.1841;<br>344.1816;<br>217.1183;<br>523.2610;<br>163.1077 |                    | [M+2H] <sup>2+</sup><br>217.1183;<br>163.1077 |

| Group/Class - Pharmacologically active Substance                                   | Physicochemical properties                                                           | Monitored ion                                                        | Theoretical exact mass MS ( <i>m/z</i> ) | Fragment ions ( <i>m/z</i> ) MS <sup>2</sup> |                                     |                                                |
|------------------------------------------------------------------------------------|--------------------------------------------------------------------------------------|----------------------------------------------------------------------|------------------------------------------|----------------------------------------------|-------------------------------------|------------------------------------------------|
|                                                                                    |                                                                                      |                                                                      |                                          | [M+H] <sup>+</sup>                           | [M-H] <sup>-</sup>                  | Others                                         |
| <i>Dihydrostreptomycin</i>                                                         | Molecular formula:<br>C <sub>21</sub> H <sub>41</sub> N <sub>7</sub> O <sub>12</sub> | [M+H] <sup>+</sup> ;<br>[M-H] <sup>-</sup> ;<br>[M+2H] <sup>2+</sup> | 584.2886;<br>582.2740;<br>292.6479       | 263.1462;<br>221.1244;<br>176.0917;          | 407.1898;<br>261.1319;<br>234.0986; | [M+2H] <sup>2+</sup><br>263.1462;<br>176.0917; |
| CAS registration number:<br>128-46-1                                               | Monoisotopic mass (Da): 583.2808                                                     |                                                                      |                                          | 186.0873;<br>409.2041                        | 243.1214;<br>219.1101               | 158.0812;<br>110.0600;<br>409.2041             |
| ChemSpider ID:<br>388489                                                           | pKa (strongest acidic):<br>11.91                                                     |                                                                      |                                          |                                              |                                     |                                                |
| PubChem CID:<br>439369                                                             | pKa (strongest basic):<br>10.91                                                      |                                                                      |                                          |                                              |                                     |                                                |
| 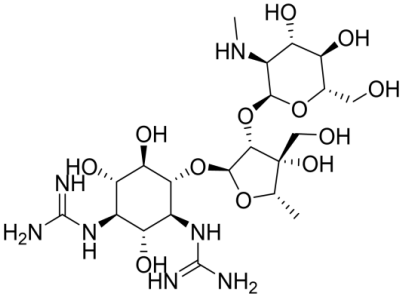 | Partition coefficient (Log P): -7.35                                                 |                                                                      |                                          |                                              |                                     |                                                |
|                                                                                    | Intrinsic solubility (mg mL <sup>-1</sup> ):<br>-0.185(High)                         |                                                                      |                                          |                                              |                                     |                                                |

| Group/Class - Pharmacologically active Substance                                 | Physicochemical properties                                                          | Monitored ion                                             | Theoretical exact mass MS ( <i>m/z</i> ) | Fragment ions ( <i>m/z</i> ) MS <sup>2</sup> |                    |                                                             |
|----------------------------------------------------------------------------------|-------------------------------------------------------------------------------------|-----------------------------------------------------------|------------------------------------------|----------------------------------------------|--------------------|-------------------------------------------------------------|
|                                                                                  |                                                                                     |                                                           |                                          | [M+H] <sup>+</sup>                           | [M-H] <sup>-</sup> | Others                                                      |
| <i>Spectinomycin</i>                                                             | Molecular formula:<br>C <sub>14</sub> H <sub>24</sub> N <sub>2</sub> O <sub>7</sub> | [M+H] <sup>+</sup> ;<br>[M+H <sub>3</sub> O] <sup>+</sup> | 333.1656;<br>352.1840                    | 98.0600;<br>94.0651;<br>207.1339             |                    | [M+H <sub>3</sub> O] <sup>+</sup><br>351.1762;<br>207.1339; |
| CAS registration number:<br>1695-77-8                                            | Monoisotopic mass (Da): 332.1578                                                    |                                                           |                                          | 140.0706;<br>110.0600                        |                    | 140.0706;<br>189.1234;<br>116.0706                          |
| ChemSpider ID: -                                                                 | pKa (strongest acidic):<br>8.98                                                     |                                                           |                                          |                                              |                    |                                                             |
| PubChem CID:<br>15541                                                            | pKa (strongest basic):<br>8.38                                                      |                                                           |                                          |                                              |                    |                                                             |
| 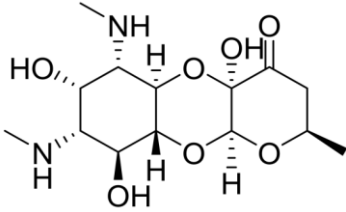 | Partition coefficient (Log P): -2.076                                               |                                                           |                                          |                                              |                    |                                                             |
|                                                                                  | Intrinsic solubility (mg mL <sup>-1</sup> ):<br>-0.846 (High)                       |                                                           |                                          |                                              |                    |                                                             |

| Group/Class - Pharmacologically active Substance                                 | Physicochemical properties                                                           | Monitored ion                         | Theoretical exact mass MS ( <i>m/z</i> ) | Fragment ions ( <i>m/z</i> ) MS <sup>2</sup> |                    |                                                    |
|----------------------------------------------------------------------------------|--------------------------------------------------------------------------------------|---------------------------------------|------------------------------------------|----------------------------------------------|--------------------|----------------------------------------------------|
|                                                                                  |                                                                                      |                                       |                                          | [M+H] <sup>+</sup>                           | [M-H] <sup>-</sup> | Others                                             |
| <i>Streptomycin</i>                                                              | Molecular formula:<br>C <sub>21</sub> H <sub>39</sub> N <sub>7</sub> O <sub>12</sub> | [M+H] <sup>+</sup> ;                  | 582.2730;                                | 263.1462;                                    | 261.1319;          | [M+2H] <sup>2+</sup>                               |
| CAS registration number:<br>57-92-1                                              |                                                                                      | [M-H] <sup>-</sup> ;                  | 580.2584;                                | 407.1885;                                    | 381.1742;          | 263.1462;                                          |
|                                                                                  |                                                                                      | [M+2H] <sup>2+</sup> ;                | 291.6401;                                | 540.2511;                                    | 318.1197;          | 176.0917;                                          |
| ChemSpider ID:<br>18508                                                          | Monoisotopic mass (Da): 581.2651                                                     | [M+H <sub>2</sub> O+H] <sup>+</sup> ; | 600.2835;                                | 176.0917;                                    | 219.1101;          | 158.0812;                                          |
|                                                                                  |                                                                                      | [M+H <sub>2</sub> O+2H] <sup>2+</sup> | 300.6454                                 | 246.1197                                     | 119.0352           | 110.0600                                           |
| PubChem CID:<br>19649                                                            | pKa (strongest acidic):<br>11.16                                                     |                                       |                                          |                                              |                    | [M+H <sub>2</sub> O+H] <sup>+</sup><br>101.0597;   |
|                                                                                  | pKa (strongest basic):<br>10.73                                                      |                                       |                                          |                                              |                    | 263.1462;                                          |
|                                                                                  |                                                                                      |                                       |                                          |                                              |                    | 176.0917                                           |
| 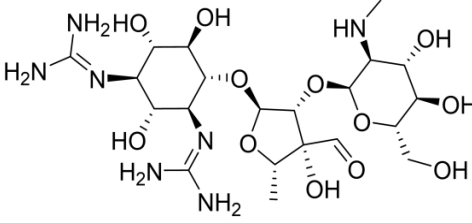 | Partition coefficient (Log P): -7.192                                                |                                       |                                          |                                              |                    | [M+H <sub>2</sub> O+2H] <sup>2+</sup><br>101.0597; |
|                                                                                  | Intrinsic solubility (mg mL <sup>-1</sup> ): -0.378 (High)                           |                                       |                                          |                                              |                    | 263.1462;                                          |
|                                                                                  |                                                                                      |                                       |                                          |                                              |                    | 176.0917                                           |

| Group/Class - Pharmacologically active Substance                                  | Physicochemical properties                                                          | Monitored ion                                | Theoretical exact mass MS ( <i>m/z</i> ) | Fragment ions ( <i>m/z</i> ) MS <sup>2</sup> |                    |                                               |
|-----------------------------------------------------------------------------------|-------------------------------------------------------------------------------------|----------------------------------------------|------------------------------------------|----------------------------------------------|--------------------|-----------------------------------------------|
|                                                                                   |                                                                                     |                                              |                                          | [M+H] <sup>+</sup>                           | [M-H] <sup>-</sup> | Others                                        |
| <i>Gentamicin (Gentamicin C<sub>1</sub>)</i>                                      | Molecular formula:<br>C <sub>21</sub> H <sub>43</sub> N <sub>5</sub> O <sub>7</sub> | [M+H] <sup>+</sup> ;<br>[M+2H] <sup>2+</sup> | 478.3235;<br>239.6654                    | 160.0968;<br>322.1973;<br>157.1335           |                    | [M+2H] <sup>2+</sup><br>160.0968;<br>322.1973 |
| CAS registration number:<br>25876-10-2                                            | Monoisotopic mass (Da): 477.3157                                                    |                                              |                                          |                                              |                    |                                               |
| ChemSpider ID:<br>65328                                                           | pKa (strongest acidic):<br>12.55                                                    |                                              |                                          |                                              |                    |                                               |
| PubChem CID:<br>72395                                                             | pKa (strongest basic):<br>10.03                                                     |                                              |                                          |                                              |                    |                                               |
| 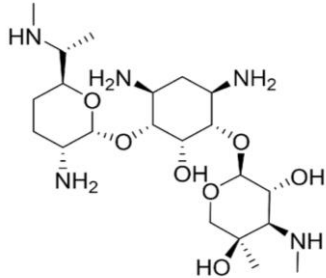 | Partition coefficient (Log P): -3.137                                               |                                              |                                          |                                              |                    |                                               |
|                                                                                   | Intrinsic solubility (mg mL <sup>-1</sup> ): -0.419 (High)                          |                                              |                                          |                                              |                    |                                               |

| Group/Class - Pharmacologically active Substance                                                                                                                                                                                        | Physicochemical properties                                                                                                                                                                                                                                                                                      | Monitored ion        | Theoretical exact mass MS ( <i>m/z</i> ) | Fragment ions ( <i>m/z</i> ) MS <sup>2</sup> |                    |                                         |
|-----------------------------------------------------------------------------------------------------------------------------------------------------------------------------------------------------------------------------------------|-----------------------------------------------------------------------------------------------------------------------------------------------------------------------------------------------------------------------------------------------------------------------------------------------------------------|----------------------|------------------------------------------|----------------------------------------------|--------------------|-----------------------------------------|
|                                                                                                                                                                                                                                         |                                                                                                                                                                                                                                                                                                                 |                      |                                          | [M+H] <sup>+</sup>                           | [M-H] <sup>-</sup> | Others                                  |
| <i>Gentamicin (Gentamicin C<sub>1a</sub>)</i><br><br>CAS registration number: 26098-04-4<br><br>ChemSpider ID: 65329<br><br>PubChem CID: 72396<br><br>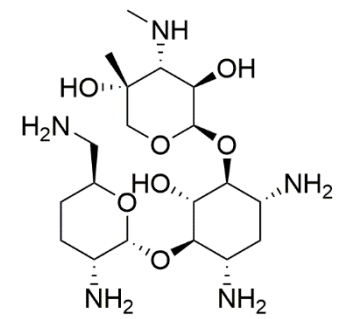 | Molecular formula: C <sub>19</sub> H <sub>39</sub> N <sub>5</sub> O <sub>7</sub><br><br>Monoisotopic mass (Da): 449.2844<br><br>pKa (strongest acidic): 12.55<br><br>pKa (strongest basic): 9.66<br><br>Partition coefficient (Log P): -3.986<br><br>Intrinsic solubility (mg mL <sup>-1</sup> ): -0.335 (High) | [M+2H] <sup>2+</sup> | 225.6498                                 |                                              |                    | [M+2H] <sup>2+</sup> 129.1022; 322.1973 |



| Group/Class - Pharmacologically active Substance                                                                                                                                                                                                      | Physicochemical properties                                                                                                                                                                                                                                                                                     | Monitored ion                                | Theoretical exact mass MS ( <i>m/z</i> ) | Fragment ions ( <i>m/z</i> ) MS <sup>2</sup> |                    |                                               |
|-------------------------------------------------------------------------------------------------------------------------------------------------------------------------------------------------------------------------------------------------------|----------------------------------------------------------------------------------------------------------------------------------------------------------------------------------------------------------------------------------------------------------------------------------------------------------------|----------------------------------------------|------------------------------------------|----------------------------------------------|--------------------|-----------------------------------------------|
|                                                                                                                                                                                                                                                       |                                                                                                                                                                                                                                                                                                                |                                              |                                          | [M+H] <sup>+</sup>                           | [M-H] <sup>-</sup> | Others                                        |
| <i>Gentamicin (Gentamicin C<sub>2</sub>-C<sub>2a</sub>)</i><br><br>CAS registration number: 25876-11-3<br><br>ChemSpider ID: 65330<br><br>PubChem CID: 72397<br><br>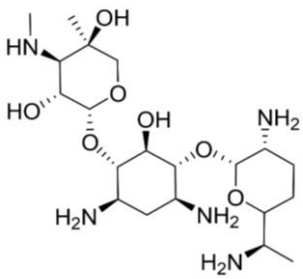 | Molecular formula: C <sub>20</sub> H <sub>41</sub> N <sub>5</sub> O <sub>7</sub><br><br>Monoisotopic mass (Da): 463.3001<br><br>pKa (strongest acidic): 12.55<br><br>pKa (strongest basic): 9.87<br><br>Partition coefficient (Log P): -3.57<br><br>Intrinsic solubility (mg mL <sup>-1</sup> ): -0.638 (High) | [M+H] <sup>+</sup> ;<br>[M+2H] <sup>2+</sup> | 464.3079;<br>232.6576                    | 160.0968;<br>163.1077;<br>322.1973           |                    | [M+2H] <sup>2+</sup><br>160.0968;<br>163.1077 |

| Group/Class - Pharmacologically active Substance                                  | Physicochemical properties                                                           | Monitored ion                                                        | Theoretical exact mass MS ( <i>m/z</i> ) | Fragment ions ( <i>m/z</i> ) MS <sup>2</sup> |                                     |                                                |
|-----------------------------------------------------------------------------------|--------------------------------------------------------------------------------------|----------------------------------------------------------------------|------------------------------------------|----------------------------------------------|-------------------------------------|------------------------------------------------|
|                                                                                   |                                                                                      |                                                                      |                                          | [M+H] <sup>+</sup>                           | [M-H] <sup>-</sup>                  | Others                                         |
| <i>Hygromycin (Hygromycin B)</i>                                                  | Molecular formula:<br>C <sub>20</sub> H <sub>37</sub> N <sub>3</sub> O <sub>13</sub> | [M+H] <sup>+</sup> ;<br>[M-H] <sup>-</sup> ;<br>[M+2H] <sup>2+</sup> | 528.2399;<br>526.2254;<br>264.6236       | 352.1238;<br>177.1234;<br>257.0656;          | 206.0659;<br>319.1500;<br>188.0553; | [M+2H] <sup>2+</sup><br>177.1234;<br>159.1128; |
| CAS registration number:<br>31282-04-9                                            | Monoisotopic mass (Da): 527.2321                                                     |                                                                      |                                          | 150.0761;<br>303.1551                        | 368.1187                            | 132.0655;<br>190.0710                          |
| ChemSpider ID:<br>28634700                                                        | pKa (strongest acidic):<br>11.4                                                      |                                                                      |                                          |                                              |                                     |                                                |
| PubChem CID:<br>56928061                                                          | pKa (strongest basic):<br>9.4                                                        |                                                                      |                                          |                                              |                                     |                                                |
| 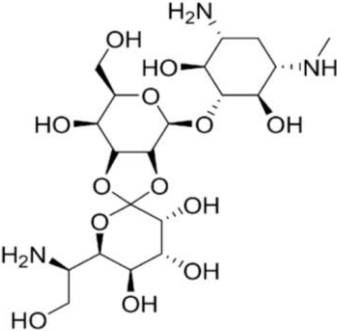 | Partition coefficient (Log P): -6.372                                                |                                                                      |                                          |                                              |                                     |                                                |
|                                                                                   | Intrinsic solubility (mg mL <sup>-1</sup> ): -0.323 (High)                           |                                                                      |                                          |                                              |                                     |                                                |
|                                                                                   |                                                                                      |                                                                      |                                          |                                              |                                     |                                                |

| Group/Class - Pharmacologically active Substance                                  | Physicochemical properties                                                           | Monitored ion                                                       | Theoretical exact mass MS ( <i>m/z</i> ) | Fragment ions ( <i>m/z</i> ) MS <sup>2</sup> |                       |                                    |
|-----------------------------------------------------------------------------------|--------------------------------------------------------------------------------------|---------------------------------------------------------------------|------------------------------------------|----------------------------------------------|-----------------------|------------------------------------|
|                                                                                   |                                                                                      |                                                                     |                                          | [M+H] <sup>+</sup>                           | [M-H] <sup>-</sup>    | Others                             |
| <i>Kanamycin (Kanamycin A)</i>                                                    | Molecular formula:<br>C <sub>18</sub> H <sub>36</sub> N <sub>4</sub> O <sub>11</sub> | [M+H] <sup>+</sup> ;<br>[M-H] <sup>-</sup> ;<br>[M+Na] <sup>+</sup> | 485.2453;<br>483.2308;<br>507.2273       | 163.1077;<br>84.0444;<br>68.0495;            | 322.1622;<br>354.0694 | [M+Na] <sup>+</sup><br>346.1582;   |
| CAS registration number:<br>59-01-8                                               | Monoisotopic mass (Da): 484.2375                                                     |                                                                     |                                          | 102.0550;<br>324.1756                        |                       | 163.1077;<br>249.0921;<br>263.2345 |
| ChemSpider ID:<br>388665                                                          | pKa (strongest acidic):<br>12.05                                                     |                                                                     |                                          |                                              |                       |                                    |
| PubChem CID:<br>6032                                                              | pKa (strongest basic):<br>9.34                                                       |                                                                     |                                          |                                              |                       |                                    |
| 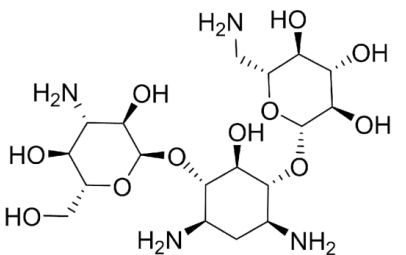 | Partition coefficient (Log P): -7.061                                                |                                                                     |                                          |                                              |                       |                                    |
|                                                                                   | Intrinsic solubility (mg mL <sup>-1</sup> ): 0.24 (High)                             |                                                                     |                                          |                                              |                       |                                    |

| Group/Class - Pharmacologically active Substance                                  | Physicochemical properties                                                           | Monitored ion                                | Theoretical exact mass MS ( <i>m/z</i> ) | Fragment ions ( <i>m/z</i> ) MS <sup>2</sup>    |                    |                                                                                      |
|-----------------------------------------------------------------------------------|--------------------------------------------------------------------------------------|----------------------------------------------|------------------------------------------|-------------------------------------------------|--------------------|--------------------------------------------------------------------------------------|
|                                                                                   |                                                                                      |                                              |                                          | [M+H] <sup>+</sup>                              | [M-H] <sup>-</sup> | Others                                                                               |
| <i>Neomycin (Neomycin B)</i>                                                      | Molecular formula:<br>C <sub>23</sub> H <sub>46</sub> N <sub>6</sub> O <sub>13</sub> | [M+H] <sup>+</sup> ;<br>[M+2H] <sup>2+</sup> | 615.3196;<br>308.1634                    | 455.2348;<br>323.1925;<br>161.0921;<br>203.1026 |                    | [M+2H] <sup>2+</sup><br>161.0921;<br>114.0550;<br>163.1077;<br>125.0709;<br>455.2348 |
| CAS registration number:<br>119-04-0                                              | Monoisotopic mass (Da): 614.3117                                                     |                                              |                                          |                                                 |                    |                                                                                      |
| ChemSpider ID:<br>8075                                                            | pKa (strongest acidic):<br>12.15                                                     |                                              |                                          |                                                 |                    |                                                                                      |
| PubChem CID:<br>8378                                                              | pKa (strongest basic):<br>9.3                                                        |                                              |                                          |                                                 |                    |                                                                                      |
| 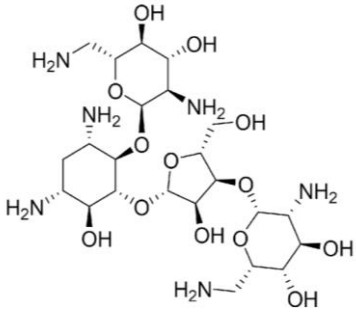 | Partition coefficient (Log P): Index -1 out of bounds for length 42                  |                                              |                                          |                                                 |                    |                                                                                      |
|                                                                                   | Intrinsic solubility (mg mL <sup>-1</sup> ): 0.525 (High)                            |                                              |                                          |                                                 |                    |                                                                                      |

| Group/Class - Pharmacologically active Substance                                                                            | Physicochemical properties                                                                                                                                                                                                                                                                                                           | Monitored ion                              | Theoretical exact mass<br>MS ( <i>m/z</i> ) | Fragment ions ( <i>m/z</i> ) MS <sup>2</sup>    |                                                              |        |
|-----------------------------------------------------------------------------------------------------------------------------|--------------------------------------------------------------------------------------------------------------------------------------------------------------------------------------------------------------------------------------------------------------------------------------------------------------------------------------|--------------------------------------------|---------------------------------------------|-------------------------------------------------|--------------------------------------------------------------|--------|
|                                                                                                                             |                                                                                                                                                                                                                                                                                                                                      |                                            |                                             | [M+H] <sup>+</sup>                              | [M-H] <sup>-</sup>                                           | Others |
| <i>Tobramycin</i><br><br>CAS registration number:<br>32986-56-4<br><br>ChemSpider ID:<br>33377<br><br>PubChem CID:<br>36294 | Molecular formula:<br>C <sub>18</sub> H <sub>37</sub> N <sub>5</sub> O <sub>9</sub><br><br>Monoisotopic mass<br>(Da): 467.2586<br><br>pKa (strongest acidic):<br>12.53<br><br>pKa (strongest basic):<br>9.42<br><br>Partition coefficient<br>(Log P): -6.478<br><br>Intrinsic solubility<br>(mg mL <sup>-1</sup> ): -0.023<br>(High) | [M+H] <sup>+</sup> ;<br>[M-H] <sup>-</sup> | 468.2664;<br>466.2519                       | 324.1765;<br>163.1077;<br>145.0972;<br>205.1182 | 305.1833;<br>234.0986;<br>304.1517;<br>178.0723;<br>287.1238 |        |

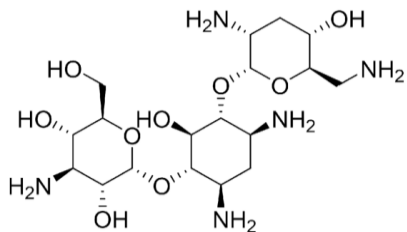

| Group/Class - Pharmacologically active Substance                                  | Physicochemical properties                                                                          | Monitored ion                              | Theoretical exact mass MS ( <i>m/z</i> ) | Fragment ions ( <i>m/z</i> ) MS <sup>2</sup> |                                     |        |
|-----------------------------------------------------------------------------------|-----------------------------------------------------------------------------------------------------|--------------------------------------------|------------------------------------------|----------------------------------------------|-------------------------------------|--------|
|                                                                                   |                                                                                                     |                                            |                                          | [M+H] <sup>+</sup>                           | [M-H] <sup>-</sup>                  | Others |
| <b>Antimicrobials/Amphenicols</b>                                                 |                                                                                                     |                                            |                                          |                                              |                                     |        |
| <i>Chloramphenicol</i>                                                            | Molecular formula:<br>C <sub>11</sub> H <sub>12</sub> Cl <sub>2</sub> N <sub>2</sub> O <sub>5</sub> | [M+H] <sup>+</sup> ;<br>[M-H] <sup>-</sup> | 323.0196;<br>321.0051                    | 274.9985;<br>165.0659;<br>82.9450;           | 152.0353;<br>321.0051;<br>121.0293; |        |
| CAS registration number:<br>56-75-7                                               | Monoisotopic mass<br>(Da): 322.0118                                                                 |                                            |                                          | 151.0628;<br>305.0090                        | 151.0274;<br>257.0335               |        |
| ChemSpider ID:<br>5744                                                            | pKa (strongest acidic):<br>10.79                                                                    |                                            |                                          |                                              |                                     |        |
| PubChem CID:<br>5959                                                              | pKa (strongest basic): -                                                                            |                                            |                                          |                                              |                                     |        |
| 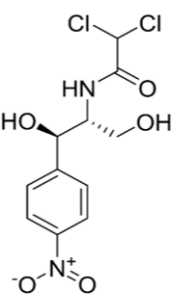 | Partition coefficient<br>(Log P): 0.879                                                             |                                            |                                          |                                              |                                     |        |
|                                                                                   | Intrinsic solubility<br>(mg mL <sup>-1</sup> ): -2.903<br>(High)                                    |                                            |                                          |                                              |                                     |        |

| Group/Class - Pharmacologically active Substance                                  | Physicochemical properties                                                               | Monitored ion                              | Theoretical exact mass MS ( <i>m/z</i> ) | Fragment ions ( <i>m/z</i> ) MS <sup>2</sup> |                                     |        |
|-----------------------------------------------------------------------------------|------------------------------------------------------------------------------------------|--------------------------------------------|------------------------------------------|----------------------------------------------|-------------------------------------|--------|
|                                                                                   |                                                                                          |                                            |                                          | [M+H] <sup>+</sup>                           | [M-H] <sup>-</sup>                  | Others |
| <i>Florfenicol</i>                                                                | Molecular formula:<br>C <sub>12</sub> H <sub>14</sub> Cl <sub>2</sub> FNO <sub>4</sub> S | [M+H] <sup>+</sup> ;<br>[M-H] <sup>-</sup> | 358.0077;<br>355.9932                    | 103.0542;<br>319.9907;<br>241.0053;          | 185.0278;<br>335.9870;<br>119.0499; |        |
| CAS registration number:<br>73231-34-2                                            | Monoisotopic mass<br>(Da): 356.9999                                                      |                                            |                                          | 210.0582;<br>206.0366                        | 78.9854;<br>121.0286                |        |
| ChemSpider ID:<br>102776                                                          | pKa (strongest acidic):<br>10.68                                                         |                                            |                                          |                                              |                                     |        |
| PubChem CID:<br>114811                                                            | pKa (strongest basic): -                                                                 |                                            |                                          |                                              |                                     |        |
| 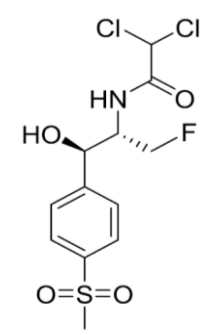 | Partition coefficient<br>(Log P): 0.67                                                   |                                            |                                          |                                              |                                     |        |
|                                                                                   | Intrinsic solubility<br>(mg mL <sup>-1</sup> ): -2.955<br>(High)                         |                                            |                                          |                                              |                                     |        |

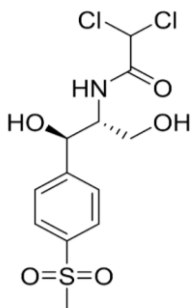



| Group/Class - Pharmacologically active Substance                                 | Physicochemical properties                                                            | Monitored ion                              | Theoretical exact mass MS ( <i>m/z</i> ) | Fragment ions ( <i>m/z</i> ) MS <sup>2</sup> |                                    |        |
|----------------------------------------------------------------------------------|---------------------------------------------------------------------------------------|--------------------------------------------|------------------------------------------|----------------------------------------------|------------------------------------|--------|
|                                                                                  |                                                                                       |                                            |                                          | [M+H] <sup>+</sup>                           | [M-H] <sup>-</sup>                 | Others |
| Antimicrobials/Betalactams                                                       |                                                                                       |                                            |                                          |                                              |                                    |        |
| Amoxicillin                                                                      | Molecular formula:<br>C <sub>16</sub> H <sub>19</sub> N <sub>3</sub> O <sub>5</sub> S | [M+H] <sup>+</sup> ;<br>[M-H] <sup>-</sup> | 366.1118;<br>364.0973                    | 349.0853;<br>211.0711;<br>86.0059;           | 223.0547;<br>206.0281;<br>83.0251; |        |
| CAS registration number:<br>26787-78-0                                           | Monoisotopic mass (Da): 365.1040                                                      |                                            |                                          | 107.0491;<br>114.0007                        | 133.0295;<br>123.0451              |        |
| ChemSpider ID:<br>31006                                                          | pKa (strongest acidic):<br>3.23                                                       |                                            |                                          |                                              |                                    |        |
| PubChem CID:<br>33613                                                            | pKa (strongest basic):<br>7.22                                                        |                                            |                                          |                                              |                                    |        |
| 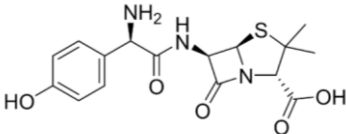 | Partition coefficient (Log P): -2.308                                                 |                                            |                                          |                                              |                                    |        |
|                                                                                  | Intrinsic solubility (mg mL <sup>-1</sup> ): -4.35 (Moderate)                         |                                            |                                          |                                              |                                    |        |

| Group/Class - Pharmacologically active Substance                                                                                                                                                      | Physicochemical properties                                                                                                                                                                                                                                                                                      | Monitored ion                              | Theoretical exact mass MS ( <i>m/z</i> ) | Fragment ions ( <i>m/z</i> ) MS <sup>2</sup>              |                                                            |        |
|-------------------------------------------------------------------------------------------------------------------------------------------------------------------------------------------------------|-----------------------------------------------------------------------------------------------------------------------------------------------------------------------------------------------------------------------------------------------------------------------------------------------------------------|--------------------------------------------|------------------------------------------|-----------------------------------------------------------|------------------------------------------------------------|--------|
|                                                                                                                                                                                                       |                                                                                                                                                                                                                                                                                                                 |                                            |                                          | [M+H] <sup>+</sup>                                        | [M-H] <sup>-</sup>                                         | Others |
| <i>Ampicillin</i><br><br>CAS registration number: 69-53-4<br><br>ChemSpider ID: 6013<br><br>PubChem CID: 6249<br><br>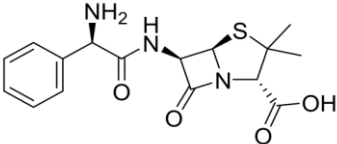 | Molecular formula: C <sub>16</sub> H <sub>19</sub> N <sub>3</sub> O <sub>4</sub> S<br><br>Monoisotopic mass (Da): 349.1091<br><br>pKa (strongest acidic): 3.24<br><br>pKa (strongest basic): 7.23<br><br>Partition coefficient (Log P): -2.005<br><br>Intrinsic solubility (mg mL <sup>-1</sup> ): -4.789 (Low) | [M+H] <sup>+</sup> ;<br>[M-H] <sup>-</sup> | 350.1169;<br>348.1024                    | 106.0651;<br>160.0427;<br>89.0389;<br>79.0542;<br>95.0491 | 207.0598;<br>348.1023;<br>74.0070;<br>99.9863;<br>304.1125 |        |

| Group/Class - Pharmacologically active Substance                                                                                                                                                           | Physicochemical properties                                                         | Monitored ion                             | Theoretical exact mass MS ( <i>m/z</i> ) | Fragment ions ( <i>m/z</i> ) MS <sup>2</sup> |                    |                                         |
|------------------------------------------------------------------------------------------------------------------------------------------------------------------------------------------------------------|------------------------------------------------------------------------------------|-------------------------------------------|------------------------------------------|----------------------------------------------|--------------------|-----------------------------------------|
|                                                                                                                                                                                                            |                                                                                    |                                           |                                          | [M+H] <sup>+</sup>                           | [M-H] <sup>-</sup> | Others                                  |
| <i>Cephalexin</i><br><br>CAS registration number: 15686-71-2<br><br>ChemSpider ID: 25541<br><br>PubChem CID: 27447<br><br>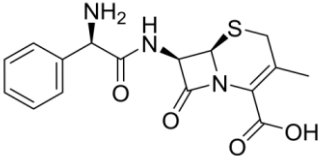 | Molecular formula: C <sub>16</sub> H <sub>17</sub> N <sub>3</sub> O <sub>4</sub> S | [M+H] <sup>+</sup> ;                      | 348.1013;                                | 68.0495;                                     | 233.0390;          | [(M+H <sub>2</sub> -CO)+H] <sup>+</sup> |
|                                                                                                                                                                                                            |                                                                                    | [M-H] <sup>-</sup> ;                      | 346.0867;                                | 160.0426;                                    | 70.9835;           | 191.0815;                               |
|                                                                                                                                                                                                            |                                                                                    | [(M+H <sub>2</sub> -CO)+H] <sup>+</sup> ; | 322.1220;                                | 158.0270;                                    | 268.1092;          | 184.9777;                               |
|                                                                                                                                                                                                            | Monoisotopic mass (Da): 347.0934                                                   | [M+H+CH <sub>3</sub> OH] <sup>+</sup>     | 380.1275                                 | 106.0651                                     | 173.0720;          | 106.0651;                               |
|                                                                                                                                                                                                            |                                                                                    |                                           |                                          |                                              | 107.0615           | 220.0791;                               |
|                                                                                                                                                                                                            |                                                                                    |                                           |                                          |                                              |                    | 209.0743                                |
|                                                                                                                                                                                                            | pKa (strongest acidic): 3.45                                                       |                                           |                                          |                                              |                    | [M+H+CH <sub>3</sub> OH] <sup>+</sup>   |
|                                                                                                                                                                                                            |                                                                                    |                                           |                                          |                                              |                    | 106.0651;                               |
|                                                                                                                                                                                                            | pKa (strongest basic): 7.23                                                        |                                           |                                          |                                              |                    | 174.0550;                               |
|                                                                                                                                                                                                            |                                                                                    |                                           |                                          |                                              |                    | 151.0866;                               |
|                                                                                                                                                                                                            |                                                                                    |                                           |                                          |                                              |                    | 198.0219                                |
|                                                                                                                                                                                                            | Partition coefficient (Log P): -2.141                                              |                                           |                                          |                                              |                    |                                         |
|                                                                                                                                                                                                            | Intrinsic solubility (mg mL <sup>-1</sup> ): -3.959 (Moderate)                     |                                           |                                          |                                              |                    |                                         |

| Group/Class - Pharmacologically active Substance                                 | Physicochemical properties                                                                                                                            | Monitored ion                                                  | Theoretical exact mass MS ( <i>m/z</i> ) | Fragment ions ( <i>m/z</i> ) MS <sup>2</sup>               |                    |                                                                                                         |
|----------------------------------------------------------------------------------|-------------------------------------------------------------------------------------------------------------------------------------------------------|----------------------------------------------------------------|------------------------------------------|------------------------------------------------------------|--------------------|---------------------------------------------------------------------------------------------------------|
|                                                                                  |                                                                                                                                                       |                                                                |                                          | [M+H] <sup>+</sup>                                         | [M-H] <sup>-</sup> | Others                                                                                                  |
| <i>Cefalonium</i>                                                                | Molecular formula:<br>C <sub>20</sub> H <sub>18</sub> N <sub>4</sub> O <sub>5</sub> S <sub>2</sub>                                                    | [M+H] <sup>+</sup> ;<br>[(M+H <sub>2</sub> CO)+H] <sup>+</sup> | 459.0791;<br>433.0999                    | 337.0311;<br>152.0165;<br>97.0106;<br>80.0495;<br>108.0682 |                    | [(M+H <sub>2</sub> -CO)+H] <sup>+</sup><br>119.0855;<br>337.0311;<br>311.0512;<br>228.0325;<br>209.0379 |
| CAS registration number:<br>5575-21-3                                            | Monoisotopic mass (Da): 458.0713                                                                                                                      |                                                                |                                          |                                                            |                    |                                                                                                         |
| ChemSpider ID:<br>20438                                                          | pKa (strongest acidic):<br>3.09                                                                                                                       |                                                                |                                          |                                                            |                    |                                                                                                         |
| PubChem CID:<br>21743                                                            | pKa (strongest basic):<br>-0.86                                                                                                                       |                                                                |                                          |                                                            |                    |                                                                                                         |
| 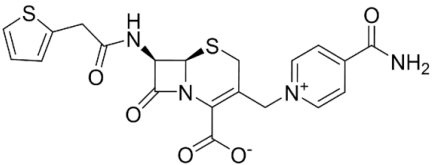 | Partition coefficient (Log P): -4.243                                                                                                                 |                                                                |                                          |                                                            |                    |                                                                                                         |
|                                                                                  | Intrinsic solubility (mg mL <sup>-1</sup> ): The molecule cannot be neutralized and the calculation is not defined for molecules with non-zero charge |                                                                |                                          |                                                            |                    |                                                                                                         |

| Group/Class - Pharmacologically active Substance                                                                                                                                                       | Physicochemical properties                                                                                                                                                                                                                                                                                                 | Monitored ion      | Theoretical exact mass MS ( <i>m/z</i> ) | Fragment ions ( <i>m/z</i> ) MS <sup>2</sup>                 |                    |        |
|--------------------------------------------------------------------------------------------------------------------------------------------------------------------------------------------------------|----------------------------------------------------------------------------------------------------------------------------------------------------------------------------------------------------------------------------------------------------------------------------------------------------------------------------|--------------------|------------------------------------------|--------------------------------------------------------------|--------------------|--------|
|                                                                                                                                                                                                        |                                                                                                                                                                                                                                                                                                                            |                    |                                          | [M+H] <sup>+</sup>                                           | [M-H] <sup>-</sup> | Others |
| <i>Cephapirin</i><br><br>CAS registration number: 21593-23-7<br><br>ChemSpider ID: -<br><br>PubChem CID: 30699<br><br>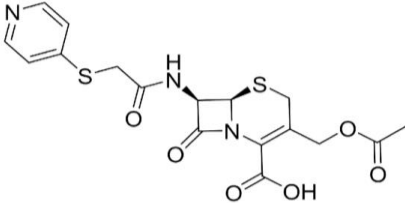 | Molecular formula: C <sub>17</sub> H <sub>17</sub> N <sub>3</sub> O <sub>6</sub> S <sub>2</sub><br><br>Monoisotopic mass (Da): 423.0553<br><br>pKa (strongest acidic): 3.54<br><br>pKa (strongest basic): 5<br><br>Partition coefficient (Log P): -2.001<br><br>Intrinsic solubility (mg mL <sup>-1</sup> ): -3.723 (High) | [M+H] <sup>+</sup> | 424.0632                                 | 292.0573;<br>181.0431;<br>152.0166;<br>141.0482;<br>112.0216 |                    |        |

| Group/Class - Pharmacologically active Substance                                 | Physicochemical properties                                                                         | Monitored ion                              | Theoretical exact mass MS ( <i>m/z</i> ) | Fragment ions ( <i>m/z</i> ) MS <sup>2</sup> |                                    |        |
|----------------------------------------------------------------------------------|----------------------------------------------------------------------------------------------------|--------------------------------------------|------------------------------------------|----------------------------------------------|------------------------------------|--------|
|                                                                                  |                                                                                                    |                                            |                                          | [M+H] <sup>+</sup>                           | [M-H] <sup>-</sup>                 | Others |
| <i>Cefazolin</i>                                                                 | Molecular formula:<br>C <sub>14</sub> H <sub>14</sub> N <sub>8</sub> O <sub>4</sub> S <sub>3</sub> | [M+H] <sup>+</sup> ;<br>[M-H] <sup>-</sup> | 455.0373;<br>453.0227                    | 156.0112;<br>80.0495;                        | 167.0285;<br>69.0207;              |        |
| CAS registration number:<br>25953-19-9                                           | Monoisotopic mass (Da): 454.0295                                                                   |                                            |                                          | 323.0557;<br>112.0215;<br>97.0106            | 251.0131;<br>130.9743;<br>207.0233 |        |
| ChemSpider ID:<br>30723                                                          | pKa (strongest acidic):<br>3.03                                                                    |                                            |                                          |                                              |                                    |        |
| PubChem CID:<br>33255                                                            | pKa (strongest basic):<br>0.26                                                                     |                                            |                                          |                                              |                                    |        |
| 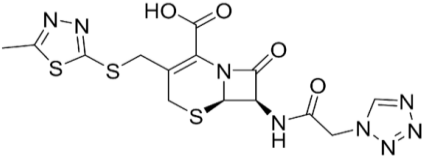 | Partition coefficient (Log P): -1.519                                                              |                                            |                                          |                                              |                                    |        |
|                                                                                  | Intrinsic solubility (mg mL <sup>-1</sup> ): -4.131 (Moderate)                                     |                                            |                                          |                                              |                                    |        |

| Group/Class - Pharmacologically active Substance                                 | Physicochemical properties                                                                         | Monitored ion                              | Theoretical exact mass MS ( <i>m/z</i> ) | Fragment ions ( <i>m/z</i> ) MS <sup>2</sup> |                                    |        |
|----------------------------------------------------------------------------------|----------------------------------------------------------------------------------------------------|--------------------------------------------|------------------------------------------|----------------------------------------------|------------------------------------|--------|
|                                                                                  |                                                                                                    |                                            |                                          | [M+H] <sup>+</sup>                           | [M-H] <sup>-</sup>                 | Others |
| <i>Cefoperazone</i>                                                              | Molecular formula:<br>C <sub>25</sub> H <sub>27</sub> N <sub>9</sub> O <sub>8</sub> S <sub>2</sub> | [M+H] <sup>+</sup> ;<br>[M-H] <sup>-</sup> | 646.1497;<br>644.1351                    | 530.1340;<br>115.0502;<br>186.0874;          | 115.0083;<br>117.0345;<br>71.9788; |        |
| CAS registration number:<br>62893-19-0                                           | Monoisotopic mass (Da): 645.1419                                                                   |                                            |                                          | 156.0114;<br>143.0815                        | 144.0454;<br>89.0397               |        |
| ChemSpider ID:<br>40206                                                          | pKa (strongest acidic):<br>3.38                                                                    |                                            |                                          |                                              |                                    |        |
| PubChem CID:<br>44187                                                            | pKa (strongest basic):<br>-1.98                                                                    |                                            |                                          |                                              |                                    |        |
| 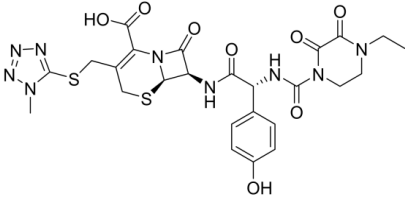 | Partition coefficient (Log P): -0.9                                                                |                                            |                                          |                                              |                                    |        |
|                                                                                  | Intrinsic solubility (mg mL <sup>-1</sup> ): -5.213 (Low)                                          |                                            |                                          |                                              |                                    |        |

| Group/Class - Pharmacologically active Substance                                                                                                                                                                | Physicochemical properties                                                                                                                                                                                                                                                                                                                                                                                               | Monitored ion                                                                            | Theoretical exact mass MS ( <i>m/z</i> ) | Fragment ions ( <i>m/z</i> ) MS <sup>2</sup>                 |                    |                                                                                                                                                                                        |
|-----------------------------------------------------------------------------------------------------------------------------------------------------------------------------------------------------------------|--------------------------------------------------------------------------------------------------------------------------------------------------------------------------------------------------------------------------------------------------------------------------------------------------------------------------------------------------------------------------------------------------------------------------|------------------------------------------------------------------------------------------|------------------------------------------|--------------------------------------------------------------|--------------------|----------------------------------------------------------------------------------------------------------------------------------------------------------------------------------------|
|                                                                                                                                                                                                                 |                                                                                                                                                                                                                                                                                                                                                                                                                          |                                                                                          |                                          | [M+H] <sup>+</sup>                                           | [M-H] <sup>-</sup> | Others                                                                                                                                                                                 |
| <i>Cefquinome</i><br><br>CAS registration number: 84957-30-2<br><br>ChemSpider ID: 16736863<br><br>PubChem CID: 5464355<br><br>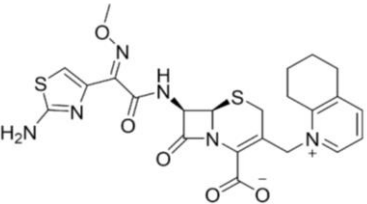 | Molecular formula: C <sub>23</sub> H <sub>24</sub> N <sub>6</sub> O <sub>5</sub> S <sub>2</sub><br><br>Monoisotopic mass (Da): 528.1244<br><br>pKa (strongest acidic): 2.85<br><br>pKa (strongest basic): 3.61<br><br>Partition coefficient (Log P): -3.531<br><br>Intrinsic solubility (mg mL <sup>-1</sup> ): The molecule cannot be neutralized and the calculation is not defined for molecules with non-zero charge | [M+H] <sup>+</sup> ;<br>[M+2H] <sup>2+</sup> ;<br>[(M+H <sub>2</sub> CO)+H] <sup>+</sup> | 529.1322;<br>265.0698;<br>503.1530       | 125.0056;<br>324.0579;<br>167.0272;<br>156.0224;<br>134.0964 |                    | [M+2H] <sup>2+</sup><br>134.0964;<br>199.1230;<br>167.0274;<br>125.0056<br><br>[(M+H <sub>2</sub> -CO)+H] <sup>+</sup><br>201.0441;<br>134.0964;<br>241.0390;<br>370.0631;<br>126.0120 |



| Group/Class - Pharmacologically active Substance                                                                                                                                                                            | Physicochemical properties                                                              | Monitored ion                             | Theoretical exact mass MS ( <i>m/z</i> ) | Fragment ions ( <i>m/z</i> ) MS <sup>2</sup> |                    |                                         |
|-----------------------------------------------------------------------------------------------------------------------------------------------------------------------------------------------------------------------------|-----------------------------------------------------------------------------------------|-------------------------------------------|------------------------------------------|----------------------------------------------|--------------------|-----------------------------------------|
|                                                                                                                                                                                                                             |                                                                                         |                                           |                                          | [M+H] <sup>+</sup>                           | [M-H] <sup>-</sup> | Others                                  |
| <div>Cloxacillin</div> <div>CAS registration number: 61-72-3</div> <div>ChemSpider ID: 5873</div> <div>PubChem CID: 6098</div> <div>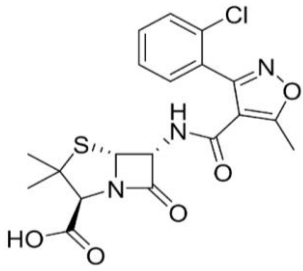</div> | Molecular formula:<br>C <sub>19</sub> H <sub>18</sub> ClN <sub>3</sub> O <sub>5</sub> S | [M+H] <sup>+</sup> ;                      | 436.0729;                                | 122.9996;                                    | 293.0157;          | [M+Na] <sup>+</sup>                     |
|                                                                                                                                                                                                                             |                                                                                         | [M-H] <sup>-</sup> ;                      | 434.0583;                                | 87.0263;                                     | 74.9910;           | 182.0241;                               |
|                                                                                                                                                                                                                             |                                                                                         | [M+Na] <sup>+</sup> ;                     | 458.0548;                                | 178.0052;                                    | 65.9986;           | 299.0189;                               |
|                                                                                                                                                                                                                             | Monoisotopic mass (Da): 435.0650                                                        | [(M+H <sub>2</sub> -CO)+H] <sup>+</sup> ; | 410.0936;                                | 160.0425;                                    | 83.0139;           | 282.0397;                               |
|                                                                                                                                                                                                                             |                                                                                         | [M+H+CH <sub>3</sub> OH] <sup>+</sup>     | 468.0991                                 | 114.0371                                     | 257.0391           | 278.0448;                               |
|                                                                                                                                                                                                                             |                                                                                         |                                           |                                          |                                              |                    | 271.0240                                |
|                                                                                                                                                                                                                             | pKa (strongest acidic): 3.75                                                            |                                           |                                          |                                              |                    | [(M+H <sub>2</sub> -CO)+H] <sup>+</sup> |
|                                                                                                                                                                                                                             |                                                                                         |                                           |                                          |                                              |                    | 174.0583;                               |
|                                                                                                                                                                                                                             | pKa (strongest basic): -0.42                                                            |                                           |                                          |                                              |                    | 128.0528;                               |
|                                                                                                                                                                                                                             |                                                                                         |                                           |                                          |                                              |                    | 364.0881;                               |
|                                                                                                                                                                                                                             | Partition coefficient (Log P): 2.302                                                    |                                           |                                          |                                              |                    | 100.0393;                               |
|                                                                                                                                                                                                                             |                                                                                         |                                           |                                          |                                              |                    | 220.0160                                |
|                                                                                                                                                                                                                             | Intrinsic solubility (mg mL <sup>-1</sup> ): -6.259 (Low)                               |                                           |                                          |                                              |                    | [M+H+CH <sub>3</sub> OH] <sup>+</sup>   |
|                                                                                                                                                                                                                             |                                                                                         |                                           |                                          |                                              |                    | 160.0427;                               |
|                                                                                                                                                                                                                             |                                                                                         |                                           |                                          |                                              |                    | 309.0632;                               |
|                                                                                                                                                                                                                             |                                                                                         |                                           |                                          |                                              |                    | 436.0728;                               |
|                                                                                                                                                                                                                             |                                                                                         |                                           |                                          |                                              |                    | 232.0636                                |

| Group/Class - Pharmacologically active Substance                                                                                                                                                                                              | Physicochemical properties                                                                            | Monitored ion                             | Theoretical exact mass MS ( <i>m/z</i> ) | Fragment ions ( <i>m/z</i> ) MS <sup>2</sup> |                    |                                                      |
|-----------------------------------------------------------------------------------------------------------------------------------------------------------------------------------------------------------------------------------------------|-------------------------------------------------------------------------------------------------------|-------------------------------------------|------------------------------------------|----------------------------------------------|--------------------|------------------------------------------------------|
|                                                                                                                                                                                                                                               |                                                                                                       |                                           |                                          | [M+H] <sup>+</sup>                           | [M-H] <sup>-</sup> | Others                                               |
| <div>Dicloxacillin</div> <div>CAS registration number:<br/>3116-76-5</div> <div>ChemSpider ID:<br/>17358</div> <div>PubChem CID:<br/>18381</div> <div>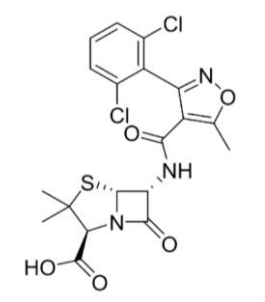</div> | Molecular formula:<br>C <sub>19</sub> H <sub>17</sub> Cl <sub>2</sub> N <sub>3</sub> O <sub>5</sub> S | [M+H] <sup>+</sup> ;                      | 470.0339;                                | 160.0427;                                    | 326.9767;          | [M+Na] <sup>+</sup>                                  |
|                                                                                                                                                                                                                                               |                                                                                                       | [M-H] <sup>-</sup> ;                      | 468.0193;                                | 114.0372;                                    | 291.0000;          | 332.9794;                                            |
|                                                                                                                                                                                                                                               |                                                                                                       | [M+Na] <sup>+</sup> ;                     | 492.0158                                 | 87.0263;                                     | 83.0140;           | 182.0243;                                            |
|                                                                                                                                                                                                                                               | Monoisotopic mass (Da): 469.0261                                                                      | [(M+H <sub>2</sub> -CO)+H] <sup>+</sup> ; | 444.0546;                                | 156.9606;                                    | 65.9986;           | 316.0007;                                            |
|                                                                                                                                                                                                                                               |                                                                                                       | [M+H+CH <sub>3</sub> OH] <sup>+</sup>     | 502.0601                                 | 108.9840                                     | 72.9992            | 312.0058                                             |
|                                                                                                                                                                                                                                               | pKa (strongest acidic):<br>3.75                                                                       |                                           |                                          |                                              |                    | [(M+H <sub>2</sub> -CO)+H] <sup>+</sup><br>174.0583; |
|                                                                                                                                                                                                                                               |                                                                                                       |                                           |                                          |                                              |                    | 128.0528;                                            |
|                                                                                                                                                                                                                                               | pKa (strongest basic):<br>-0.71                                                                       |                                           |                                          |                                              |                    | 312.0301;                                            |
|                                                                                                                                                                                                                                               |                                                                                                       |                                           |                                          |                                              |                    | 398.0491;                                            |
|                                                                                                                                                                                                                                               | Partition coefficient (Log P): 2.906                                                                  |                                           |                                          |                                              |                    | 271.0031                                             |
|                                                                                                                                                                                                                                               | Intrinsic solubility (mg mL <sup>-1</sup> ):<br>-6.893 (Low)                                          |                                           |                                          |                                              |                    | [M+H+CH <sub>3</sub> OH] <sup>+</sup><br>160.0427;   |
|                                                                                                                                                                                                                                               |                                                                                                       |                                           |                                          |                                              |                    | 470.0339;                                            |
|                                                                                                                                                                                                                                               |                                                                                                       |                                           |                                          |                                              |                    | 343.0242;                                            |
|                                                                                                                                                                                                                                               |                                                                                                       |                                           |                                          |                                              |                    | 232.0636                                             |

| Group/Class - Pharmacologically active Substance                                                                                                                                                       | Physicochemical properties                                                            | Monitored ion                                                                          | Theoretical exact mass MS ( <i>m/z</i> ) | Fragment ions ( <i>m/z</i> ) MS <sup>2</sup>                |                                                            |                                                                                                         |
|--------------------------------------------------------------------------------------------------------------------------------------------------------------------------------------------------------|---------------------------------------------------------------------------------------|----------------------------------------------------------------------------------------|------------------------------------------|-------------------------------------------------------------|------------------------------------------------------------|---------------------------------------------------------------------------------------------------------|
|                                                                                                                                                                                                        |                                                                                       |                                                                                        |                                          | [M+H] <sup>+</sup>                                          | [M-H] <sup>-</sup>                                         | Others                                                                                                  |
| <i>Nafcillin</i><br><br>CAS registration number: 147-52-4<br><br>ChemSpider ID: 8634<br><br>PubChem CID: 8982<br><br>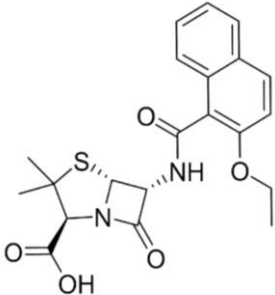 | Molecular formula:<br>C <sub>21</sub> H <sub>22</sub> N <sub>2</sub> O <sub>5</sub> S | [M+H] <sup>+</sup> ;<br>[M-H] <sup>-</sup> ;<br>[(M+H <sub>2</sub> CO)+H] <sup>+</sup> | 415.1322;<br>413.1177;<br>389.1530       | 199.0754;<br>115.0542;<br>171.0441;<br>143.0491;<br>89.0386 | 272.0751;<br>243.0359;<br>72.9992;<br>115.0553;<br>70.9835 | [(M+H <sub>2</sub> -CO)+H] <sup>+</sup><br>199.0754;<br>372.1264;<br>343.1475;<br>115.0542;<br>143.0491 |
|                                                                                                                                                                                                        | Monoisotopic mass (Da): 414.1244                                                      |                                                                                        |                                          |                                                             |                                                            |                                                                                                         |
|                                                                                                                                                                                                        | pKa (strongest acidic): 3.31                                                          |                                                                                        |                                          |                                                             |                                                            |                                                                                                         |
|                                                                                                                                                                                                        | pKa (strongest basic): -1.88                                                          |                                                                                        |                                          |                                                             |                                                            |                                                                                                         |
|                                                                                                                                                                                                        | Partition coefficient (Log P): 2.289                                                  |                                                                                        |                                          |                                                             |                                                            |                                                                                                         |
|                                                                                                                                                                                                        | Intrinsic solubility (mg mL <sup>-1</sup> ): -7.052 (Low)                             |                                                                                        |                                          |                                                             |                                                            |                                                                                                         |
|                                                                                                                                                                                                        |                                                                                       |                                                                                        |                                          |                                                             |                                                            |                                                                                                         |

| Group/Class - Pharmacologically active Substance                                                                                                                                                      | Physicochemical properties                                                            | Monitored ion                                | Theoretical exact mass MS ( <i>m/z</i> ) | Fragment ions ( <i>m/z</i> ) MS <sup>2</sup> |                       |                                                      |
|-------------------------------------------------------------------------------------------------------------------------------------------------------------------------------------------------------|---------------------------------------------------------------------------------------|----------------------------------------------|------------------------------------------|----------------------------------------------|-----------------------|------------------------------------------------------|
|                                                                                                                                                                                                       |                                                                                       |                                              |                                          | [M+H] <sup>+</sup>                           | [M-H] <sup>-</sup>    | Others                                               |
| <i>Oxacillin</i><br><br>CAS registration number: 66-79-5<br><br>ChemSpider ID: 5961<br><br>PubChem CID: 6196<br><br>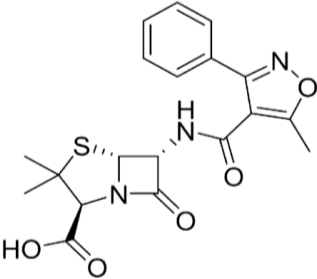 | Molecular formula:<br>C <sub>19</sub> H <sub>19</sub> N <sub>3</sub> O <sub>5</sub> S | [M+H] <sup>+</sup> ;<br>[M-H] <sup>-</sup> ; | 402.1118;<br>400.0973;                   | 160.0427;<br>114.0372;                       | 259.0547;<br>74.9910; | [(M+H <sub>2</sub> -CO)+H] <sup>+</sup><br>174.0583; |
|                                                                                                                                                                                                       |                                                                                       | [(M+H <sub>2</sub> -CO)+H] <sup>+</sup>      | 376.1326                                 | 95.0490;                                     | 65.9985;              | 128.0528;                                            |
|                                                                                                                                                                                                       | Monoisotopic mass (Da): 401.1040                                                      |                                              |                                          | 243.0764;<br>87.0263                         | 83.0139;<br>70.9835   | 330.1271;<br>186.0548;                               |
|                                                                                                                                                                                                       |                                                                                       |                                              |                                          |                                              |                       | 144.0444                                             |
|                                                                                                                                                                                                       | pKa (strongest acidic): 3.75                                                          |                                              |                                          |                                              |                       |                                                      |
|                                                                                                                                                                                                       | pKa (strongest basic): -0.12                                                          |                                              |                                          |                                              |                       |                                                      |
|                                                                                                                                                                                                       | Partition coefficient (Log P): 1.698                                                  |                                              |                                          |                                              |                       |                                                      |
|                                                                                                                                                                                                       | Intrinsic solubility (mg mL <sup>-1</sup> ): -5.606 (Low)                             |                                              |                                          |                                              |                       |                                                      |

| Group/Class - Pharmacologically active Substance                                 | Physicochemical properties                                                            | Monitored ion                                                       | Theoretical exact mass MS ( <i>m/z</i> ) | Fragment ions ( <i>m/z</i> ) MS <sup>2</sup> |                                     |                                               |
|----------------------------------------------------------------------------------|---------------------------------------------------------------------------------------|---------------------------------------------------------------------|------------------------------------------|----------------------------------------------|-------------------------------------|-----------------------------------------------|
|                                                                                  |                                                                                       |                                                                     |                                          | [M+H] <sup>+</sup>                           | [M-H] <sup>-</sup>                  | Others                                        |
| <i>Benzylpenicillin</i>                                                          | Molecular formula:<br>C <sub>16</sub> H <sub>18</sub> N <sub>2</sub> O <sub>4</sub> S | [M+H] <sup>+</sup> ;<br>[M-H] <sup>-</sup> ;<br>[M+Na] <sup>+</sup> | 335.1060;<br>333.0915;<br>357.0880       | 189.0692;<br>176.0706;<br>160.0427;          | 192.0489;<br>255.1128;<br>171.0598; | [M+Na] <sup>+</sup><br>181.0733;<br>182.0246; |
| CAS registration number:<br>61-33-6                                              | Monoisotopic mass<br>(Da): 334.0982                                                   |                                                                     |                                          | 114.0372;<br>91.05417                        | 289.1017                            | 198.0525;<br>239.0791;<br>313.0981            |
| ChemSpider ID:<br>5693                                                           | pKa (strongest acidic):<br>3.53                                                       |                                                                     |                                          |                                              |                                     |                                               |
| PubChem CID:<br>5904                                                             | pKa (strongest basic): -                                                              |                                                                     |                                          |                                              |                                     |                                               |
| 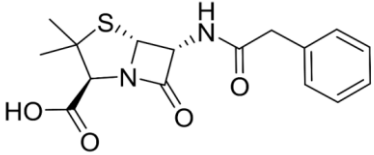 | Partition coefficient<br>(Log P): 1.081                                               |                                                                     |                                          |                                              |                                     |                                               |
|                                                                                  | Intrinsic solubility<br>(mg mL <sup>-1</sup> ): -4.555<br>(Low)                       |                                                                     |                                          |                                              |                                     |                                               |

| Group/Class - Pharmacologically active Substance                                                                                                                                                                                              | Physicochemical properties                                                         | Monitored ion                                                         | Theoretical exact mass MS ( <i>m/z</i> ) | Fragment ions ( <i>m/z</i> ) MS <sup>2</sup> |                                    |                                                      |
|-----------------------------------------------------------------------------------------------------------------------------------------------------------------------------------------------------------------------------------------------|------------------------------------------------------------------------------------|-----------------------------------------------------------------------|------------------------------------------|----------------------------------------------|------------------------------------|------------------------------------------------------|
|                                                                                                                                                                                                                                               |                                                                                    |                                                                       |                                          | [M+H] <sup>+</sup>                           | [M-H] <sup>-</sup>                 | Others                                               |
| <i>Phenoxymethylpenicillin/Phenoxymethyl V penicillin</i><br><br>CAS registration number: 87-08-1<br><br>ChemSpider ID: 6607<br><br>PubChem CID: 6869<br><br>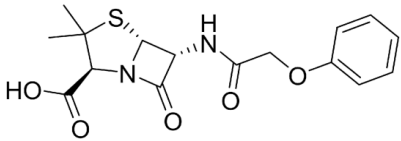 | Molecular formula: C <sub>16</sub> H <sub>18</sub> N <sub>2</sub> O <sub>5</sub> S | [M+H] <sup>+</sup> ;<br>[M-H] <sup>-</sup> ;<br>[M+Na] <sup>+</sup> ; | 351.1009;<br>349.0864;<br>373.0829;      | 87.0263;<br>160.0425;<br>114.0371;           | 93.0346;<br>208.0438;<br>114.0019; | [M+Na] <sup>+</sup><br>214.0475;<br>182.0243;        |
|                                                                                                                                                                                                                                               | Monoisotopic mass (Da): 350.0931                                                   | [(M+H <sub>2</sub> CO)+H] <sup>+</sup>                                | 325.1217                                 | 70.0651;<br>105.0447                         | 65.0397;<br>211.0547               | 269.1260;<br>245.0879;<br>303.0563                   |
|                                                                                                                                                                                                                                               | pKa (strongest acidic): 3.39                                                       |                                                                       |                                          |                                              |                                    | [(M+H <sub>2</sub> -CO)+H] <sup>+</sup><br>279.1162; |
|                                                                                                                                                                                                                                               | pKa (strongest basic): -                                                           |                                                                       |                                          |                                              |                                    | 193.0972;<br>174.0583;                               |
|                                                                                                                                                                                                                                               | Partition coefficient (Log P): 0.763                                               |                                                                       |                                          |                                              |                                    | 128.0528;<br>100.0393                                |
|                                                                                                                                                                                                                                               | Intrinsic solubility (mg mL <sup>-1</sup> ): -4.957 (Low)                          |                                                                       |                                          |                                              |                                    |                                                      |

| Group/Class - Pharmacologically active Substance                                  | Physicochemical properties                                                              | Monitored ion                              | Theoretical exact mass MS ( <i>m/z</i> ) | Fragment ions ( <i>m/z</i> ) MS <sup>2</sup>                 |                                                              |        |
|-----------------------------------------------------------------------------------|-----------------------------------------------------------------------------------------|--------------------------------------------|------------------------------------------|--------------------------------------------------------------|--------------------------------------------------------------|--------|
|                                                                                   |                                                                                         |                                            |                                          | [M+H] <sup>+</sup>                                           | [M-H] <sup>-</sup>                                           | Others |
| Antimicrobials/Lincosamides                                                       |                                                                                         |                                            |                                          |                                                              |                                                              |        |
| Clindamycin                                                                       | Molecular formula:<br>C <sub>18</sub> H <sub>33</sub> ClN <sub>2</sub> O <sub>5</sub> S | [M+H] <sup>+</sup> ;<br>[M-H] <sup>-</sup> | 425.1872;<br>423.1726                    | 126.1277;<br>377.1838;<br>389.2105;<br>407.1766;<br>299.1965 | 387.1948;<br>279.1703;<br>251.1772;<br>223.1805;<br>263.1772 |        |
| CAS registration number:<br>13441-63-9                                            | Monoisotopic mass (Da): 424.1793                                                        |                                            |                                          |                                                              |                                                              |        |
| ChemSpider ID:<br>393915                                                          | pKa (strongest acidic):<br>12.41                                                        |                                            |                                          |                                                              |                                                              |        |
| PubChem CID:<br>446598                                                            | pKa (strongest basic):<br>7.55                                                          |                                            |                                          |                                                              |                                                              |        |
| 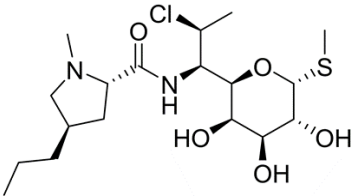 | Partition coefficient (Log P): 1.038                                                    |                                            |                                          |                                                              |                                                              |        |
|                                                                                   | Intrinsic solubility (mg mL <sup>-1</sup> ): -3.463 (High)                              |                                            |                                          |                                                              |                                                              |        |

| Group/Class - Pharmacologically active Substance                                 | Physicochemical properties                                                            | Monitored ion                              | Theoretical exact mass<br>MS ( <i>m/z</i> ) | Fragment ions ( <i>m/z</i> ) MS <sup>2</sup>               |                                                            |        |
|----------------------------------------------------------------------------------|---------------------------------------------------------------------------------------|--------------------------------------------|---------------------------------------------|------------------------------------------------------------|------------------------------------------------------------|--------|
|                                                                                  |                                                                                       |                                            |                                             | [M+H] <sup>+</sup>                                         | [M-H] <sup>-</sup>                                         | Others |
| <i>Lincomycin</i>                                                                | Molecular formula:<br>C <sub>18</sub> H <sub>34</sub> N <sub>2</sub> O <sub>6</sub> S | [M+H] <sup>+</sup> ;<br>[M-H] <sup>-</sup> | 407.2210;<br>405.2065                       | 389.2101;<br>359.2173;<br>126.1277;<br>70.0651;<br>82.0651 | 405.2065;<br>169.1346;<br>127.0401;<br>71.0139;<br>85.0295 |        |
| CAS registration number:<br>154-21-2                                             | Monoisotopic mass<br>(Da): 406.2132                                                   |                                            |                                             |                                                            |                                                            |        |
| ChemSpider ID:<br>2272112                                                        | pKa (strongest acidic):<br>12.37                                                      |                                            |                                             |                                                            |                                                            |        |
| PubChem CID:<br>3000540                                                          | pKa (strongest basic):<br>7.97                                                        |                                            |                                             |                                                            |                                                            |        |
| 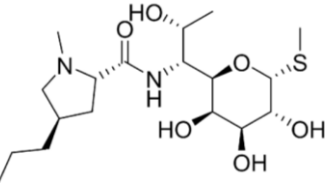 | Partition coefficient<br>(Log P): -0.317                                              |                                            |                                             |                                                            |                                                            |        |
|                                                                                  | Intrinsic solubility<br>(mg mL <sup>-1</sup> ): -2.386<br>(High)                      |                                            |                                             |                                                            |                                                            |        |



| Group/Class - Pharmacologically active Substance                                  | Physicochemical properties                                                           | Monitored ion                                | Theoretical exact mass MS ( <i>m/z</i> ) | Fragment ions ( <i>m/z</i> ) MS <sup>2</sup> |                    |                                                |
|-----------------------------------------------------------------------------------|--------------------------------------------------------------------------------------|----------------------------------------------|------------------------------------------|----------------------------------------------|--------------------|------------------------------------------------|
|                                                                                   |                                                                                      |                                              |                                          | [M+H] <sup>+</sup>                           | [M-H] <sup>-</sup> | Others                                         |
| Antimicrobials/Macrolides                                                         |                                                                                      |                                              |                                          |                                              |                    |                                                |
| <i>Azithromycin</i>                                                               | Molecular formula:<br>C <sub>38</sub> H <sub>72</sub> N <sub>2</sub> O <sub>12</sub> | [M+H] <sup>+</sup> ;<br>[M+2H] <sup>2+</sup> | 749.5158;<br>375.2615                    | 591.4215;<br>158.1176;<br>116.1070;          |                    | [M+2H] <sup>2+</sup><br>158.1176;<br>591.4215; |
| CAS registration number:<br>83905-01-5                                            | Monoisotopic mass (Da): 748.5080                                                     |                                              |                                          | 83.0491;<br>72.0808                          |                    | 83.0491;<br>116.1070                           |
| ChemSpider ID:<br>10482163                                                        | pKa (strongest acidic):<br>12.46                                                     |                                              |                                          |                                              |                    |                                                |
| PubChem CID:<br>447043                                                            | pKa (strongest basic):<br>11.16                                                      |                                              |                                          |                                              |                    |                                                |
| 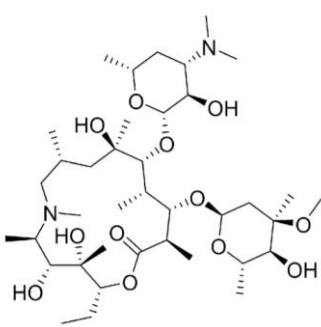 | Partition coefficient (Log P): 2.183                                                 |                                              |                                          |                                              |                    |                                                |
|                                                                                   | Intrinsic solubility (mg mL <sup>-1</sup> ): -1.617 (High)                           |                                              |                                          |                                              |                    |                                                |
|                                                                                   |                                                                                      |                                              |                                          |                                              |                    |                                                |



| Group/Class - Pharmacologically active Substance                                                                                     | Physicochemical properties                                                                                                                                                                                                                                                                                      | Monitored ion                                                                                                   | Theoretical exact mass MS ( <i>m/z</i> )        | Fragment ions ( <i>m/z</i> ) MS <sup>2</sup>              |                                                              |                                                                                                                                                                                                                                      |
|--------------------------------------------------------------------------------------------------------------------------------------|-----------------------------------------------------------------------------------------------------------------------------------------------------------------------------------------------------------------------------------------------------------------------------------------------------------------|-----------------------------------------------------------------------------------------------------------------|-------------------------------------------------|-----------------------------------------------------------|--------------------------------------------------------------|--------------------------------------------------------------------------------------------------------------------------------------------------------------------------------------------------------------------------------------|
|                                                                                                                                      |                                                                                                                                                                                                                                                                                                                 |                                                                                                                 |                                                 | [M+H] <sup>+</sup>                                        | [M-H] <sup>-</sup>                                           | Others                                                                                                                                                                                                                               |
| <i>Spiramycin (Spiramycin I)</i><br><br>CAS registration number: 8025-81-8<br><br>ChemSpider ID: 4451378<br><br>PubChem CID: 5356392 | Molecular formula: C <sub>43</sub> H <sub>74</sub> N <sub>2</sub> O <sub>14</sub><br><br>Monoisotopic mass (Da): 842.5135<br><br>pKa (strongest acidic): 12.53<br><br>pKa (strongest basic): 9.33<br><br>Partition coefficient (Log P): 2.496<br><br>Intrinsic solubility (mg mL <sup>-1</sup> ): -0.929 (High) | [M+H] <sup>+</sup> ;<br>[M-H] <sup>-</sup> ;<br>[M+2H] <sup>2+</sup> ;<br>[M+H+CH <sub>3</sub> OH] <sup>+</sup> | 843.5213;<br>841.5067;<br>422.2643;<br>875.5475 | 174.1125;<br>83.0491;<br>73.0522;<br>101.0597;<br>88.0757 | 823.4951;<br>488.3007;<br>506.3112;<br>474.2580;<br>334.1860 | [M+2H] <sup>2+</sup><br>101.0597;<br>145.0859;<br>174.1125;<br>142.1226<br><br><br><br><br><br><br><br><br><br><br><br><br><br>[M+H+CH <sub>3</sub> OH] <sup>+</sup><br>145.0859;<br>174.1125;<br>232.1543;<br>318.1911;<br>142.1226 |

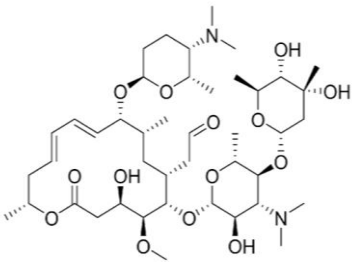



| Group/Class - Pharmacologically active Substance                                                                                                                                                                                                        | Physicochemical properties                                                                                                                                                                                                                                                                                                                | Monitored ion      | Theoretical exact mass MS ( <i>m/z</i> ) | Fragment ions ( <i>m/z</i> ) MS <sup>2</sup>                |                    |        |
|---------------------------------------------------------------------------------------------------------------------------------------------------------------------------------------------------------------------------------------------------------|-------------------------------------------------------------------------------------------------------------------------------------------------------------------------------------------------------------------------------------------------------------------------------------------------------------------------------------------|--------------------|------------------------------------------|-------------------------------------------------------------|--------------------|--------|
|                                                                                                                                                                                                                                                         |                                                                                                                                                                                                                                                                                                                                           |                    |                                          | [M+H] <sup>+</sup>                                          | [M-H] <sup>-</sup> | Others |
| <div>Tylosin (Tylosin A)</div> <div>CAS registration number:<br/>1401-69-0</div> <div>ChemSpider ID:<br/>4444097</div> <div>PubChem CID:<br/>5280440</div> <div>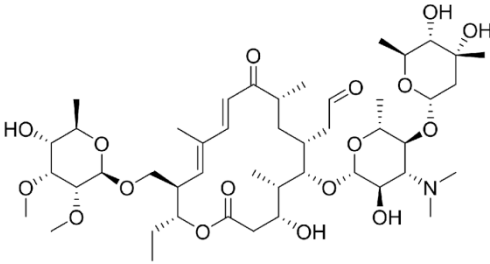</div> | <div>Molecular formula:<br/>C<sub>46</sub>H<sub>77</sub>NO<sub>17</sub></div> <div>Monoisotopic mass (Da): 915.5186</div> <div>pKa (strongest acidic):<br/>12.45</div> <div>pKa (strongest basic):<br/>8.43</div> <div>Partition coefficient (Log P): 2.316</div> <div>Intrinsic solubility (mg mL<sup>-1</sup>):<br/>-1.206 (High)</div> | [M+H] <sup>+</sup> | 916.5264                                 | 174.1123;<br>145.0858;<br>132.1018;<br>101.0596;<br>83.0491 |                    |        |

| Group/Class - Pharmacologically active Substance                                  | Physicochemical properties                                                          | Monitored ion      | Theoretical exact mass MS ( <i>m/z</i> ) | Fragment ions ( <i>m/z</i> ) MS <sup>2</sup> |                    |        |
|-----------------------------------------------------------------------------------|-------------------------------------------------------------------------------------|--------------------|------------------------------------------|----------------------------------------------|--------------------|--------|
|                                                                                   |                                                                                     |                    |                                          | [M+H] <sup>+</sup>                           | [M-H] <sup>-</sup> | Others |
| Antimicrobials/Quinolones-Fluoroquinolones                                        |                                                                                     |                    |                                          |                                              |                    |        |
| <i>Nalidixic acid</i>                                                             | Molecular formula:<br>C <sub>12</sub> H <sub>12</sub> N <sub>2</sub> O <sub>3</sub> | [M+H] <sup>+</sup> | 233.0921                                 | 205.0608;                                    |                    |        |
| CAS registration number:<br>389-08-2                                              |                                                                                     |                    |                                          | 104.0495;                                    |                    |        |
|                                                                                   |                                                                                     |                    |                                          | 159.0553;                                    |                    |        |
| ChemSpider ID:<br>4268                                                            | Monoisotopic mass (Da): 232.0842                                                    |                    |                                          | 131.0604;                                    |                    |        |
|                                                                                   |                                                                                     |                    |                                          | 187.0502                                     |                    |        |
|                                                                                   | pKa (strongest acidic):<br>5.95                                                     |                    |                                          |                                              |                    |        |
| PubChem CID:<br>4421                                                              | pKa (strongest basic):<br>4.68                                                      |                    |                                          |                                              |                    |        |
| 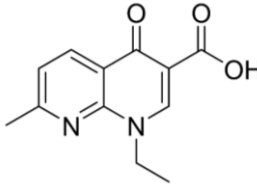 | Partition coefficient (Log P): 0.873                                                |                    |                                          |                                              |                    |        |
|                                                                                   | Intrinsic solubility (mg mL <sup>-1</sup> ):<br>-2.016 (High)                       |                    |                                          |                                              |                    |        |

| Group/Class - Pharmacologically active Substance                                                                                                                                                            | Physicochemical properties                                                                                                                                                                                                                                                                  | Monitored ion      | Theoretical exact mass MS ( <i>m/z</i> ) | Fragment ions ( <i>m/z</i> ) MS <sup>2</sup>                 |                    |        |
|-------------------------------------------------------------------------------------------------------------------------------------------------------------------------------------------------------------|---------------------------------------------------------------------------------------------------------------------------------------------------------------------------------------------------------------------------------------------------------------------------------------------|--------------------|------------------------------------------|--------------------------------------------------------------|--------------------|--------|
|                                                                                                                                                                                                             |                                                                                                                                                                                                                                                                                             |                    |                                          | [M+H] <sup>+</sup>                                           | [M-H] <sup>-</sup> | Others |
| <i>Oxolinic acid</i><br><br>CAS registration number: 14698-29-4<br><br>ChemSpider ID: 4467<br><br>PubChem CID: 4628<br><br>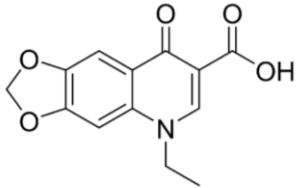 | Molecular formula: C <sub>13</sub> H <sub>11</sub> NO <sub>5</sub><br><br>Monoisotopic mass (Da): 261.0632<br><br>pKa (strongest acidic): 5.58<br><br>pKa (strongest basic): -<br><br>Partition coefficient (Log P): 1.36<br><br>Intrinsic solubility (mg mL <sup>-1</sup> ): -2.338 (High) | [M+H] <sup>+</sup> | 262.0710                                 | 244.0602;<br>234.0397;<br>130.0651;<br>160.0393;<br>172.0393 |                    |        |

| Group/Class - Pharmacologically active Substance                                                                                                                                                            | Physicochemical properties                                                                                                                                                                                                                                                                                     | Monitored ion      | Theoretical exact mass MS ( <i>m/z</i> ) | Fragment ions ( <i>m/z</i> ) MS <sup>2</sup>                 |                    |        |
|-------------------------------------------------------------------------------------------------------------------------------------------------------------------------------------------------------------|----------------------------------------------------------------------------------------------------------------------------------------------------------------------------------------------------------------------------------------------------------------------------------------------------------------|--------------------|------------------------------------------|--------------------------------------------------------------|--------------------|--------|
|                                                                                                                                                                                                             |                                                                                                                                                                                                                                                                                                                |                    |                                          | [M+H] <sup>+</sup>                                           | [M-H] <sup>-</sup> | Others |
| <i>Ciprofloxacin</i><br><br>CAS registration number: 85721-33-1<br><br>ChemSpider ID: 2662<br><br>PubChem CID: 2764<br><br>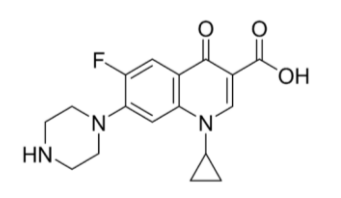 | Molecular formula: C <sub>17</sub> H <sub>18</sub> FN <sub>3</sub> O <sub>3</sub><br><br>Monoisotopic mass (Da): 331.1327<br><br>pKa (strongest acidic): 5.33<br><br>pKa (strongest basic): 8.77<br><br>Partition coefficient (Log P): -0.88<br><br>Intrinsic solubility (mg mL <sup>-1</sup> ): -2.314 (High) | [M+H] <sup>+</sup> | 332.1405                                 | 203.0615;<br>288.1503;<br>231.0558;<br>148.0554;<br>188.0376 |                    |        |



| Group/Class - Pharmacologically active Substance                                                                                                                                                              | Physicochemical properties                                                                                                                                                                                                                                                                                    | Monitored ion      | Theoretical exact mass MS ( <i>m/z</i> ) | Fragment ions ( <i>m/z</i> ) MS <sup>2</sup>               |                    |        |
|---------------------------------------------------------------------------------------------------------------------------------------------------------------------------------------------------------------|---------------------------------------------------------------------------------------------------------------------------------------------------------------------------------------------------------------------------------------------------------------------------------------------------------------|--------------------|------------------------------------------|------------------------------------------------------------|--------------------|--------|
|                                                                                                                                                                                                               |                                                                                                                                                                                                                                                                                                               |                    |                                          | [M+H] <sup>+</sup>                                         | [M-H] <sup>-</sup> | Others |
| <p><i>Danofloxacin</i></p> <p>CAS registration number: 112398-08-0</p> <p>ChemSpider ID: 64439</p> <p>PubChem CID: 71335</p> 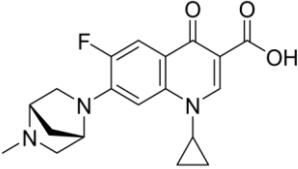 | <p>Molecular formula: C<sub>19</sub>H<sub>20</sub>FN<sub>3</sub>O<sub>3</sub></p> <p>Monoisotopic mass (Da): 357.1483</p> <p>pKa (strongest acidic): 5.26</p> <p>pKa (strongest basic): 7.72</p> <p>Partition coefficient (Log P): -0.386</p> <p>Intrinsic solubility (mg mL<sup>-1</sup>): -2.639 (High)</p> | [M+H] <sup>+</sup> | 358.1562                                 | 82.0651;<br>314.1659;<br>283.1241;<br>255.0564;<br>96.0808 |                    |        |

| Group/Class - Pharmacologically active Substance                                                                                                                                                            | Physicochemical properties                                                                                                                                                                                                                                                                                                  | Monitored ion      | Theoretical exact mass MS ( <i>m/z</i> ) | Fragment ions ( <i>m/z</i> ) MS <sup>2</sup>                |                    |        |
|-------------------------------------------------------------------------------------------------------------------------------------------------------------------------------------------------------------|-----------------------------------------------------------------------------------------------------------------------------------------------------------------------------------------------------------------------------------------------------------------------------------------------------------------------------|--------------------|------------------------------------------|-------------------------------------------------------------|--------------------|--------|
|                                                                                                                                                                                                             |                                                                                                                                                                                                                                                                                                                             |                    |                                          | [M+H] <sup>+</sup>                                          | [M-H] <sup>-</sup> | Others |
| <i>Difloxacin</i><br><br>CAS registration number: 98106-17-3<br><br>ChemSpider ID: 50725<br><br>PubChem CID: 56206<br><br>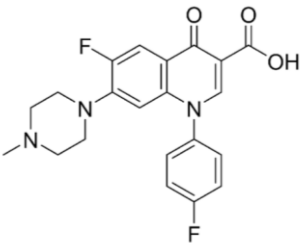 | Molecular formula: C <sub>21</sub> H <sub>19</sub> F <sub>2</sub> N <sub>3</sub> O <sub>3</sub><br><br>Monoisotopic mass (Da): 399.1389<br><br>pKa (strongest acidic): 5.7<br><br>pKa (strongest basic): 8.44<br><br>Partition coefficient (Log P): 0.709<br><br>Intrinsic solubility (mg mL <sup>-1</sup> ): -3.668 (High) | [M+H] <sup>+</sup> | 400.1467                                 | 356.1565;<br>299.0987;<br>227.0538;<br>209.0634;<br>75.0228 |                    |        |

| Group/Class - Pharmacologically active Substance                                                                                                                                                             | Physicochemical properties                                                                                                                                                                                                                                                                                      | Monitored ion                              | Theoretical exact mass MS ( <i>m/z</i> ) | Fragment ions ( <i>m/z</i> ) MS <sup>2</sup>                 |                                                              |        |
|--------------------------------------------------------------------------------------------------------------------------------------------------------------------------------------------------------------|-----------------------------------------------------------------------------------------------------------------------------------------------------------------------------------------------------------------------------------------------------------------------------------------------------------------|--------------------------------------------|------------------------------------------|--------------------------------------------------------------|--------------------------------------------------------------|--------|
|                                                                                                                                                                                                              |                                                                                                                                                                                                                                                                                                                 |                                            |                                          | [M+H] <sup>+</sup>                                           | [M-H] <sup>-</sup>                                           | Others |
| <i>Enrofloxacin</i><br><br>CAS registration number: 93106-60-6<br><br>ChemSpider ID: 64326<br><br>PubChem CID: 71188<br><br>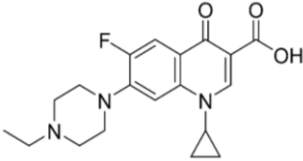 | Molecular formula: C <sub>19</sub> H <sub>22</sub> FN <sub>3</sub> O <sub>3</sub><br><br>Monoisotopic mass (Da): 359.1640<br><br>pKa (strongest acidic): 5.32<br><br>pKa (strongest basic): 8.72<br><br>Partition coefficient (Log P): -0.359<br><br>Intrinsic solubility (mg mL <sup>-1</sup> ): -2.415 (High) | [M+H] <sup>+</sup> ;<br>[M-H] <sup>-</sup> | 360.1718;<br>358.1572                    | 316.1816;<br>245.1082;<br>189.0459;<br>203.0613;<br>148.0556 | 189.0472;<br>314.1674;<br>274.1362;<br>182.0614;<br>220.0779 |        |

| Group/Class - Pharmacologically active Substance                                                                                                                                                         | Physicochemical properties                                                                                                                                                                                                                                                                   | Monitored ion      | Theoretical exact mass MS ( <i>m/z</i> ) | Fragment ions ( <i>m/z</i> ) MS <sup>2</sup>               |                    |        |
|----------------------------------------------------------------------------------------------------------------------------------------------------------------------------------------------------------|----------------------------------------------------------------------------------------------------------------------------------------------------------------------------------------------------------------------------------------------------------------------------------------------|--------------------|------------------------------------------|------------------------------------------------------------|--------------------|--------|
|                                                                                                                                                                                                          |                                                                                                                                                                                                                                                                                              |                    |                                          | [M+H] <sup>+</sup>                                         | [M-H] <sup>-</sup> | Others |
| <i>Flumequine</i><br><br>CAS registration number: 42835-25-6<br><br>ChemSpider ID: 3257<br><br>PubChem CID: 3374<br><br>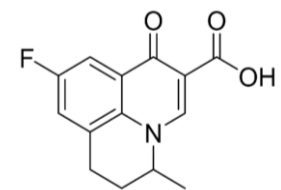 | Molecular formula: C <sub>14</sub> H <sub>12</sub> FNO <sub>3</sub><br><br>Monoisotopic mass (Da): 261.0796<br><br>pKa (strongest acidic): 5.6<br><br>pKa (strongest basic): -<br><br>Partition coefficient (Log P): 2.424<br><br>Intrinsic solubility (mg mL <sup>-1</sup> ): -2.583 (High) | [M+H] <sup>+</sup> | 262.0874                                 | 238.0499;<br>98.0152;<br>220.0404;<br>262.0874;<br>99.0077 |                    |        |

| Group/Class - Pharmacologically active Substance                                                                                                                                                          | Physicochemical properties                                                                                                                                                                                                                                                                                      | Monitored ion      | Theoretical exact mass MS ( <i>m/z</i> ) | Fragment ions ( <i>m/z</i> ) MS <sup>2</sup>                 |                    |        |
|-----------------------------------------------------------------------------------------------------------------------------------------------------------------------------------------------------------|-----------------------------------------------------------------------------------------------------------------------------------------------------------------------------------------------------------------------------------------------------------------------------------------------------------------|--------------------|------------------------------------------|--------------------------------------------------------------|--------------------|--------|
|                                                                                                                                                                                                           |                                                                                                                                                                                                                                                                                                                 |                    |                                          | [M+H] <sup>+</sup>                                           | [M-H] <sup>-</sup> | Others |
| <i>Norfloxacin</i><br><br>CAS registration number: 70458-96-7<br><br>ChemSpider ID: 4380<br><br>PubChem CID: 4539<br><br>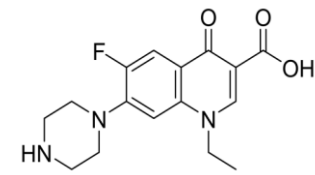 | Molecular formula: C <sub>16</sub> H <sub>18</sub> FN <sub>3</sub> O <sub>3</sub><br><br>Monoisotopic mass (Da): 319.1327<br><br>pKa (strongest acidic): 5.34<br><br>pKa (strongest basic): 8.77<br><br>Partition coefficient (Log P): -0.988<br><br>Intrinsic solubility (mg mL <sup>-1</sup> ): -2.087 (High) | [M+H] <sup>+</sup> | 320.1405                                 | 276.1503;<br>256.1440;<br>233.1082;<br>219.0926;<br>205.0770 |                    |        |

| Group/Class - Pharmacologically active Substance                                                                                                                                                              | Physicochemical properties                                                                                                                                                                                                                                                                                                      | Monitored ion      | Theoretical exact mass MS ( <i>m/z</i> ) | Fragment ions ( <i>m/z</i> ) MS <sup>2</sup>                 |                    |        |
|---------------------------------------------------------------------------------------------------------------------------------------------------------------------------------------------------------------|---------------------------------------------------------------------------------------------------------------------------------------------------------------------------------------------------------------------------------------------------------------------------------------------------------------------------------|--------------------|------------------------------------------|--------------------------------------------------------------|--------------------|--------|
|                                                                                                                                                                                                               |                                                                                                                                                                                                                                                                                                                                 |                    |                                          | [M+H] <sup>+</sup>                                           | [M-H] <sup>-</sup> | Others |
| <i>Sarafloxacin</i><br><br>CAS registration number: 98105-99-8<br><br>ChemSpider ID: 50727<br><br>PubChem CID: 56208<br><br>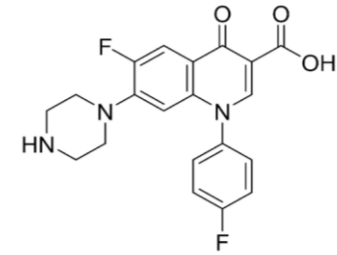 | Molecular formula: C <sub>20</sub> H <sub>17</sub> F <sub>2</sub> N <sub>3</sub> O <sub>3</sub><br><br>Monoisotopic mass (Da): 385.1233<br><br>pKa (strongest acidic): 5.7<br><br>pKa (strongest basic): 8.76<br><br>Partition coefficient (Log P): 0.396<br><br>Intrinsic solubility (mg mL <sup>-1</sup> ): -3.891 (Moderate) | [M+H] <sup>+</sup> | 386.1311                                 | 342.1411;<br>299.0989;<br>285.0832;<br>255.0726;<br>227.0539 |                    |        |

| Group/Class - Pharmacologically active Substance                                 | Physicochemical properties                                                                         | Monitored ion      | Theoretical exact mass MS ( <i>m/z</i> ) | Fragment ions ( <i>m/z</i> ) MS <sup>2</sup> |                    |        |
|----------------------------------------------------------------------------------|----------------------------------------------------------------------------------------------------|--------------------|------------------------------------------|----------------------------------------------|--------------------|--------|
|                                                                                  |                                                                                                    |                    |                                          | [M+H] <sup>+</sup>                           | [M-H] <sup>-</sup> | Others |
| Antimicrobials/Sulphonamides                                                     |                                                                                                    |                    |                                          |                                              |                    |        |
| <i>Sulfachlorpyridazine</i>                                                      | Molecular formula:<br>C <sub>20</sub> H <sub>17</sub> F <sub>2</sub> N <sub>3</sub> O <sub>3</sub> | [M+H] <sup>+</sup> | 386.1311                                 | 342.1411;                                    |                    |        |
| CAS registration number:<br>80-32-0                                              |                                                                                                    |                    |                                          | 299.0989;                                    |                    |        |
|                                                                                  |                                                                                                    |                    |                                          | 285.0832;                                    |                    |        |
| ChemSpider ID:<br>6382                                                           | Monoisotopic mass<br>(Da): 385.1233                                                                |                    |                                          | 255.0726;                                    |                    |        |
|                                                                                  |                                                                                                    |                    |                                          | 227.0539                                     |                    |        |
| PubChem CID:<br>6634                                                             | pKa (strongest acidic):<br>6.6                                                                     |                    |                                          |                                              |                    |        |
|                                                                                  | pKa (strongest basic):<br>2.02                                                                     |                    |                                          |                                              |                    |        |
| 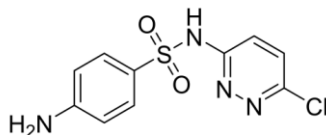 | Partition coefficient<br>(Log P): 0.853                                                            |                    |                                          |                                              |                    |        |
|                                                                                  | Intrinsic solubility<br>(mg mL <sup>-1</sup> ): -3.786<br>(Moderate)                               |                    |                                          |                                              |                    |        |
|                                                                                  |                                                                                                    |                    |                                          |                                              |                    |        |

| Group/Class - Pharmacologically active Substance                                 | Physicochemical properties                                                            | Monitored ion                              | Theoretical exact mass MS ( <i>m/z</i> ) | Fragment ions ( <i>m/z</i> ) MS <sup>2</sup>              |                                                           |        |
|----------------------------------------------------------------------------------|---------------------------------------------------------------------------------------|--------------------------------------------|------------------------------------------|-----------------------------------------------------------|-----------------------------------------------------------|--------|
|                                                                                  |                                                                                       |                                            |                                          | [M+H] <sup>+</sup>                                        | [M-H] <sup>-</sup>                                        | Others |
| <i>Sulfadiazine</i>                                                              | Molecular formula:<br>C <sub>10</sub> H <sub>10</sub> N <sub>4</sub> O <sub>2</sub> S | [M+H] <sup>+</sup> ;<br>[M-H] <sup>-</sup> | 251.0597;<br>249.0452                    | 156.0114;<br>108.0444;<br>96.0556;<br>92.0495;<br>65.0386 | 185.0822;<br>94.0413;<br>93.0335;<br>92.0257;<br>222.0332 |        |
| CAS registration number:<br>68-35-9                                              | Monoisotopic mass (Da): 250.0519                                                      |                                            |                                          |                                                           |                                                           |        |
| ChemSpider ID:<br>5026                                                           | pKa (strongest acidic):<br>6.99                                                       |                                            |                                          |                                                           |                                                           |        |
| PubChem CID:<br>5215                                                             | pKa (strongest basic):<br>2.01                                                        |                                            |                                          |                                                           |                                                           |        |
| 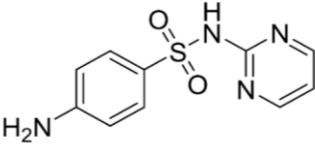 | Partition coefficient (Log P): 0.387                                                  |                                            |                                          |                                                           |                                                           |        |
|                                                                                  | Intrinsic solubility (mg mL <sup>-1</sup> ): -2.499 (High)                            |                                            |                                          |                                                           |                                                           |        |



| Group/Class - Pharmacologically active Substance                                                                                                                                                                      | Physicochemical properties                                                                                                                                                                                                                                                                                                           | Monitored ion                              | Theoretical exact mass<br>MS ( <i>m/z</i> ) | Fragment ions ( <i>m/z</i> ) MS <sup>2</sup>                |                                                            |        |
|-----------------------------------------------------------------------------------------------------------------------------------------------------------------------------------------------------------------------|--------------------------------------------------------------------------------------------------------------------------------------------------------------------------------------------------------------------------------------------------------------------------------------------------------------------------------------|--------------------------------------------|---------------------------------------------|-------------------------------------------------------------|------------------------------------------------------------|--------|
|                                                                                                                                                                                                                       |                                                                                                                                                                                                                                                                                                                                      |                                            |                                             | [M+H] <sup>+</sup>                                          | [M-H] <sup>-</sup>                                         | Others |
| <i>Sulfadimethoxine</i><br><br>CAS registration number:<br>122-11-2<br><br>ChemSpider ID:<br>5132<br><br>PubChem CID:<br>5323<br><br>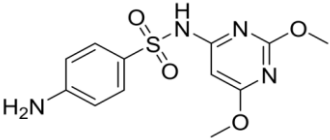 | Molecular formula:<br>C <sub>12</sub> H <sub>14</sub> N <sub>4</sub> O <sub>4</sub> S<br><br>Monoisotopic mass<br>(Da): 310.0730<br><br>pKa (strongest acidic):<br>6.91<br><br>pKa (strongest basic):<br>1.95<br><br>Partition coefficient<br>(Log P): 1.261<br><br>Intrinsic solubility<br>(mg mL <sup>-1</sup> ): -3.599<br>(High) | [M+H] <sup>+</sup> ;<br>[M-H] <sup>-</sup> | 311.0809;<br>309.0663                       | 245.1032;<br>236.0334;<br>156.0768;<br>108.0443;<br>92.0495 | 309.0652;<br>66.0097;<br>65.0144;<br>122.0359;<br>154.0621 |        |

| Group/Class - Pharmacologically active Substance                                 | Physicochemical properties                                                            | Monitored ion                              | Theoretical exact mass MS ( <i>m/z</i> ) | Fragment ions ( <i>m/z</i> ) MS <sup>2</sup> |                                     |        |
|----------------------------------------------------------------------------------|---------------------------------------------------------------------------------------|--------------------------------------------|------------------------------------------|----------------------------------------------|-------------------------------------|--------|
|                                                                                  |                                                                                       |                                            |                                          | [M+H] <sup>+</sup>                           | [M-H] <sup>-</sup>                  | Others |
| <i>Sulfadoxine</i>                                                               | Molecular formula:<br>C <sub>12</sub> H <sub>14</sub> N <sub>4</sub> O <sub>4</sub> S | [M+H] <sup>+</sup> ;<br>[M-H] <sup>-</sup> | 311.0809;<br>309.0663                    | 156.0113;<br>108.0443;<br>92.0495;           | 309.0661;<br>156.0127;<br>294.0428; |        |
| CAS registration number:<br>2447-57-6                                            | Monoisotopic mass (Da): 310.0730                                                      |                                            |                                          | 65.0380;<br>140.0448                         | 279.0193;<br>215.0576               |        |
| ChemSpider ID:<br>16218                                                          | pKa (strongest acidic):<br>6.12                                                       |                                            |                                          |                                              |                                     |        |
| PubChem CID:<br>17134                                                            | pKa (strongest basic):<br>2.41                                                        |                                            |                                          |                                              |                                     |        |
| 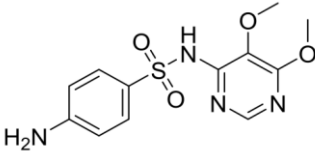 | Partition coefficient (Log P): 0.582                                                  |                                            |                                          |                                              |                                     |        |
|                                                                                  | Intrinsic solubility (mg mL <sup>-1</sup> ): -3.115 (High)                            |                                            |                                          |                                              |                                     |        |

| Group/Class - Pharmacologically active Substance                                 | Physicochemical properties                                                            | Monitored ion                              | Theoretical exact mass MS ( <i>m/z</i> ) | Fragment ions ( <i>m/z</i> ) MS <sup>2</sup> |                                    |        |
|----------------------------------------------------------------------------------|---------------------------------------------------------------------------------------|--------------------------------------------|------------------------------------------|----------------------------------------------|------------------------------------|--------|
|                                                                                  |                                                                                       |                                            |                                          | [M+H] <sup>+</sup>                           | [M-H] <sup>-</sup>                 | Others |
| <i>Sulfisoxazole/Sulfafurazole</i>                                               | Molecular formula:<br>C <sub>11</sub> H <sub>13</sub> N <sub>3</sub> O <sub>3</sub> S | [M+H] <sup>+</sup> ;<br>[M-H] <sup>-</sup> | 268.0750;<br>266.0605                    | 268.0748;<br>156.0113;<br>113.0712;          | 266.0605;<br>171.0233;<br>63.9223; |        |
| CAS registration number:<br>127-69-5                                             | Monoisotopic mass (Da): 267.0672                                                      |                                            |                                          | 108.0447;<br>92.0495                         | 239.0496;<br>79.9811               |        |
| ChemSpider ID:<br>5151                                                           | pKa (strongest acidic):<br>4.81                                                       |                                            |                                          |                                              |                                    |        |
| PubChem CID:<br>5344                                                             | pKa (strongest basic):<br>2.17                                                        |                                            |                                          |                                              |                                    |        |
| 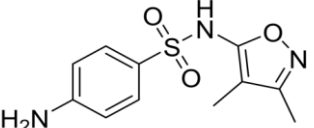 | Partition coefficient (Log P): 0.731                                                  |                                            |                                          |                                              |                                    |        |
|                                                                                  | Intrinsic solubility (mg mL <sup>-1</sup> ): -2.392 (High)                            |                                            |                                          |                                              |                                    |        |

| Group/Class - Pharmacologically active Substance | Physicochemical properties                                                            | Monitored ion                              | Theoretical exact mass MS ( <i>m/z</i> ) | Fragment ions ( <i>m/z</i> ) MS <sup>2</sup> |                                    |        |
|--------------------------------------------------|---------------------------------------------------------------------------------------|--------------------------------------------|------------------------------------------|----------------------------------------------|------------------------------------|--------|
|                                                  |                                                                                       |                                            |                                          | [M+H] <sup>+</sup>                           | [M-H] <sup>-</sup>                 | Others |
| <i>Sulfamerazine</i>                             | Molecular formula:<br>C <sub>11</sub> H <sub>12</sub> N <sub>4</sub> O <sub>2</sub> S | [M+H] <sup>+</sup> ;<br>[M-H] <sup>-</sup> | 265.0754;<br>263.0608                    | 190.0281;<br>156.0113;<br>110.0712;          | 199.0978;<br>108.0570;<br>92.0257; |        |
| CAS registration number:<br>127-79-7             | Monoisotopic mass<br>(Da): 264.0676                                                   |                                            |                                          | 108.0443;<br>92.0495                         | 132.0570;<br>106.0413              |        |
| ChemSpider ID:<br>5134                           | pKa (strongest acidic):<br>6.99                                                       |                                            |                                          |                                              |                                    |        |
| PubChem CID:<br>5325                             | pKa (strongest basic): 2                                                              |                                            |                                          |                                              |                                    |        |
|                                                  | Partition coefficient<br>(Log P): 0.519                                               |                                            |                                          |                                              |                                    |        |
|                                                  | Intrinsic solubility<br>(mg mL <sup>-1</sup> ): -2.66 (High)                          |                                            |                                          |                                              |                                    |        |

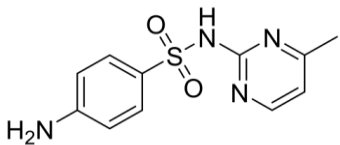

| Group/Class - Pharmacologically active Substance                                 | Physicochemical properties                                                            | Monitored ion                              | Theoretical exact mass MS ( <i>m/z</i> ) | Fragment ions ( <i>m/z</i> ) MS <sup>2</sup> |                                     |        |
|----------------------------------------------------------------------------------|---------------------------------------------------------------------------------------|--------------------------------------------|------------------------------------------|----------------------------------------------|-------------------------------------|--------|
|                                                                                  |                                                                                       |                                            |                                          | [M+H] <sup>+</sup>                           | [M-H] <sup>-</sup>                  | Others |
| <i>Sulfamethazine/Sulfadimidine</i>                                              | Molecular formula:<br>C <sub>12</sub> H <sub>14</sub> N <sub>4</sub> O <sub>2</sub> S | [M+H] <sup>+</sup> ;<br>[M-H] <sup>-</sup> | 279.0910;<br>277.0765                    | 124.0869;<br>92.0495;<br>108.0444;           | 106.0413;<br>196.0175;<br>122.0726; |        |
| CAS registration number:<br>57-68-1                                              | Monoisotopic mass<br>(Da): 278.0832                                                   |                                            |                                          | 186.0332;<br>156.0114                        | 132.0570;<br>236.0488               |        |
| ChemSpider ID: -                                                                 | pKa (strongest acidic):<br>6.99                                                       |                                            |                                          |                                              |                                     |        |
| PubChem CID:<br>5327                                                             | pKa (strongest basic): 2                                                              |                                            |                                          |                                              |                                     |        |
| 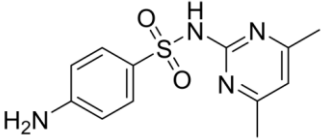 | Partition coefficient<br>(Log P): 0.65                                                |                                            |                                          |                                              |                                     |        |
|                                                                                  | Intrinsic solubility<br>(mg mL <sup>-1</sup> ): -2.818<br>(High)                      |                                            |                                          |                                              |                                     |        |

| Group/Class - Pharmacologically active Substance                                 | Physicochemical properties                                                                       | Monitored ion                              | Theoretical exact mass MS ( <i>m/z</i> ) | Fragment ions ( <i>m/z</i> ) MS <sup>2</sup> |                                    |        |
|----------------------------------------------------------------------------------|--------------------------------------------------------------------------------------------------|--------------------------------------------|------------------------------------------|----------------------------------------------|------------------------------------|--------|
|                                                                                  |                                                                                                  |                                            |                                          | [M+H] <sup>+</sup>                           | [M-H] <sup>-</sup>                 | Others |
| <i>Sulfathiazole</i>                                                             | Molecular formula:<br>C <sub>9</sub> H <sub>9</sub> N <sub>3</sub> O <sub>2</sub> S <sub>2</sub> | [M+H] <sup>+</sup> ;<br>[M-H] <sup>-</sup> | 256.0209;<br>254.0063                    | 156.0114;<br>108.0444;<br>101.0168;          | 156.0125;<br>254.0063;<br>97.9944; |        |
| CAS registration number:<br>72-14-0                                              | Monoisotopic mass (Da): 255.0131                                                                 |                                            |                                          | 92.0495;<br>68.0495                          | 63.9624;<br>65.0145                |        |
| ChemSpider ID:<br>5148                                                           | pKa (strongest acidic):<br>5.73                                                                  |                                            |                                          |                                              |                                    |        |
| PubChem CID:<br>5340                                                             | pKa (strongest basic):<br>2.04                                                                   |                                            |                                          |                                              |                                    |        |
| 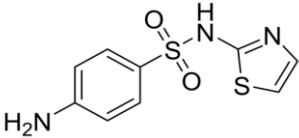 | Partition coefficient (Log P): 0.975                                                             |                                            |                                          |                                              |                                    |        |
|                                                                                  | Intrinsic solubility (mg mL <sup>-1</sup> ): -2.669 (High)                                       |                                            |                                          |                                              |                                    |        |

| Group/Class - Pharmacologically active Substance                                 | Physicochemical properties                                                            | Monitored ion                              | Theoretical exact mass MS ( <i>m/z</i> ) | Fragment ions ( <i>m/z</i> ) MS <sup>2</sup> |                                    |        |
|----------------------------------------------------------------------------------|---------------------------------------------------------------------------------------|--------------------------------------------|------------------------------------------|----------------------------------------------|------------------------------------|--------|
|                                                                                  |                                                                                       |                                            |                                          | [M+H] <sup>+</sup>                           | [M-H] <sup>-</sup>                 | Others |
| <i>Sulfamethoxazole</i>                                                          | Molecular formula:<br>C <sub>10</sub> H <sub>11</sub> N <sub>3</sub> O <sub>3</sub> S | [M+H] <sup>+</sup> ;<br>[M-H] <sup>-</sup> | 254.0594;<br>252.0448                    | 156.0113;<br>147.0791;<br>108.0443;          | 156.0124;<br>252.0449;<br>79.9574; |        |
| CAS registration number:<br>723-46-6                                             | Monoisotopic mass<br>(Da): 253.0516                                                   |                                            |                                          | 99.0553;<br>93.0573                          | 92.0505;<br>108.0454               |        |
| ChemSpider ID:<br>5138                                                           | pKa (strongest acidic):<br>5.86                                                       |                                            |                                          |                                              |                                    |        |
| PubChem CID:<br>5329                                                             | pKa (strongest basic):<br>1.97                                                        |                                            |                                          |                                              |                                    |        |
| 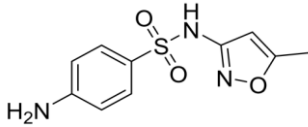 | Partition coefficient<br>(Log P): 0.791                                               |                                            |                                          |                                              |                                    |        |
|                                                                                  | Intrinsic solubility<br>(mg mL <sup>-1</sup> ): -2.202<br>(High)                      |                                            |                                          |                                              |                                    |        |

| Group/Class - Pharmacologically active Substance                                 | Physicochemical properties                                                            | Monitored ion                              | Theoretical exact mass MS ( <i>m/z</i> ) | Fragment ions ( <i>m/z</i> ) MS <sup>2</sup>               |                                                              |        |
|----------------------------------------------------------------------------------|---------------------------------------------------------------------------------------|--------------------------------------------|------------------------------------------|------------------------------------------------------------|--------------------------------------------------------------|--------|
|                                                                                  |                                                                                       |                                            |                                          | [M+H] <sup>+</sup>                                         | [M-H] <sup>-</sup>                                           | Others |
| <i>Sulfaquinoxaline</i>                                                          | Molecular formula:<br>C <sub>14</sub> H <sub>12</sub> N <sub>4</sub> O <sub>2</sub> S | [M+H] <sup>+</sup> ;<br>[M-H] <sup>-</sup> | 301.0754;<br>299.0608                    | 156.0112;<br>146.0712;<br>108.0443;<br>80.0495;<br>92.0495 | 299.0595;<br>144.0565;<br>142.0409;<br>117.0458;<br>115.0300 |        |
| CAS registration number:<br>59-40-5                                              | Monoisotopic mass (Da): 300.0676                                                      |                                            |                                          |                                                            |                                                              |        |
| ChemSpider ID:<br>5147                                                           | pKa (strongest acidic):<br>6.79                                                       |                                            |                                          |                                                            |                                                              |        |
| PubChem CID:<br>5338                                                             | pKa (strongest basic):<br>2.13                                                        |                                            |                                          |                                                            |                                                              |        |
| 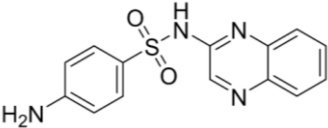 | Partition coefficient (Log P): 1.552                                                  |                                            |                                          |                                                            |                                                              |        |
|                                                                                  | Intrinsic solubility (mg mL <sup>-1</sup> ): -2.917 (High)                            |                                            |                                          |                                                            |                                                              |        |



| Group/Class - Pharmacologically active Substance                                 | Physicochemical properties                                                            | Monitored ion                              | Theoretical exact mass MS ( <i>m/z</i> ) | Fragment ions ( <i>m/z</i> ) MS <sup>2</sup> |                                     |        |
|----------------------------------------------------------------------------------|---------------------------------------------------------------------------------------|--------------------------------------------|------------------------------------------|----------------------------------------------|-------------------------------------|--------|
|                                                                                  |                                                                                       |                                            |                                          | [M+H] <sup>+</sup>                           | [M-H] <sup>-</sup>                  | Others |
| Antimicrobials/Tetracyclines                                                     |                                                                                       |                                            |                                          |                                              |                                     |        |
| Chlortetracycline                                                                | Molecular formula:<br>C <sub>22</sub> H <sub>23</sub> ClN <sub>2</sub> O <sub>8</sub> | [M+H] <sup>+</sup> ;<br>[M-H] <sup>-</sup> | 479.1216;<br>477.1070                    | 462.0936;<br>444.0832;<br>154.0495;          | 392.0905;<br>477.1070;<br>169.0062; |        |
| CAS registration number:<br>57-62-5                                              | Monoisotopic mass (Da): 478.1137                                                      |                                            |                                          | 98.0603;<br>260.0230                         | 65.9986;<br>194.9854                |        |
| ChemSpider ID:<br>10469370                                                       | pKa (strongest acidic):<br>2.98                                                       |                                            |                                          |                                              |                                     |        |
| PubChem CID:<br>54675777                                                         | pKa (strongest basic):<br>8.88                                                        |                                            |                                          |                                              |                                     |        |
| 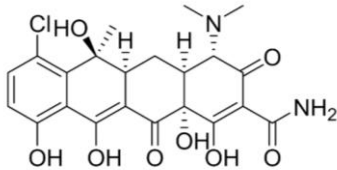 | Partition coefficient (Log P): -2.9                                                   |                                            |                                          |                                              |                                     |        |
|                                                                                  | Intrinsic solubility (mg mL <sup>-1</sup> ): -2.958 (High)                            |                                            |                                          |                                              |                                     |        |

| Group/Class - Pharmacologically active Substance                                                                                                                                                                         | Physicochemical properties                                                                                                                                                                                                                                                                                                    | Monitored ion                              | Theoretical exact mass MS ( <i>m/z</i> ) | Fragment ions ( <i>m/z</i> ) MS <sup>2</sup>                |                                                              |        |
|--------------------------------------------------------------------------------------------------------------------------------------------------------------------------------------------------------------------------|-------------------------------------------------------------------------------------------------------------------------------------------------------------------------------------------------------------------------------------------------------------------------------------------------------------------------------|--------------------------------------------|------------------------------------------|-------------------------------------------------------------|--------------------------------------------------------------|--------|
|                                                                                                                                                                                                                          |                                                                                                                                                                                                                                                                                                                               |                                            |                                          | [M+H] <sup>+</sup>                                          | [M-H] <sup>-</sup>                                           | Others |
| <i>Doxycycline</i><br><br>CAS registration number:<br>564-25-0<br><br>ChemSpider ID:<br>10469369<br><br>PubChem CID:<br>54671203<br><br>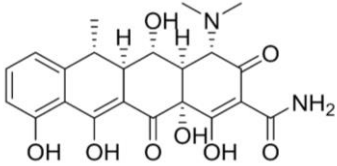 | Molecular formula:<br>C <sub>22</sub> H <sub>24</sub> N <sub>2</sub> O <sub>8</sub><br><br>Monoisotopic mass<br>(Da): 444.1527<br><br>pKa (strongest acidic):<br>7.45<br><br>pKa (strongest basic): 6<br><br>Partition coefficient<br>(Log P): -0.611<br><br>Intrinsic solubility<br>(mg mL <sup>-1</sup> ): -2.746<br>(High) | [M+H] <sup>+</sup> ;<br>[M-H] <sup>-</sup> | 445.1605;<br>443.1460                    | 428.1340;<br>410.1233;<br>98.0600;<br>168.0570;<br>154.0498 | 443.1460;<br>240.0428;<br>358.1296;<br>255.0663;<br>211.0411 |        |

| Group/Class - Pharmacologically active Substance                                                                                                                                                                            | Physicochemical properties                                                                                                                                                                                                                                                                                                      | Monitored ion                              | Theoretical exact mass MS ( <i>m/z</i> ) | Fragment ions ( <i>m/z</i> ) MS <sup>2</sup>                 |                                                             |        |
|-----------------------------------------------------------------------------------------------------------------------------------------------------------------------------------------------------------------------------|---------------------------------------------------------------------------------------------------------------------------------------------------------------------------------------------------------------------------------------------------------------------------------------------------------------------------------|--------------------------------------------|------------------------------------------|--------------------------------------------------------------|-------------------------------------------------------------|--------|
|                                                                                                                                                                                                                             |                                                                                                                                                                                                                                                                                                                                 |                                            |                                          | [M+H] <sup>+</sup>                                           | [M-H] <sup>-</sup>                                          | Others |
| <i>Oxytetracycline</i><br><br>CAS registration number:<br>79-57-2<br><br>ChemSpider ID:<br>10482174<br><br>PubChem CID:<br>54675779<br><br>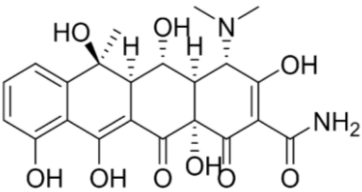 | Molecular formula:<br>C <sub>22</sub> H <sub>24</sub> N <sub>2</sub> O <sub>9</sub><br><br>Monoisotopic mass<br>(Da): 460.1476<br><br>pKa (strongest acidic):<br>3.18<br><br>pKa (strongest basic):<br>8.65<br><br>Partition coefficient<br>(Log P): -4.569<br><br>Intrinsic solubility<br>(mg mL <sup>-1</sup> ): -1.93 (High) | [M+H] <sup>+</sup> ;<br>[M-H] <sup>-</sup> | 461.1555;<br>459.1409                    | 426.1183;<br>201.0546;<br>212.0648;<br>184.0519;<br>145.0648 | 459.1409;<br>374.1245;<br>135.0452;<br>171.0452;<br>65.9985 |        |

| Group/Class - Pharmacologically active Substance                                 | Physicochemical properties                                                          | Monitored ion                              | Theoretical exact mass MS ( <i>m/z</i> ) | Fragment ions ( <i>m/z</i> ) MS <sup>2</sup> |                                     |        |
|----------------------------------------------------------------------------------|-------------------------------------------------------------------------------------|--------------------------------------------|------------------------------------------|----------------------------------------------|-------------------------------------|--------|
|                                                                                  |                                                                                     |                                            |                                          | [M+H] <sup>+</sup>                           | [M-H] <sup>-</sup>                  | Others |
| <i>Tetracycline</i>                                                              | Molecular formula:<br>C <sub>22</sub> H <sub>24</sub> N <sub>2</sub> O <sub>8</sub> | [M+H] <sup>+</sup> ;<br>[M-H] <sup>-</sup> | 445.1605;<br>443.1460                    | 428.1336;<br>410.1229;<br>154.0497;          | 135.0452;<br>161.0244;<br>142.0146; |        |
| CAS registration number:<br>60-54-8                                              | Monoisotopic mass<br>(Da): 444.1527                                                 |                                            |                                          | 445.1605;<br>98.0600                         | 187.0765;<br>125.0720               |        |
| ChemSpider ID:<br>10257122                                                       | pKa (strongest acidic):<br>3.25                                                     |                                            |                                          |                                              |                                     |        |
| PubChem CID:<br>54675776                                                         | pKa (strongest basic):<br>8.96                                                      |                                            |                                          |                                              |                                     |        |
| 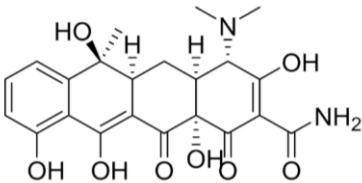 | Partition coefficient<br>(Log P): -3.499                                            |                                            |                                          |                                              |                                     |        |
|                                                                                  | Intrinsic solubility<br>(mg mL <sup>-1</sup> ): -2.329<br>(High)                    |                                            |                                          |                                              |                                     |        |

| Group/Class - Pharmacologically active Substance                                                                                                                                                                                            | Physicochemical properties                                                                                                                                                                                                                                                                                 | Monitored ion      | Theoretical exact mass MS ( <i>m/z</i> ) | Fragment ions ( <i>m/z</i> ) MS <sup>2</sup>                |                    |        |
|---------------------------------------------------------------------------------------------------------------------------------------------------------------------------------------------------------------------------------------------|------------------------------------------------------------------------------------------------------------------------------------------------------------------------------------------------------------------------------------------------------------------------------------------------------------|--------------------|------------------------------------------|-------------------------------------------------------------|--------------------|--------|
|                                                                                                                                                                                                                                             |                                                                                                                                                                                                                                                                                                            |                    |                                          | [M+H] <sup>+</sup>                                          | [M-H] <sup>-</sup> | Others |
| <b>Antimicrobials/Others</b><br><br><i>Bromhexine</i><br><br>CAS registration number: 3572-43-8<br><br>ChemSpider ID: 2348<br><br>PubChem CID: 2442<br><br>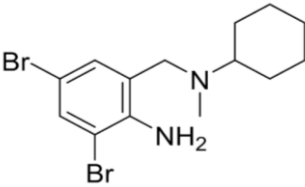 | Molecular formula: C <sub>14</sub> H <sub>20</sub> Br <sub>2</sub> N <sub>2</sub><br><br>Monoisotopic mass (Da): 373.9988<br><br>pKa (strongest acidic): -<br><br>pKa (strongest basic): 9.23<br><br>Partition coefficient (Log P): 4.422<br><br>Intrinsic solubility (mg mL <sup>-1</sup> ): -4.685 (Low) | [M+H] <sup>+</sup> | 375.0066                                 | 375.0066;<br>261.8862;<br>114.1277;<br>104.0495;<br>95.0491 |                    |        |

| Group/Class - Pharmacologically active Substance                                 | Physicochemical properties                                                            | Monitored ion                              | Theoretical exact mass MS ( <i>m/z</i> ) | Fragment ions ( <i>m/z</i> ) MS <sup>2</sup> |                                   |        |
|----------------------------------------------------------------------------------|---------------------------------------------------------------------------------------|--------------------------------------------|------------------------------------------|----------------------------------------------|-----------------------------------|--------|
|                                                                                  |                                                                                       |                                            |                                          | [M+H] <sup>+</sup>                           | [M-H] <sup>-</sup>                | Others |
| <i>Dapsone</i>                                                                   | Molecular formula:<br>C <sub>12</sub> H <sub>12</sub> N <sub>2</sub> O <sub>2</sub> S | [M+H] <sup>+</sup> ;<br>[M-H] <sup>-</sup> | 249.0692<br>247.0547                     | 156.0114;<br>108.0444;<br>65.0386;           | 79.9574;<br>97.0659;<br>107.0377; |        |
| CAS registration number:<br>80-08-0                                              | Monoisotopic mass<br>(Da): 248.0614                                                   |                                            |                                          | 92.0495;<br>80.0495                          | 121.0295;<br>95.0502              |        |
| ChemSpider ID:<br>2849                                                           | pKa (strongest acidic): -                                                             |                                            |                                          |                                              |                                   |        |
| PubChem CID:<br>2955                                                             | pKa (strongest basic):<br>2.39                                                        |                                            |                                          |                                              |                                   |        |
| 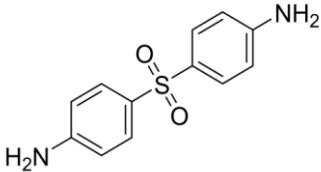 | Partition coefficient<br>(Log P): 1.27                                                |                                            |                                          |                                              |                                   |        |
|                                                                                  | Intrinsic solubility<br>(mg mL <sup>-1</sup> ): -2.91 (High)                          |                                            |                                          |                                              |                                   |        |

| Group/Class - Pharmacologically active Substance                                                                                   | Physicochemical properties                                                                                                                                                                                                                                                                                             | Monitored ion                              | Theoretical exact mass MS ( <i>m/z</i> ) | Fragment ions ( <i>m/z</i> ) MS <sup>2</sup>               |                                                             |        |
|------------------------------------------------------------------------------------------------------------------------------------|------------------------------------------------------------------------------------------------------------------------------------------------------------------------------------------------------------------------------------------------------------------------------------------------------------------------|--------------------------------------------|------------------------------------------|------------------------------------------------------------|-------------------------------------------------------------|--------|
|                                                                                                                                    |                                                                                                                                                                                                                                                                                                                        |                                            |                                          | [M+H] <sup>+</sup>                                         | [M-H] <sup>-</sup>                                          | Others |
| <i>Rifampicin</i><br><br>CAS registration number:<br>13292-46-1<br><br>ChemSpider ID:<br>10468813<br><br>PubChem CID:<br>135900090 | Molecular formula:<br>C <sub>43</sub> H <sub>58</sub> N <sub>4</sub> O <sub>12</sub><br><br>Monoisotopic mass (Da): 822.4046<br><br>pKa (strongest acidic):<br>6.94<br><br>pKa (strongest basic):<br>7.53<br><br>Partition coefficient (Log P): 2.833<br><br>Intrinsic solubility (mg mL <sup>-1</sup> ): -5.484 (Low) | [M+H] <sup>+</sup> ;<br>[M-H] <sup>-</sup> | 823.4124;<br>821.3979                    | 91.0542;<br>95.0855;<br>791.3862;<br>151.0754;<br>105.0699 | 297.0517;<br>270.0408;<br>397.1514;<br>65.9985;<br>298.0595 |        |

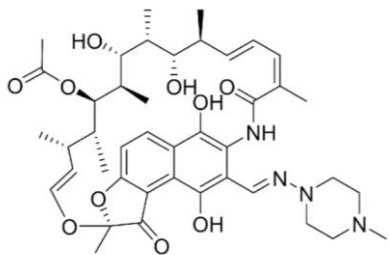

| Group/Class - Pharmacologically active Substance                                                                                                                                                           | Physicochemical properties                                                                                                                                                                                                                                                                             | Monitored ion      | Theoretical exact mass MS ( <i>m/z</i> ) | Fragment ions ( <i>m/z</i> ) MS <sup>2</sup>              |                    |        |
|------------------------------------------------------------------------------------------------------------------------------------------------------------------------------------------------------------|--------------------------------------------------------------------------------------------------------------------------------------------------------------------------------------------------------------------------------------------------------------------------------------------------------|--------------------|------------------------------------------|-----------------------------------------------------------|--------------------|--------|
|                                                                                                                                                                                                            |                                                                                                                                                                                                                                                                                                        |                    |                                          | [M+H] <sup>+</sup>                                        | [M-H] <sup>-</sup> | Others |
| <i>Tiamulin</i><br><br>CAS registration number: 55297-95-5<br><br>ChemSpider ID: 571196<br><br>PubChem CID: 656958<br><br>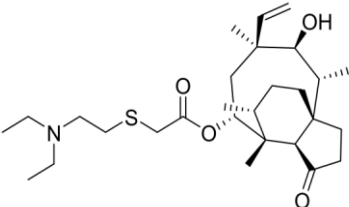 | Molecular formula: C <sub>28</sub> H <sub>47</sub> NO <sub>4</sub> S<br><br>Monoisotopic mass (Da): 493.3220<br><br>pKa (strongest acidic): 14.43<br><br>pKa (strongest basic): 9.51<br><br>Partition coefficient (Log P): 4.501<br><br>Intrinsic solubility (mg mL <sup>-1</sup> ): -4.309 (Moderate) | [M+H] <sup>+</sup> | 494.3299                                 | 192.1053;<br>119.0161;<br>95.0491;<br>91.0542;<br>73.0106 |                    |        |



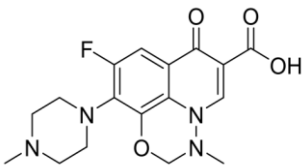

| Group/Class - Pharmacologically active Substance                                  | Physicochemical properties                                             | Monitored ion      | Theoretical exact mass MS ( <i>m/z</i> ) | Fragment ions ( <i>m/z</i> ) MS <sup>2</sup>                 |                    |        |
|-----------------------------------------------------------------------------------|------------------------------------------------------------------------|--------------------|------------------------------------------|--------------------------------------------------------------|--------------------|--------|
|                                                                                   |                                                                        |                    |                                          | [M+H] <sup>+</sup>                                           | [M-H] <sup>-</sup> | Others |
| Antimicrobials Prospect/Macrolides                                                |                                                                        |                    |                                          |                                                              |                    |        |
| Leucomycin/Leucomycin A <sub>5</sub>                                              | Molecular formula:<br>C <sub>39</sub> H <sub>65</sub> NO <sub>14</sub> | [M+H] <sup>+</sup> | 772.4478                                 | 174.1125;<br>109.0648;<br>558.3273;<br>215.1278;<br>132.1019 |                    |        |
| CAS registration number:<br>18361-45-0                                            | Monoisotopic mass (Da): 771.4400                                       |                    |                                          |                                                              |                    |        |
| ChemSpider ID:<br>21250867                                                        | pKa (strongest acidic):<br>12.68                                       |                    |                                          |                                                              |                    |        |
| PubChem CID:<br>5282324                                                           | pKa (strongest basic):<br>8.51                                         |                    |                                          |                                                              |                    |        |
| 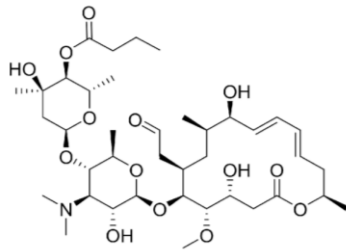 | Partition coefficient (Log P): 2.488                                   |                    |                                          |                                                              |                    |        |
|                                                                                   | Intrinsic solubility (mg mL <sup>-1</sup> ): -2.201 (High)             |                    |                                          |                                                              |                    |        |

| Group/Class - Pharmacologically active Substance                                                                                                                                                                                       | Physicochemical properties                                                                                                                                                                                                                                                                        | Monitored ion      | Theoretical exact mass MS ( <i>m/z</i> ) | Fragment ions ( <i>m/z</i> ) MS <sup>2</sup>              |                    |        |
|----------------------------------------------------------------------------------------------------------------------------------------------------------------------------------------------------------------------------------------|---------------------------------------------------------------------------------------------------------------------------------------------------------------------------------------------------------------------------------------------------------------------------------------------------|--------------------|------------------------------------------|-----------------------------------------------------------|--------------------|--------|
|                                                                                                                                                                                                                                        |                                                                                                                                                                                                                                                                                                   |                    |                                          | [M+H] <sup>+</sup>                                        | [M-H] <sup>-</sup> | Others |
| <i>Josamycin/Leucomycin A<sub>3</sub></i><br><br>CAS registration number: 16846-24-5<br><br>ChemSpider ID: 4445361<br><br>PubChem CID: 5282165<br><br>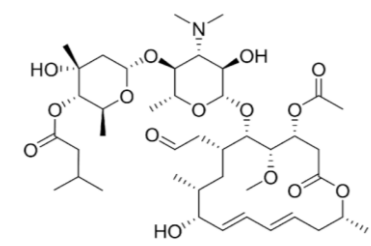 | Molecular formula: C <sub>42</sub> H <sub>69</sub> NO <sub>15</sub><br><br>Monoisotopic mass (Da): 827.4662<br><br>pKa (strongest acidic): 12.71<br><br>pKa (strongest basic): 8.51<br><br>Partition coefficient (Log P): 3.216<br><br>Intrinsic solubility (mg mL <sup>-1</sup> ): -2.608 (High) | [M+H] <sup>+</sup> | 828.4740                                 | 174.1125;<br>109.0648;<br>83.0491;<br>79.0543;<br>81.0699 |                    |        |

| Group/Class - Pharmacologically active Substance                                  | Physicochemical properties                                                          | Monitored ion                                | Theoretical exact mass<br>MS ( <i>m/z</i> ) | Fragment ions ( <i>m/z</i> ) MS <sup>2</sup>              |                    |                                                                       |
|-----------------------------------------------------------------------------------|-------------------------------------------------------------------------------------|----------------------------------------------|---------------------------------------------|-----------------------------------------------------------|--------------------|-----------------------------------------------------------------------|
|                                                                                   |                                                                                     |                                              |                                             | [M+H] <sup>+</sup>                                        | [M-H] <sup>-</sup> | Others                                                                |
| <i>Tildipirosin</i>                                                               | Molecular formula:<br>C <sub>41</sub> H <sub>71</sub> N <sub>3</sub> O <sub>8</sub> | [M+H] <sup>+</sup> ;<br>[M+3H] <sup>3+</sup> | 734.5314;<br>245.5153                       | 561.4262;<br>98.0964;<br>73.0522;<br>70.0651;<br>116.0706 |                    | [M+3H] <sup>3+</sup><br>281.2138;<br>174.1125;<br>98.0964;<br>88.0757 |
| CAS registration number:<br>328898-40-4                                           | Monoisotopic mass<br>(Da): 733.5236                                                 |                                              |                                             |                                                           |                    |                                                                       |
| ChemSpider ID:<br>30790722                                                        | pKa (strongest acidic):<br>12.68                                                    |                                              |                                             |                                                           |                    |                                                                       |
| PubChem CID:<br>24860548                                                          | pKa (strongest basic):<br>10.05                                                     |                                              |                                             |                                                           |                    |                                                                       |
| 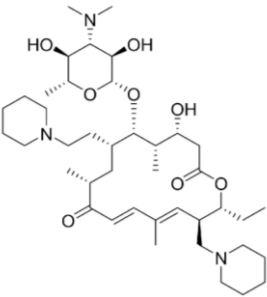 | Partition coefficient<br>(Log P): 4.457                                             |                                              |                                             |                                                           |                    |                                                                       |
|                                                                                   | Intrinsic solubility<br>(mg mL <sup>-1</sup> ): -2.731<br>(High)                    |                                              |                                             |                                                           |                    |                                                                       |

| Group/Class - Pharmacologically active Substance                                                                                                    | Physicochemical properties                                                                                                                                                                                                                                                                                  | Monitored ion                                                                    | Theoretical exact mass MS ( <i>m/z</i> )          | Fragment ions ( <i>m/z</i> ) MS <sup>2</sup>                                      |                    |                                                                                                                                                                          |
|-----------------------------------------------------------------------------------------------------------------------------------------------------|-------------------------------------------------------------------------------------------------------------------------------------------------------------------------------------------------------------------------------------------------------------------------------------------------------------|----------------------------------------------------------------------------------|---------------------------------------------------|-----------------------------------------------------------------------------------|--------------------|--------------------------------------------------------------------------------------------------------------------------------------------------------------------------|
|                                                                                                                                                     |                                                                                                                                                                                                                                                                                                             |                                                                                  |                                                   | [M+H] <sup>+</sup>                                                                | [M-H] <sup>-</sup> | Others                                                                                                                                                                   |
| <p><i>Tulathromycin (Tulathromycin A)</i></p> <p>CAS registration number: 217500-96-4</p> <p>ChemSpider ID: 8008030</p> <p>PubChem CID: 9832301</p> | <p>Molecular formula: C<sub>41</sub>H<sub>79</sub>N<sub>3</sub>O<sub>12</sub></p> <p>Monoisotopic mass (Da): 805.5658</p> <p>pKa (strongest acidic): 12.2</p> <p>pKa (strongest basic): 10.21</p> <p>Partition coefficient (Log P): 2.5</p> <p>Intrinsic solubility (mg mL<sup>-1</sup>): -1.691 (High)</p> | <p>[M+H]<sup>+</sup>;</p> <p>[M+2H]<sup>2+</sup>;</p> <p>[M+3H]<sup>3+</sup></p> | <p>806.5737;</p> <p>403.7905;</p> <p>269.5294</p> | <p>577.4059;</p> <p>72.0808;</p> <p>158.1176;</p> <p>116.1073;</p> <p>98.0964</p> |                    | <p>[M+2H]<sup>2+</sup></p> <p>230.1751;</p> <p>158.1176;</p> <p>116.1070;</p> <p>72.0808</p> <p>[M+3H]<sup>3+</sup></p> <p>158.1176;</p> <p>72.0808;</p> <p>116.0706</p> |

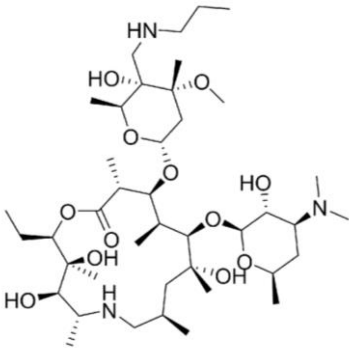

| Group/Class - Pharmacologically active Substance                                                                                                                                                                                                                          | Physicochemical properties                                                                         | Monitored ion                              | Theoretical exact mass MS ( <i>m/z</i> ) | Fragment ions ( <i>m/z</i> ) MS <sup>2</sup> |                                     |        |
|---------------------------------------------------------------------------------------------------------------------------------------------------------------------------------------------------------------------------------------------------------------------------|----------------------------------------------------------------------------------------------------|--------------------------------------------|------------------------------------------|----------------------------------------------|-------------------------------------|--------|
|                                                                                                                                                                                                                                                                           |                                                                                                    |                                            |                                          | [M+H] <sup>+</sup>                           | [M-H] <sup>-</sup>                  | Others |
| <b>Antimicrobials Prospect/ Sulfonamides</b><br><i>Phthalylsulfathiazole</i><br><br>CAS registration number:<br>85-73-4<br><br>ChemSpider ID:<br>4641<br><br>PubChem CID:<br>4806<br><br>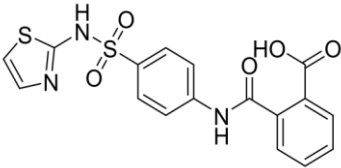 | Molecular formula:<br>C <sub>17</sub> H <sub>13</sub> N <sub>3</sub> O <sub>5</sub> S <sub>2</sub> | [M+H] <sup>+</sup> ;<br>[M-H] <sup>-</sup> | 404.0369;<br>402.0224                    | 149.0233;<br>256.0209;<br>156.0113;          | 358.0315;<br>254.0066;<br>196.0767; |        |
|                                                                                                                                                                                                                                                                           | Monoisotopic mass (Da): 403.0291                                                                   |                                            |                                          | 108.0443;<br>92.0493                         | 190.0447;<br>260.0376               |        |
|                                                                                                                                                                                                                                                                           | pKa (strongest acidic):<br>4.38                                                                    |                                            |                                          |                                              |                                     |        |
|                                                                                                                                                                                                                                                                           | pKa (strongest basic):<br>0.59                                                                     |                                            |                                          |                                              |                                     |        |
|                                                                                                                                                                                                                                                                           | Partition coefficient (Log P): 2.553                                                               |                                            |                                          |                                              |                                     |        |
|                                                                                                                                                                                                                                                                           | Intrinsic solubility (mg mL <sup>-1</sup> ): -4.801 (Low)                                          |                                            |                                          |                                              |                                     |        |
|                                                                                                                                                                                                                                                                           |                                                                                                    |                                            |                                          |                                              |                                     |        |

| Group/Class - Pharmacologically active Substance                                 | Physicochemical properties                                                           | Monitored ion                              | Theoretical exact mass MS ( <i>m/z</i> ) | Fragment ions ( <i>m/z</i> ) MS <sup>2</sup> |                       |        |
|----------------------------------------------------------------------------------|--------------------------------------------------------------------------------------|--------------------------------------------|------------------------------------------|----------------------------------------------|-----------------------|--------|
|                                                                                  |                                                                                      |                                            |                                          | [M+H] <sup>+</sup>                           | [M-H] <sup>-</sup>    | Others |
| <i>Sulfacetamide/N-Sulfanilylacetamide</i>                                       | Molecular formula:<br>C <sub>8</sub> H <sub>10</sub> N <sub>2</sub> O <sub>3</sub> S | [M+H] <sup>+</sup> ;<br>[M-H] <sup>-</sup> | 215.0485;<br>213.0339                    | 215.1252;<br>156.0112;<br>108.0443;          | 195.0223;<br>171.0223 |        |
| CAS registration number:<br>144-80-9                                             | Monoisotopic mass (Da): 214.0407                                                     |                                            |                                          | 92.0493;<br>68.0495                          |                       |        |
| ChemSpider ID:<br>5129                                                           | pKa (strongest acidic):<br>5.6                                                       |                                            |                                          |                                              |                       |        |
| PubChem CID:<br>5320                                                             | pKa (strongest basic):<br>2.14                                                       |                                            |                                          |                                              |                       |        |
| 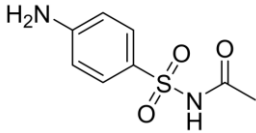 | Partition coefficient (Log P): -0.261                                                |                                            |                                          |                                              |                       |        |
|                                                                                  | Intrinsic solubility (mg mL <sup>-1</sup> ): -1.51 (High)                            |                                            |                                          |                                              |                       |        |

| Group/Class - Pharmacologically active Substance                                 | Physicochemical properties                                                            | Monitored ion                              | Theoretical exact mass MS ( <i>m/z</i> ) | Fragment ions ( <i>m/z</i> ) MS <sup>2</sup>                |                                                            |        |
|----------------------------------------------------------------------------------|---------------------------------------------------------------------------------------|--------------------------------------------|------------------------------------------|-------------------------------------------------------------|------------------------------------------------------------|--------|
|                                                                                  |                                                                                       |                                            |                                          | [M+H] <sup>+</sup>                                          | [M-H] <sup>-</sup>                                         | Others |
| <i>Sulfamethoxypyridazine</i>                                                    | Molecular formula:<br>C <sub>11</sub> H <sub>12</sub> N <sub>4</sub> O <sub>3</sub> S | [M+H] <sup>+</sup> ;<br>[M-H] <sup>-</sup> | 281.0703;<br>279.0557                    | 156.0113;<br>126.0662;<br>108.0443;<br>92.0495;<br>126.0662 | 156.0123;<br>279.0551;<br>79.9574;<br>92.0505;<br>264.0322 |        |
| CAS registration number:<br>80-35-3                                              | Monoisotopic mass<br>(Da): 280.0625                                                   |                                            |                                          |                                                             |                                                            |        |
| ChemSpider ID:<br>5139                                                           | pKa (strongest acidic):<br>6.84                                                       |                                            |                                          |                                                             |                                                            |        |
| PubChem CID:<br>5330                                                             | pKa (strongest basic):<br>2.02                                                        |                                            |                                          |                                                             |                                                            |        |
| 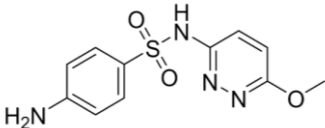 | Partition coefficient<br>(Log P): 0.466                                               |                                            |                                          |                                                             |                                                            |        |
|                                                                                  | Intrinsic solubility<br>(mg mL <sup>-1</sup> ):<br>-2.908 (High)                      |                                            |                                          |                                                             |                                                            |        |



| Group/Class - Pharmacologically active Substance                                 | Physicochemical properties                                           | Monitored ion                              | Theoretical exact mass MS ( <i>m/z</i> ) | Fragment ions ( <i>m/z</i> ) MS <sup>2</sup> |                                     |        |
|----------------------------------------------------------------------------------|----------------------------------------------------------------------|--------------------------------------------|------------------------------------------|----------------------------------------------|-------------------------------------|--------|
|                                                                                  |                                                                      |                                            |                                          | [M+H] <sup>+</sup>                           | [M-H] <sup>-</sup>                  | Others |
| Antimicrobials Prospect/Others                                                   |                                                                      |                                            |                                          |                                              |                                     |        |
| Diminazene                                                                       | Molecular formula:<br>C <sub>14</sub> H <sub>15</sub> N <sub>7</sub> | [M+H] <sup>+</sup> ;<br>[M-H] <sup>-</sup> | 282.1462;<br>280.1316                    | 119.0604;<br>237.1135                        | 252.1244;<br>235.0978;<br>193.0760; |        |
| CAS registration number:<br>536-71-0                                             | Monoisotopic mass (Da): 281.1384                                     |                                            |                                          |                                              | 210.1026;<br>218.0713               |        |
| ChemSpider ID:<br>2264                                                           | pKa (strongest acidic): -                                            |                                            |                                          |                                              |                                     |        |
| PubChem CID:<br>2354                                                             | pKa (strongest basic):<br>12.07                                      |                                            |                                          |                                              |                                     |        |
| 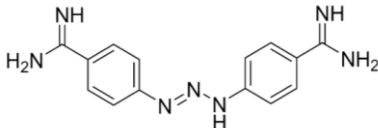 | Partition coefficient (Log P): 1.763                                 |                                            |                                          |                                              |                                     |        |
|                                                                                  | Intrinsic solubility (mg mL <sup>-1</sup> ): -4.181 (Moderate)       |                                            |                                          |                                              |                                     |        |

| Group/Class - Pharmacologically active Substance                                 | Physicochemical properties                                           | Monitored ion                               | Theoretical exact mass MS ( <i>m/z</i> ) | Fragment ions ( <i>m/z</i> ) MS <sup>2</sup>  |                    |                                                                      |
|----------------------------------------------------------------------------------|----------------------------------------------------------------------|---------------------------------------------|------------------------------------------|-----------------------------------------------|--------------------|----------------------------------------------------------------------|
|                                                                                  |                                                                      |                                             |                                          | [M+H] <sup>+</sup>                            | [M-H] <sup>-</sup> | Others                                                               |
| <i>Fosfomycin</i>                                                                | Molecular formula:<br>C <sub>3</sub> H <sub>7</sub> O <sub>4</sub> P | [M+H] <sup>+</sup> ;<br>[M+Ca] <sup>+</sup> | 139.0155;<br>178.9781                    | 98.9842;<br>121.0049;<br>82.9893;<br>109.0049 |                    | [M+Ca] <sup>+</sup><br>98.9842;<br>121.0049;<br>82.9893;<br>109.0049 |
| CAS registration number:<br>23155-02-4                                           | Monoisotopic mass<br>(Da): 138.0077                                  |                                             |                                          |                                               |                    |                                                                      |
| ChemSpider ID:<br>394204                                                         | pKa (strongest acidic):<br>1.25                                      |                                             |                                          |                                               |                    |                                                                      |
| PubChem CID:<br>446987                                                           | pKa (strongest basic): -                                             |                                             |                                          |                                               |                    |                                                                      |
| 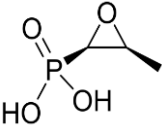 | Partition coefficient<br>(Log P): -0.738                             |                                             |                                          |                                               |                    |                                                                      |
|                                                                                  | Intrinsic solubility<br>(mg mL <sup>-1</sup> ): 1.629 (High)         |                                             |                                          |                                               |                    |                                                                      |

| Group/Class - Pharmacologically active Substance                                                                                                                                                              | Physicochemical properties                                                                                                                                                                                                                                                                                                               | Monitored ion      | Theoretical exact mass MS ( <i>m/z</i> ) | Fragment ions ( <i>m/z</i> ) MS <sup>2</sup>               |                    |        |
|---------------------------------------------------------------------------------------------------------------------------------------------------------------------------------------------------------------|------------------------------------------------------------------------------------------------------------------------------------------------------------------------------------------------------------------------------------------------------------------------------------------------------------------------------------------|--------------------|------------------------------------------|------------------------------------------------------------|--------------------|--------|
|                                                                                                                                                                                                               |                                                                                                                                                                                                                                                                                                                                          |                    |                                          | [M+H] <sup>+</sup>                                         | [M-H] <sup>-</sup> | Others |
| <i>Isoniazid</i><br><br>CAS registration number:<br>54-85-3<br><br>ChemSpider ID:<br>3635<br><br>PubChem CID:<br>3767<br><br>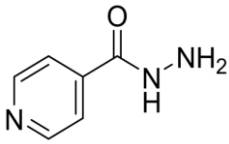 | Molecular formula:<br>C <sub>6</sub> H <sub>7</sub> N <sub>3</sub> O<br><br>Monoisotopic mass<br>(Da): 137.0584<br><br>pK <sub>a</sub> (strongest acidic):<br>13.61<br><br>pK <sub>a</sub> (strongest basic):<br>3.26<br><br>Partition coefficient<br>(Log P): -0.69<br><br>Intrinsic solubility<br>(mg mL <sup>-1</sup> ): -0.41 (High) | [M+H] <sup>+</sup> | 138.0662                                 | 121.0397;<br>109.0524;<br>138.0662;<br>79.0417;<br>78.0338 |                    |        |

| Group/Class - Pharmacologically active Substance                                                                                                                                                                | Physicochemical properties                                                                                                                                                                                                                                                                               | Monitored ion      | Theoretical exact mass MS ( <i>m/z</i> ) | Fragment ions ( <i>m/z</i> ) MS <sup>2</sup>                |                    |        |
|-----------------------------------------------------------------------------------------------------------------------------------------------------------------------------------------------------------------|----------------------------------------------------------------------------------------------------------------------------------------------------------------------------------------------------------------------------------------------------------------------------------------------------------|--------------------|------------------------------------------|-------------------------------------------------------------|--------------------|--------|
|                                                                                                                                                                                                                 |                                                                                                                                                                                                                                                                                                          |                    |                                          | [M+H] <sup>+</sup>                                          | [M-H] <sup>-</sup> | Others |
| <p><i>Novobiocin</i></p> <p>CAS registration number: 303-81-1</p> <p>ChemSpider ID: 10226117</p> <p>PubChem CID: 54675769</p> 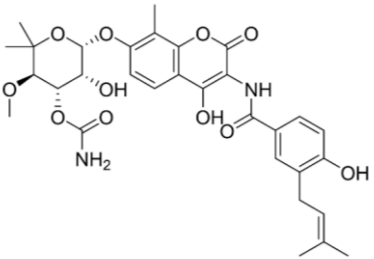 | <p>Molecular formula: C<sub>31</sub>H<sub>36</sub>N<sub>2</sub>O<sub>11</sub></p> <p>Monoisotopic mass (Da): 612.2314</p> <p>pKa (strongest acidic): 5.51</p> <p>pKa (strongest basic): -</p> <p>Partition coefficient (Log P): 3.409</p> <p>Intrinsic solubility (mg mL<sup>-1</sup>): -5.919 (Low)</p> | [M+H] <sup>+</sup> | 613.2392                                 | 189.0910;<br>218.1023;<br>77.0386;<br>151.0390;<br>133.0284 |                    |        |

| Group/Class - Pharmacologically active Substance                                                                                                                                                                         | Physicochemical properties                                                                                                                                                                                                                                                                                             | Monitored ion                              | Theoretical exact mass MS ( <i>m/z</i> ) | Fragment ions ( <i>m/z</i> ) MS <sup>2</sup>              |                                                             |        |
|--------------------------------------------------------------------------------------------------------------------------------------------------------------------------------------------------------------------------|------------------------------------------------------------------------------------------------------------------------------------------------------------------------------------------------------------------------------------------------------------------------------------------------------------------------|--------------------------------------------|------------------------------------------|-----------------------------------------------------------|-------------------------------------------------------------|--------|
|                                                                                                                                                                                                                          |                                                                                                                                                                                                                                                                                                                        |                                            |                                          | [M+H] <sup>+</sup>                                        | [M-H] <sup>-</sup>                                          | Others |
| <i>Rifaximin</i><br><br>CAS registration number:<br>80621-81-4<br><br>ChemSpider ID:<br>10482302<br><br>PubChem CID:<br>6436173<br><br>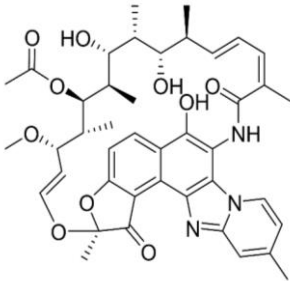 | Molecular formula:<br>C <sub>43</sub> H <sub>51</sub> N <sub>3</sub> O <sub>11</sub><br><br>Monoisotopic mass (Da): 785.3518<br><br>pKa (strongest acidic):<br>6.72<br><br>pKa (strongest basic):<br>5.89<br><br>Partition coefficient (Log P): 4.599<br><br>Intrinsic solubility (mg mL <sup>-1</sup> ): -7.704 (Low) | [M+H] <sup>+</sup> ;<br>[M-H] <sup>-</sup> | 786.3596;<br>784.3451                    | 91.0542;<br>95.0855;<br>151.0754;<br>754.3334;<br>65.0386 | 784.3451;<br>360.0987;<br>482.1718;<br>156.0567;<br>65.9985 |        |

| Group/Class - Pharmacologically active Substance                                  | Physicochemical properties                                                         | Monitored ion      | Theoretical exact mass MS ( <i>m/z</i> ) | Fragment ions ( <i>m/z</i> ) MS <sup>2</sup>                 |                                                              |        |
|-----------------------------------------------------------------------------------|------------------------------------------------------------------------------------|--------------------|------------------------------------------|--------------------------------------------------------------|--------------------------------------------------------------|--------|
|                                                                                   |                                                                                    |                    |                                          | [M+H] <sup>+</sup>                                           | [M-H] <sup>-</sup>                                           | Others |
| <b>Antibiotic Growth Promoters</b>                                                |                                                                                    |                    |                                          |                                                              |                                                              |        |
| <i>Avilamycin (Dichloroisoeverninic acid)</i>                                     | Molecular formula:<br>C <sub>9</sub> H <sub>8</sub> Cl <sub>2</sub> O <sub>4</sub> | [M+H] <sup>-</sup> | 248.9727                                 |                                                              | 204.9818;<br>189.9583;<br>174.9712;<br>169.0051;<br>233.9481 |        |
| CAS registration number:<br>4101-80-8                                             | Monoisotopic mass<br>(Da): 249.9794                                                |                    |                                          |                                                              |                                                              |        |
| ChemSpider ID:<br>10311534                                                        | pKa (strongest acidic):<br>3.4                                                     |                    |                                          |                                                              |                                                              |        |
| PubChem CID:<br>21724963                                                          | pKa (strongest basic): -                                                           |                    |                                          |                                                              |                                                              |        |
| 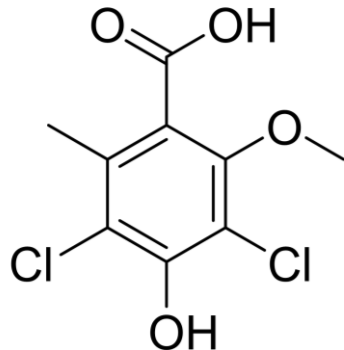 | Partition coefficient<br>(Log P): 2.891                                            |                    |                                          |                                                              |                                                              |        |
|                                                                                   | Intrinsic solubility<br>(mg mL <sup>-1</sup> ): -2.95 (High)                       |                    |                                          |                                                              |                                                              |        |
| <i>Halquinol/Chlorhydroxyquinoline (7-Chloro-8-quinolinol)</i>                    | Molecular formula:<br>C <sub>9</sub> H <sub>6</sub> ClNO                           | [M+H] <sup>+</sup> | 180.0211                                 | 145.0522;<br>162.0105;<br>117.0573;<br>127.0417;<br>116.0495 |                                                              |        |
| CAS registration number:<br>876-86-8                                              | Monoisotopic mass<br>(Da): 179.0132                                                |                    |                                          |                                                              |                                                              |        |

| Group/Class - Pharmacologically active Substance                                 | Physicochemical properties                                             | Monitored ion      | Theoretical exact mass MS ( <i>m/z</i> ) | Fragment ions ( <i>m/z</i> ) MS <sup>2</sup> |                    |        |
|----------------------------------------------------------------------------------|------------------------------------------------------------------------|--------------------|------------------------------------------|----------------------------------------------|--------------------|--------|
|                                                                                  |                                                                        |                    |                                          | [M+H] <sup>+</sup>                           | [M-H] <sup>-</sup> | Others |
| ChemSpider ID:<br>23089                                                          | pKa (strongest acidic):<br>8.33                                        |                    |                                          |                                              |                    |        |
| PubChem CID:<br>24691                                                            | pKa (strongest basic):<br>4.16                                         |                    |                                          |                                              |                    |        |
| 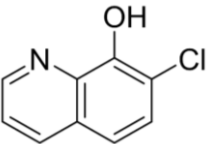 | Partition coefficient<br>(Log P): 2.431                                |                    |                                          |                                              |                    |        |
|                                                                                  | Intrinsic solubility<br>(mg mL <sup>-1</sup> ): -2.367<br>(High)       |                    |                                          |                                              |                    |        |
| <i>Halquinol/Chlorhydroxyquinoline (5,7-Dichloro-8-quinolinol/Chloroxine)</i>    | Molecular formula:<br>C <sub>9</sub> H <sub>5</sub> Cl <sub>2</sub> NO | [M+H] <sup>+</sup> | 213.9821                                 | 179.0132;<br>164.9976;<br>150.0105;          |                    |        |
| CAS registration number:<br>773-76-2                                             | Monoisotopic mass<br>(Da): 212.9743                                    |                    |                                          | 122.9996;<br>151.0183                        |                    |        |

| Group/Class - Pharmacologically active Substance                                 | Physicochemical properties                                       | Monitored ion      | Theoretical exact mass MS ( <i>m/z</i> ) | Fragment ions ( <i>m/z</i> ) MS <sup>2</sup> |                    |        |
|----------------------------------------------------------------------------------|------------------------------------------------------------------|--------------------|------------------------------------------|----------------------------------------------|--------------------|--------|
|                                                                                  |                                                                  |                    |                                          | [M+H] <sup>+</sup>                           | [M-H] <sup>-</sup> | Others |
| ChemSpider ID:<br>2621                                                           | pKa (strongest acidic):<br>7.85                                  |                    |                                          |                                              |                    |        |
| PubChem CID:<br>2722                                                             | pKa (strongest basic):<br>3.4                                    |                    |                                          |                                              |                    |        |
| 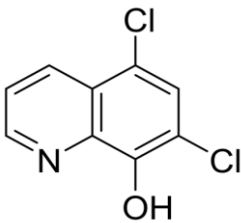 | Partition coefficient<br>(Log P): 3.035                          |                    |                                          |                                              |                    |        |
|                                                                                  | Intrinsic solubility<br>(mg mL <sup>-1</sup> ): -3.139<br>(High) |                    |                                          |                                              |                    |        |
| <i>Halquinol/Chlorhydroxyquinoline (5-Chloro-8-hydroxyquinoline)</i>             | Molecular formula:<br>C <sub>9</sub> H <sub>6</sub> ClNO         | [M+H] <sup>+</sup> | 180.0211                                 | 145.0522;<br>117.0573;<br>162.0105;          |                    |        |
| CAS registration number:<br>130-16-5                                             | Monoisotopic mass<br>(Da): 179.0132                              |                    |                                          | 116.0495;<br>127.0417                        |                    |        |
| ChemSpider ID:                                                                   |                                                                  |                    |                                          |                                              |                    |        |



| Group/Class - Pharmacologically active Substance                                 | Physicochemical properties                                                       | Monitored ion        | Theoretical exact mass MS ( <i>m/z</i> ) | Fragment ions ( <i>m/z</i> ) MS <sup>2</sup> |                    |                     |
|----------------------------------------------------------------------------------|----------------------------------------------------------------------------------|----------------------|------------------------------------------|----------------------------------------------|--------------------|---------------------|
|                                                                                  |                                                                                  |                      |                                          | [M+H] <sup>+</sup>                           | [M-H] <sup>-</sup> | Others              |
| 2715                                                                             | pKa (strongest acidic): 8.77                                                     |                      |                                          |                                              |                    |                     |
| PubChem CID: 2817                                                                | pKa (strongest basic): 4.01                                                      |                      |                                          |                                              |                    |                     |
| 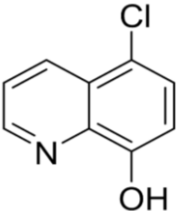 | Partition coefficient (Log P): 2.431                                             |                      |                                          |                                              |                    |                     |
|                                                                                  | Intrinsic solubility (mg mL <sup>-1</sup> ): -2.367 (High)                       |                      |                                          |                                              |                    |                     |
| <i>Virginiamycin (Virginiamycin M<sub>1</sub>)</i>                               | Molecular formula: C <sub>28</sub> H <sub>35</sub> N <sub>3</sub> O <sub>7</sub> | [M+H] <sup>+</sup> ; | 526.2548;                                | 109.1016;                                    | 245.0557;          | [M+Na] <sup>+</sup> |
| CAS registration number: 21411-53-0                                              |                                                                                  | [M-H] <sup>-</sup> ; | 524.2402;                                | 355.1281;                                    | 219.0764;          | 287.0638;           |
|                                                                                  |                                                                                  | [M+Na] <sup>+</sup>  | 548.2367                                 | 508.2439;                                    | 420.2180;          | 243.0737;           |
|                                                                                  | Monoisotopic mass (Da): 525.2470                                                 |                      |                                          | 337.1185                                     | 263.0662;          | 109.1012;           |
|                                                                                  |                                                                                  |                      |                                          |                                              | 206.1185           | 284.1618;           |
|                                                                                  |                                                                                  |                      |                                          |                                              |                    | 114.0550            |
| ChemSpider ID: 10222381                                                          |                                                                                  |                      |                                          |                                              |                    |                     |

| Group/Class - Pharmacologically active Substance                                                                            | Physicochemical properties                                                                                                                                                                               | Monitored ion                                                                    | Theoretical exact mass MS ( <i>m/z</i> ) | Fragment ions ( <i>m/z</i> ) MS <sup>2</sup> |                    |                                                                     |
|-----------------------------------------------------------------------------------------------------------------------------|----------------------------------------------------------------------------------------------------------------------------------------------------------------------------------------------------------|----------------------------------------------------------------------------------|------------------------------------------|----------------------------------------------|--------------------|---------------------------------------------------------------------|
|                                                                                                                             |                                                                                                                                                                                                          |                                                                                  |                                          | [M+H] <sup>+</sup>                           | [M-H] <sup>-</sup> | Others                                                              |
| <div>PubChem CID: 5459319</div> <div>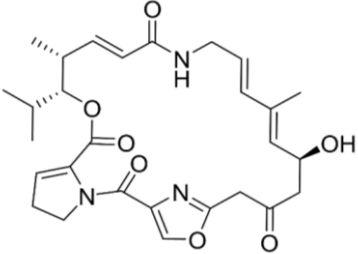</div> | <div>pKa (strongest acidic): 13.17</div> <div>pKa (strongest basic): -0.62</div> <div>Partition coefficient (Log P): 2.376</div> <div>Intrinsic solubility (mg mL<sup>-1</sup>): -4.097 (Moderate)</div> |                                                                                  |                                          |                                              |                    |                                                                     |
| Anticoccidials                                                                                                              |                                                                                                                                                                                                          |                                                                                  |                                          |                                              |                    |                                                                     |
| <i>Amprolium</i>                                                                                                            | Molecular formula: C <sub>14</sub> H <sub>19</sub> N <sub>4</sub>                                                                                                                                        | [M] <sup>+</sup> ;<br>[M+Na] <sup>+</sup> ;<br>[M+NH <sub>4</sub> ] <sup>+</sup> | 243.1604;<br>266.1502;<br>261.1948       |                                              |                    | [M] <sup>+</sup><br>150.1026;<br>122.0713;<br>94.0651;<br>174.1026; |
| CAS registration number: 121-25-5                                                                                           | Monoisotopic mass (Da): 243.1604                                                                                                                                                                         |                                                                                  |                                          |                                              |                    |                                                                     |

| Group/Class - Pharmacologically active Substance                                 | Physicochemical properties                                                                                                                            | Monitored ion                               | Theoretical exact mass MS ( <i>m/z</i> ) | Fragment ions ( <i>m/z</i> ) MS <sup>2</sup> |                    |                                                                                                  |
|----------------------------------------------------------------------------------|-------------------------------------------------------------------------------------------------------------------------------------------------------|---------------------------------------------|------------------------------------------|----------------------------------------------|--------------------|--------------------------------------------------------------------------------------------------|
|                                                                                  |                                                                                                                                                       |                                             |                                          | [M+H] <sup>+</sup>                           | [M-H] <sup>-</sup> | Others                                                                                           |
| ChemSpider ID:<br>66070                                                          | pKa (strongest acidic): -                                                                                                                             |                                             |                                          |                                              |                    | 108.0556                                                                                         |
| PubChem CID:<br>73341                                                            | pKa (strongest basic):<br>5.33                                                                                                                        |                                             |                                          |                                              |                    | [M+Na] <sup>+</sup><br>150.1026;<br>122.0713;<br>94.0651;<br>174.1026;<br>108.0556               |
| 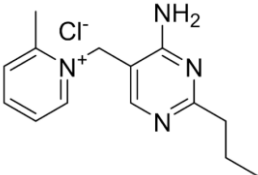 | Partition coefficient (Log P): -2.308                                                                                                                 |                                             |                                          |                                              |                    | [M+NH <sub>4</sub> ] <sup>+</sup><br>150.1026;<br>122.0713;<br>94.0651;<br>174.1026;<br>108.0556 |
|                                                                                  | Intrinsic solubility (mg mL <sup>-1</sup> ): The molecule cannot be neutralized and the calculation is not defined for molecules with non-zero charge |                                             |                                          |                                              |                    |                                                                                                  |
| <i>Clopidol</i>                                                                  | Molecular formula:<br>C <sub>7</sub> H <sub>7</sub> Cl <sub>2</sub> NO                                                                                | [M+H] <sup>+</sup> ;<br>[M+Na] <sup>+</sup> | 191.9978;<br>213.9797                    | 101.0153;<br>86.9996;<br>65.0386;            |                    | [M+Na] <sup>+</sup><br>84.9606;<br>170.9613;                                                     |
| CAS registration number:<br>2971-90-6                                            | Monoisotopic mass (Da): 190.9899                                                                                                                      |                                             |                                          | 72.9840;<br>128.0262                         |                    | 120.9815;<br>101.0153;                                                                           |
| ChemSpider ID:                                                                   |                                                                                                                                                       |                                             |                                          |                                              |                    | 86.9996                                                                                          |

| Group/Class - Pharmacologically active Substance                                                                        | Physicochemical properties                                                                                                                                                                               | Monitored ion                               | Theoretical exact mass MS ( <i>m/z</i> ) | Fragment ions ( <i>m/z</i> ) MS <sup>2</sup>               |                    |                                             |
|-------------------------------------------------------------------------------------------------------------------------|----------------------------------------------------------------------------------------------------------------------------------------------------------------------------------------------------------|---------------------------------------------|------------------------------------------|------------------------------------------------------------|--------------------|---------------------------------------------|
|                                                                                                                         |                                                                                                                                                                                                          |                                             |                                          | [M+H] <sup>+</sup>                                         | [M-H] <sup>-</sup> | Others                                      |
| 17084<br><br>PubChem CID: 18087<br><br>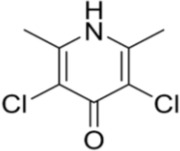 | No ionizable atoms found.<br><br>pKa (strongest acidic): -<br><br>pKa (strongest basic): -<br><br>Partition coefficient (Log P): 1.144<br><br>Intrinsic solubility (mg mL <sup>-1</sup> ): -2.335 (High) |                                             |                                          |                                                            |                    |                                             |
| <i>Diaveridine</i><br><br>CAS registration number: 5355-16-8<br><br>ChemSpider ID:                                      | Molecular formula: C <sub>13</sub> H <sub>16</sub> N <sub>4</sub> O <sub>2</sub><br><br>Monoisotopic mass (Da): 260.1268                                                                                 | [M+H] <sup>+</sup> ;<br>[M+Na] <sup>+</sup> | 261.1346;<br>283.1166                    | 245.1033;<br>123.0665;<br>95.0491;<br>81.0447;<br>245.1033 |                    | [M+Na] <sup>+</sup><br>74.0964;<br>152.1182 |

| Group/Class - Pharmacologically active Substance                                 | Physicochemical properties                                            | Monitored ion                                                       | Theoretical exact mass MS ( <i>m/z</i> ) | Fragment ions ( <i>m/z</i> ) MS <sup>2</sup> |                                    |                                               |
|----------------------------------------------------------------------------------|-----------------------------------------------------------------------|---------------------------------------------------------------------|------------------------------------------|----------------------------------------------|------------------------------------|-----------------------------------------------|
|                                                                                  |                                                                       |                                                                     |                                          | [M+H] <sup>+</sup>                           | [M-H] <sup>-</sup>                 | Others                                        |
| 20162                                                                            | pKa (strongest acidic): -                                             |                                                                     |                                          |                                              |                                    |                                               |
| PubChem CID:<br>21453                                                            | pKa (strongest basic):<br>7.16                                        |                                                                     |                                          |                                              |                                    |                                               |
| 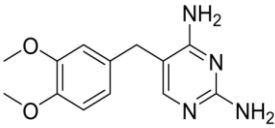 | Partition coefficient<br>(Log P): 1.442                               |                                                                     |                                          |                                              |                                    |                                               |
|                                                                                  | Intrinsic solubility<br>(mg mL <sup>-1</sup> ): -2.803<br>(High)      |                                                                     |                                          |                                              |                                    |                                               |
|                                                                                  |                                                                       |                                                                     |                                          |                                              |                                    |                                               |
| <i>Decoquinatone</i>                                                             | Molecular formula:<br>C <sub>24</sub> H <sub>35</sub> NO <sub>5</sub> | [M+H] <sup>+</sup> ;<br>[M-H] <sup>-</sup> ;<br>[M+Na] <sup>+</sup> | 418.2588;<br>416.2443;<br>440.2407       | 390.2275;<br>222.0397;<br>148.0393;          | 118.0298;<br>275.0799;<br>65.9985; | [M+Na] <sup>+</sup><br>321.1571;<br>236.0596; |
| CAS registration number:<br>18507-89-6                                           | Monoisotopic mass<br>(Da): 417.2510                                   |                                                                     |                                          | 121.0284;<br>250.0710                        | 218.0095;<br>246.0408              | 130.1590;<br>167.9927;<br>261.1335            |
| ChemSpider ID:                                                                   |                                                                       |                                                                     |                                          |                                              |                                    |                                               |

| Group/Class - Pharmacologically active Substance                                                                           | Physicochemical properties                                                                                                                                                            | Monitored ion      | Theoretical exact mass MS ( <i>m/z</i> ) | Fragment ions ( <i>m/z</i> ) MS <sup>2</sup> |                                                              |        |
|----------------------------------------------------------------------------------------------------------------------------|---------------------------------------------------------------------------------------------------------------------------------------------------------------------------------------|--------------------|------------------------------------------|----------------------------------------------|--------------------------------------------------------------|--------|
|                                                                                                                            |                                                                                                                                                                                       |                    |                                          | [M+H] <sup>+</sup>                           | [M-H] <sup>-</sup>                                           | Others |
| 27081<br><br>PubChem CID:<br>29112<br><br>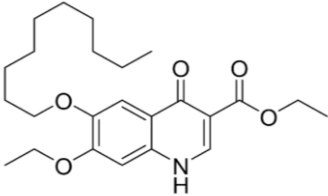 | pKa (strongest acidic):<br>5.82<br><br>pKa (strongest basic): -<br><br>Partition coefficient<br>(Log P): 6.164<br><br>Intrinsic solubility<br>(mg mL <sup>-1</sup> ): -7.341<br>(Low) |                    |                                          |                                              |                                                              |        |
| <i>Diclazuril</i><br><br>CAS registration number:<br>101831-37-2<br><br>ChemSpider ID:                                     | Molecular formula:<br>C <sub>17</sub> H <sub>9</sub> Cl <sub>3</sub> N <sub>4</sub> O <sub>2</sub><br><br>Monoisotopic mass<br>(Da): 405.9786                                         | [M-H] <sup>-</sup> | 404.9718                                 |                                              | 337.9711;<br>298.9783;<br>186.9943;<br>404.9718;<br>235.0070 |        |

| Group/Class - Pharmacologically active Substance                                                                           | Physicochemical properties                                                                                                                                              | Monitored ion                                                       | Theoretical exact mass MS ( <i>m/z</i> ) | Fragment ions ( <i>m/z</i> ) MS <sup>2</sup>    |                                                 |                                                                                     |
|----------------------------------------------------------------------------------------------------------------------------|-------------------------------------------------------------------------------------------------------------------------------------------------------------------------|---------------------------------------------------------------------|------------------------------------------|-------------------------------------------------|-------------------------------------------------|-------------------------------------------------------------------------------------|
|                                                                                                                            |                                                                                                                                                                         |                                                                     |                                          | [M+H] <sup>+</sup>                              | [M-H] <sup>-</sup>                              | Others                                                                              |
| 401855<br><br>PubChem CID: 456389<br><br>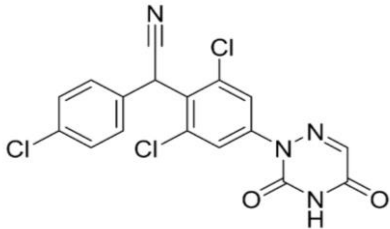 | pKa (strongest acidic): 6.5<br><br>pKa (strongest basic): -<br><br>Partition coefficient (Log P): 4.234<br><br>Intrinsic solubility (mg mL <sup>-1</sup> ): 5.448 (Low) |                                                                     |                                          |                                                 |                                                 |                                                                                     |
| <i>Ethopabate</i><br><br>CAS registration number: 59-06-3<br><br>ChemSpider ID:                                            | Molecular formula: C <sub>12</sub> H <sub>15</sub> NO <sub>4</sub><br><br>Monoisotopic mass (Da): 237.0996                                                              | [M+H] <sup>+</sup> ;<br>[M-H] <sup>-</sup> ;<br>[M+Na] <sup>+</sup> | 238.1074;<br>236.0928;<br>260.0893       | 238.1074;<br>136.0393;<br>164.0706;<br>206.0812 | 208.0604;<br>206.0448;<br>192.0291;<br>207.0526 | [M+Na] <sup>+</sup><br>147.1168;<br>101.0597;<br>182.0448;<br>168.0655;<br>196.0968 |

| Group/Class - Pharmacologically active Substance                                 | Physicochemical properties                                        | Monitored ion                                              | Theoretical exact mass MS ( <i>m/z</i> ) | Fragment ions ( <i>m/z</i> ) MS <sup>2</sup> |                                    |                                                 |
|----------------------------------------------------------------------------------|-------------------------------------------------------------------|------------------------------------------------------------|------------------------------------------|----------------------------------------------|------------------------------------|-------------------------------------------------|
|                                                                                  |                                                                   |                                                            |                                          | [M+H] <sup>+</sup>                           | [M-H] <sup>-</sup>                 | Others                                          |
| 5812                                                                             | pKa (strongest acidic): 13.31                                     |                                                            |                                          |                                              |                                    |                                                 |
| PubChem CID: 6034                                                                | pKa (strongest basic): -                                          |                                                            |                                          |                                              |                                    |                                                 |
| 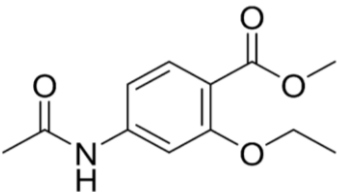 | Partition coefficient (Log P): 1.414                              |                                                            |                                          |                                              |                                    |                                                 |
|                                                                                  | Intrinsic solubility (mg mL <sup>-1</sup> ): -2.243 (High)        |                                                            |                                          |                                              |                                    |                                                 |
| <i>Lasalocid (Lasalocid A)</i>                                                   | Molecular formula: C <sub>34</sub> H <sub>54</sub> O <sub>8</sub> | [M+H] <sup>+</sup> ;<br>[M-H] <sup>-</sup> ;               | 591.3892;<br>589.3746;                   | 237.1849;<br>337.2737;                       | 235.0976;<br>173.0972;             | [M+Na] <sup>+</sup><br>377.2662;                |
| CAS registration number: 25999-31-9                                              | Monoisotopic mass (Da): 590.3813                                  | [M+Na] <sup>+</sup> ;<br>[M+NH <sub>4</sub> ] <sup>+</sup> | 613.3711;<br>608.4157                    | 95.0855;<br>133.1012;<br>91.0542             | 121.0659;<br>157.0659;<br>191.1078 | 559.3394;<br>557.3500;<br>359.2557;<br>481.2561 |
| ChemSpider ID:                                                                   |                                                                   |                                                            |                                          |                                              |                                    |                                                 |



| Group/Class - Pharmacologically active Substance                                 | Physicochemical properties                                         | Monitored ion                     | Theoretical exact mass MS ( <i>m/z</i> ) | Fragment ions ( <i>m/z</i> ) MS <sup>2</sup> |                    |                                   |
|----------------------------------------------------------------------------------|--------------------------------------------------------------------|-----------------------------------|------------------------------------------|----------------------------------------------|--------------------|-----------------------------------|
|                                                                                  |                                                                    |                                   |                                          | [M+H] <sup>+</sup>                           | [M-H] <sup>-</sup> | Others                            |
| 4514598                                                                          | pKa (strongest acidic): 2.64                                       |                                   |                                          |                                              |                    |                                   |
| PubChem CID: 5360807                                                             | pKa (strongest basic): -                                           |                                   |                                          |                                              |                    | [M+NH <sub>4</sub> ] <sup>+</sup> |
| 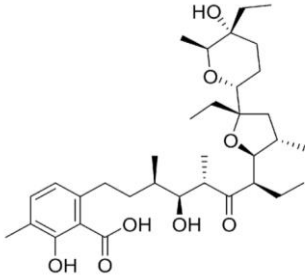 | Partition coefficient (Log P): 7.665                               |                                   |                                          |                                              |                    | 237.1849;                         |
|                                                                                  | Intrinsic solubility (mg mL <sup>-1</sup> ): -5.983 (Low)          |                                   |                                          |                                              |                    | 573.3786;                         |
|                                                                                  |                                                                    |                                   |                                          |                                              |                    | 91.0542;                          |
|                                                                                  |                                                                    |                                   |                                          |                                              |                    | 133.1012;                         |
|                                                                                  |                                                                    |                                   |                                          |                                              |                    | 95.0855                           |
| <i>Maduramicin</i>                                                               | Molecular formula: C <sub>47</sub> H <sub>80</sub> O <sub>17</sub> | [M+H] <sup>+</sup> ;              | 917.5468;                                | 877.5284;                                    | 112.0530;          | [M+Na] <sup>+</sup>               |
|                                                                                  |                                                                    | [M-H] <sup>-</sup> ;              | 915.5323;                                | 633.4337;                                    | 84.0217;           | 877.5284;                         |
| CAS registration number: 79356-08-4                                              |                                                                    | [M+Na] <sup>+</sup> ;             | 939.5288;                                | 451.2666;                                    | 613.3593;          | 451.2666;                         |
|                                                                                  | Monoisotopic mass (Da): 916.5390                                   | [M+NH <sub>4</sub> ] <sup>+</sup> | 934.5734                                 | 473.2878;                                    | 99.0452;           | 473.2878;                         |
|                                                                                  |                                                                    |                                   |                                          | 433.2562                                     | 839.5162           | 433.2562;                         |
| ChemSpider ID:                                                                   |                                                                    |                                   |                                          |                                              |                    | 397.1833                          |

| Group/Class - Pharmacologically active Substance                                  | Physicochemical properties                                         | Monitored ion                     | Theoretical exact mass MS ( <i>m/z</i> ) | Fragment ions ( <i>m/z</i> ) MS <sup>2</sup> |                    |                                   |
|-----------------------------------------------------------------------------------|--------------------------------------------------------------------|-----------------------------------|------------------------------------------|----------------------------------------------|--------------------|-----------------------------------|
|                                                                                   |                                                                    |                                   |                                          | [M+H] <sup>+</sup>                           | [M-H] <sup>-</sup> | Others                            |
| 169976                                                                            | pKa (strongest acidic): 4.01                                       |                                   |                                          |                                              |                    |                                   |
| PubChem CID: 196129                                                               | pKa (strongest basic): -                                           |                                   |                                          |                                              |                    | [M+NH <sub>4</sub> ] <sup>+</sup> |
| 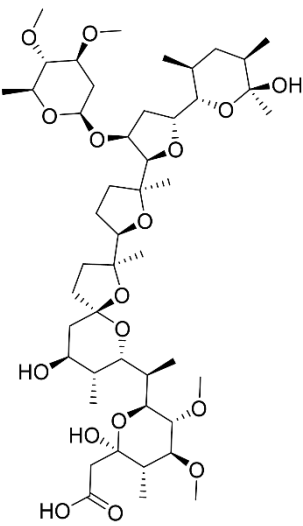 | Partition coefficient (Log P): 4.774                               |                                   |                                          |                                              |                    | 629.4047;                         |
|                                                                                   | Intrinsic solubility (mg mL <sup>-1</sup> ): -3.941 (High)         |                                   |                                          |                                              |                    | 375.2530;                         |
|                                                                                   |                                                                    |                                   |                                          |                                              |                    | 109.1012;                         |
|                                                                                   |                                                                    |                                   |                                          |                                              |                    | 67.0542;                          |
|                                                                                   |                                                                    |                                   |                                          |                                              |                    | 91.0542                           |
| <i>Monensin (Monensin A)</i>                                                      | Molecular formula: C <sub>36</sub> H <sub>62</sub> O <sub>11</sub> | [M+H] <sup>+</sup> ;              | 671.4365;                                | 461.2874;                                    | 87.0452;           | [M+Na] <sup>+</sup>               |
|                                                                                   |                                                                    | [M-H] <sup>-</sup> ;              | 669.4219;                                | 479.2979;                                    | 101.0608;          | 675.4079;                         |
| CAS registration number: 17090-79-8                                               |                                                                    | [M+Na] <sup>+</sup> ;             | 693.4184;                                | 443.2768;                                    | 137.0972;          | 461.2874;                         |
|                                                                                   | Monoisotopic mass (Da): 670.4287                                   | [M+NH <sub>4</sub> ] <sup>+</sup> | 688.4630                                 | 501.3187;                                    | 71.0502;           | 581.3806;                         |
|                                                                                   |                                                                    |                                   |                                          | 461.2000                                     | 85.0295            | 479.2979;                         |
| ChemSpider ID:                                                                    |                                                                    |                                   |                                          |                                              |                    | 443.2768                          |

| Group/Class - Pharmacologically active Substance                                 | Physicochemical properties                                         | Monitored ion                     | Theoretical exact mass MS ( <i>m/z</i> ) | Fragment ions ( <i>m/z</i> ) MS <sup>2</sup> |                    |                                   |
|----------------------------------------------------------------------------------|--------------------------------------------------------------------|-----------------------------------|------------------------------------------|----------------------------------------------|--------------------|-----------------------------------|
|                                                                                  |                                                                    |                                   |                                          | [M+H] <sup>+</sup>                           | [M-H] <sup>-</sup> | Others                            |
| 389937                                                                           | pKa (strongest acidic): 4.24                                       |                                   |                                          |                                              |                    |                                   |
| PubChem CID: 441145                                                              | pKa (strongest basic): -                                           |                                   |                                          |                                              |                    | [M+NH <sub>4</sub> ] <sup>+</sup> |
| 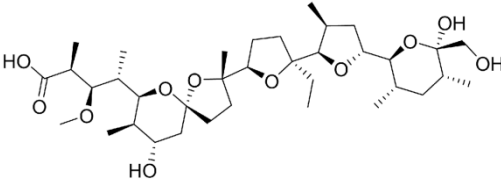 | Partition coefficient (Log P): 4.816                               |                                   |                                          |                                              |                    | 635.4154;                         |
|                                                                                  | Intrinsic solubility (mg mL <sup>-1</sup> ): -5.073 (Low)          |                                   |                                          |                                              |                    | 461.3264;                         |
|                                                                                  |                                                                    |                                   |                                          |                                              |                    | 125.0961;                         |
|                                                                                  |                                                                    |                                   |                                          |                                              |                    | 149.0961;                         |
|                                                                                  |                                                                    |                                   |                                          |                                              |                    | 91.0542                           |
| <i>Narasin (Narasin A)</i>                                                       | Molecular formula: C <sub>43</sub> H <sub>72</sub> O <sub>11</sub> | [M+H] <sup>+</sup> ;              | 765.5147;                                | 431.2404;                                    | 255.1602;          | [M+Na] <sup>+</sup>               |
|                                                                                  |                                                                    | [M-H] <sup>-</sup> ;              | 763.5002;                                | 403.2455;                                    | 87.0452;           | 431.2424;                         |
| CAS registration number: 55134-13-9                                              |                                                                    | [M+Na] <sup>+</sup> ;             | 787.4967;                                | 207.1356;                                    | 69.0346;           | 403.2455;                         |
|                                                                                  | Monoisotopic mass (Da): 764.5069                                   | [M+NH <sub>4</sub> ] <sup>+</sup> | 782.5413                                 | 531.3316;                                    | 83.0502;           | 207.1356;                         |
|                                                                                  |                                                                    |                                   |                                          | 279.1567                                     | 99.0815            | 531.3316;                         |
| ChemSpider ID:                                                                   |                                                                    |                                   |                                          |                                              |                    | 279.1567                          |

| Group/Class - Pharmacologically active Substance                                 | Physicochemical properties                                                       | Monitored ion        | Theoretical exact mass MS ( <i>m/z</i> ) | Fragment ions ( <i>m/z</i> ) MS <sup>2</sup> |                    |                                   |
|----------------------------------------------------------------------------------|----------------------------------------------------------------------------------|----------------------|------------------------------------------|----------------------------------------------|--------------------|-----------------------------------|
|                                                                                  |                                                                                  |                      |                                          | [M+H] <sup>+</sup>                           | [M-H] <sup>-</sup> | Others                            |
| 58911                                                                            | pKa (strongest acidic): 4.5                                                      |                      |                                          |                                              |                    |                                   |
| PubChem CID: 65452                                                               | pKa (strongest basic): -                                                         |                      |                                          |                                              |                    | [M+NH <sub>4</sub> ] <sup>+</sup> |
| 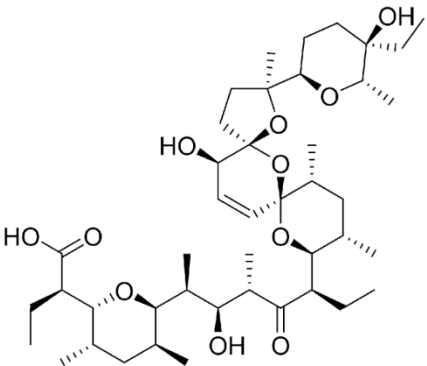 | Partition coefficient (Log P): 7.877                                             |                      |                                          |                                              |                    | 373.2373;                         |
|                                                                                  | Intrinsic solubility (mg mL <sup>-1</sup> ): -7.343 (Low)                        |                      |                                          |                                              |                    | 91.0542;                          |
|                                                                                  |                                                                                  |                      |                                          |                                              |                    | 95.0855;                          |
|                                                                                  |                                                                                  |                      |                                          |                                              |                    | 165.1274;                         |
|                                                                                  |                                                                                  |                      |                                          |                                              |                    | 81.0699                           |
| <i>Nicarbazin (4,4'-Dinitrocarbanilide - DNC)</i>                                | Molecular formula: C <sub>13</sub> H <sub>10</sub> N <sub>4</sub> O <sub>5</sub> | [M+H] <sup>+</sup> ; | 303.0724;                                | 93.0573;                                     | 137.0357;          | [M+Na] <sup>+</sup>               |
| CAS registration number: 587-90-6                                                |                                                                                  | [M-H] <sup>-</sup> ; | 301.0578;                                | 139.0502;                                    | 107.0376;          | 248.9781;                         |
|                                                                                  |                                                                                  | [M+Na] <sup>+</sup>  | 325.0543                                 | 66.0464;                                     | 91.0427;           | 245.0067;                         |
|                                                                                  | Monoisotopic mass (Da): 302.0646                                                 |                      |                                          | 65.0386;                                     | 65.9985;           | 125.0709;                         |
|                                                                                  |                                                                                  |                      |                                          | 74.0151                                      | 90.0348            | 169.0346;                         |
| ChemSpider ID:                                                                   |                                                                                  |                      |                                          |                                              |                    | 219.0012                          |

| Group/Class - Pharmacologically active Substance                                 | Physicochemical properties                                                        | Monitored ion                                                       | Theoretical exact mass MS ( <i>m/z</i> ) | Fragment ions ( <i>m/z</i> ) MS <sup>2</sup>                |                                                             |                                                                        |
|----------------------------------------------------------------------------------|-----------------------------------------------------------------------------------|---------------------------------------------------------------------|------------------------------------------|-------------------------------------------------------------|-------------------------------------------------------------|------------------------------------------------------------------------|
|                                                                                  |                                                                                   |                                                                     |                                          | [M+H] <sup>+</sup>                                          | [M-H] <sup>-</sup>                                          | Others                                                                 |
| 9137                                                                             | pKa (strongest acidic): 10.99                                                     |                                                                     |                                          |                                                             |                                                             |                                                                        |
| PubChem CID: 9509                                                                | pKa (strongest basic): -                                                          |                                                                     |                                          |                                                             |                                                             |                                                                        |
| 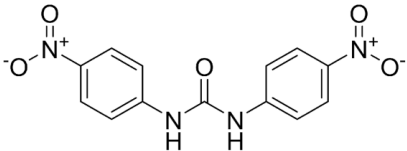 | Partition coefficient (Log P): 2.999                                              |                                                                     |                                          |                                                             |                                                             |                                                                        |
|                                                                                  | Intrinsic solubility (mg mL <sup>-1</sup> ): -4.256 (Moderate)                    |                                                                     |                                          |                                                             |                                                             |                                                                        |
|                                                                                  |                                                                                   |                                                                     |                                          |                                                             |                                                             |                                                                        |
| <i>Robenidine</i>                                                                | Molecular formula: C <sub>15</sub> H <sub>13</sub> Cl <sub>2</sub> N <sub>5</sub> | [M+H] <sup>+</sup> ;<br>[M-H] <sup>-</sup> ;<br>[M+Na] <sup>+</sup> | 334.0621;<br>332.0475;<br>356.0440       | 138.0105;<br>139.0058;<br>155.0371;<br>75.0229;<br>140.0262 | 195.0443;<br>153.0225;<br>115.0302;<br>125.0161;<br>89.0397 | [M+Na] <sup>+</sup><br>107.0328;<br>133.0760;<br>125.0153;<br>218.0330 |
| CAS registration number: 25875-51-8                                              | Monoisotopic mass (Da): 333.0543                                                  |                                                                     |                                          |                                                             |                                                             |                                                                        |
| ChemSpider ID:                                                                   |                                                                                   |                                                                     |                                          |                                                             |                                                             |                                                                        |

| Group/Class - Pharmacologically active Substance                                 | Physicochemical properties                                                                            | Monitored ion                                              | Theoretical exact mass MS ( <i>m/z</i> ) | Fragment ions ( <i>m/z</i> ) MS <sup>2</sup> |                                    |                                                |
|----------------------------------------------------------------------------------|-------------------------------------------------------------------------------------------------------|------------------------------------------------------------|------------------------------------------|----------------------------------------------|------------------------------------|------------------------------------------------|
|                                                                                  |                                                                                                       |                                                            |                                          | [M+H] <sup>+</sup>                           | [M-H] <sup>-</sup>                 | Others                                         |
| 30671                                                                            | pKa (strongest acidic): -                                                                             |                                                            |                                          |                                              |                                    |                                                |
| PubChem CID: 33196                                                               | pKa (strongest basic): 2.01                                                                           |                                                            |                                          |                                              |                                    |                                                |
| 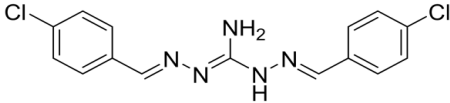 | Partition coefficient (Log P): 3.985<br><br>Intrinsic solubility (mg mL <sup>-1</sup> ): -5.533 (Low) |                                                            |                                          |                                              |                                    |                                                |
| <i>Salinomycin</i>                                                               | Molecular formula: C <sub>42</sub> H <sub>70</sub> O <sub>11</sub>                                    | [M+H] <sup>+</sup> ;<br>[M-H] <sup>-</sup> ;               | 751.4991;<br>749.4845;                   | 431.2474;<br>265.1410;                       | 241.1434;<br>407.2428;             | [M+Na] <sup>+</sup><br>431.2474;               |
| CAS registration number: 53003-10-4                                              | Monoisotopic mass (Da): 750.4913                                                                      | [M+Na] <sup>+</sup> ;<br>[M+NH <sub>4</sub> ] <sup>+</sup> | 773.4810;<br>768.5256                    | 207.1356;<br>91.0542;<br>67.0542             | 337.2010;<br>221.1172;<br>259.1540 | 265.1410;<br>207.1356;<br>91.0542;<br>530.3155 |
| ChemSpider ID: 2342058                                                           |                                                                                                       |                                                            |                                          |                                              |                                    |                                                |

| Group/Class - Pharmacologically active Substance                                                                | Physicochemical properties                                                                                                                                                            | Monitored ion                              | Theoretical exact mass MS ( <i>m/z</i> ) | Fragment ions ( <i>m/z</i> ) MS <sup>2</sup>                |                                                              |                                                                                                |
|-----------------------------------------------------------------------------------------------------------------|---------------------------------------------------------------------------------------------------------------------------------------------------------------------------------------|--------------------------------------------|------------------------------------------|-------------------------------------------------------------|--------------------------------------------------------------|------------------------------------------------------------------------------------------------|
|                                                                                                                 |                                                                                                                                                                                       |                                            |                                          | [M+H] <sup>+</sup>                                          | [M-H] <sup>-</sup>                                           | Others                                                                                         |
| PubChem CID:<br>3085092<br><br>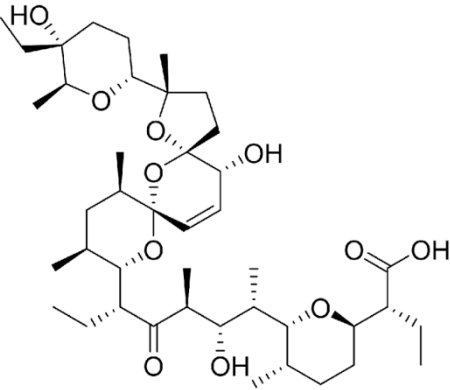 | pKa (strongest acidic):<br>4.45<br><br>pKa (strongest basic): -<br><br>Partition coefficient<br>(Log P): 7.512<br><br>Intrinsic solubility<br>(mg mL <sup>-1</sup> ): -6.995<br>(Low) |                                            |                                          |                                                             |                                                              | [M+NH <sub>4</sub> ] <sup>+</sup><br>225.1485;<br>91.0542;<br>67.0542;<br>81.0699;<br>165.1274 |
| <i>Toltrazuril</i><br><br>CAS registration number:<br>69004-03-1<br><br>ChemSpider ID:                          | Molecular formula:<br>C <sub>18</sub> H <sub>14</sub> F <sub>3</sub> N <sub>3</sub> O <sub>4</sub> S<br><br>Monoisotopic mass<br>(Da): 425.0652                                       | [M+H] <sup>+</sup> ;<br>[M-H] <sup>-</sup> | 426.0730;<br>424.0584                    | 192.9929;<br>348.0700<br>325.1057;<br>283.0399;<br>148.0393 | 316.9813;<br>404.9767;<br>213.0919;<br>138.0274;<br>424.4000 |                                                                                                |

| Group/Class - Pharmacologically active Substance                                                                           | Physicochemical properties                                                                                                                                                            | Monitored ion      | Theoretical exact mass MS ( <i>m/z</i> ) | Fragment ions ( <i>m/z</i> ) MS <sup>2</sup>                |                    |        |
|----------------------------------------------------------------------------------------------------------------------------|---------------------------------------------------------------------------------------------------------------------------------------------------------------------------------------|--------------------|------------------------------------------|-------------------------------------------------------------|--------------------|--------|
|                                                                                                                            |                                                                                                                                                                                       |                    |                                          | [M+H] <sup>+</sup>                                          | [M-H] <sup>-</sup> | Others |
| 61859<br><br>PubChem CID:<br>68591<br><br>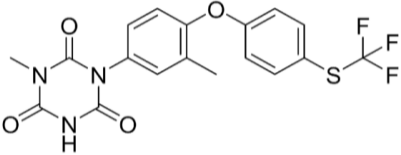 | pKa (strongest acidic):<br>7.42<br><br>pKa (strongest basic): -<br><br>Partition coefficient<br>(Log P): 5.053<br><br>Intrinsic solubility<br>(mg mL <sup>-1</sup> ): -6.816<br>(Low) |                    |                                          |                                                             |                    |        |
| <i>Trimethoprim</i><br><br>CAS registration number:<br>738-70-5<br><br>ChemSpider ID:                                      | Molecular formula:<br>C <sub>14</sub> H <sub>18</sub> N <sub>4</sub> O <sub>3</sub><br><br>Massa<br>monoisotópica (Da):<br>290.1373                                                   | [M+H] <sup>+</sup> | 291.1452                                 | 275.1137;<br>261.0982;<br>245.1033;<br>81.0447;<br>123.0665 |                    |        |



| Group/Class - Pharmacologically active Substance                                 | Physicochemical properties                                        | Monitored ion      | Theoretical exact mass MS ( <i>m/z</i> ) | Fragment ions ( <i>m/z</i> ) MS <sup>2</sup> |                    |        |
|----------------------------------------------------------------------------------|-------------------------------------------------------------------|--------------------|------------------------------------------|----------------------------------------------|--------------------|--------|
|                                                                                  |                                                                   |                    |                                          | [M+H] <sup>+</sup>                           | [M-H] <sup>-</sup> | Others |
| 5376                                                                             |                                                                   |                    |                                          |                                              |                    |        |
| PubChem CID: 5578                                                                | pKa (strongest acidic): -                                         |                    |                                          |                                              |                    |        |
|                                                                                  | pKa (strongest basic): 7.16                                       |                    |                                          |                                              |                    |        |
| 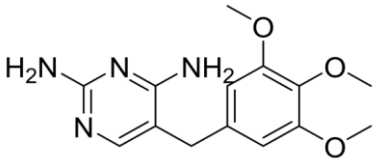 | Partition coefficient (Log P): 1.284                              |                    |                                          |                                              |                    |        |
|                                                                                  | Intrinsic solubility (mg mL <sup>-1</sup> ): -2.801 (High)        |                    |                                          |                                              |                    |        |
| <b>Anti-inflammatories/Steroidal</b>                                             |                                                                   |                    |                                          |                                              |                    |        |
| <i>Prednisolone</i>                                                              | Molecular formula: C <sub>21</sub> H <sub>28</sub> O <sub>5</sub> | [M+H] <sup>+</sup> | 361.2010                                 | 343.1901;                                    |                    |        |
| CAS registration number: 50-24-8                                                 | Monoisotopic mass (Da): 360.1931                                  |                    |                                          | 147.0804;                                    |                    |        |
|                                                                                  |                                                                   |                    |                                          | 121.0648;                                    |                    |        |
|                                                                                  |                                                                   |                    |                                          | 91.0542;                                     |                    |        |
|                                                                                  |                                                                   |                    |                                          | 325.1798                                     |                    |        |

| Group/Class - Pharmacologically active Substance                                 | Physicochemical properties                                           | Monitored ion                              | Theoretical exact mass MS ( <i>m/z</i> ) | Fragment ions ( <i>m/z</i> ) MS <sup>2</sup> |                                    |        |
|----------------------------------------------------------------------------------|----------------------------------------------------------------------|--------------------------------------------|------------------------------------------|----------------------------------------------|------------------------------------|--------|
|                                                                                  |                                                                      |                                            |                                          | [M+H] <sup>+</sup>                           | [M-H] <sup>-</sup>                 | Others |
| ChemSpider ID:<br>5552                                                           | pKa (strongest acidic):<br>12.59                                     |                                            |                                          |                                              |                                    |        |
| PubChem CID:<br>5755                                                             | pKa (strongest basic): -                                             |                                            |                                          |                                              |                                    |        |
| 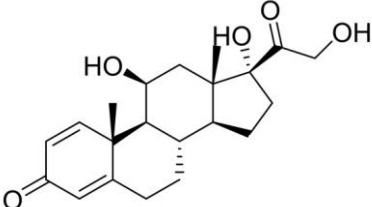 | Partition coefficient<br>(Log P): 1.273                              |                                            |                                          |                                              |                                    |        |
|                                                                                  | Intrinsic solubility<br>(mg mL <sup>-1</sup> ): -3.46 (High)         |                                            |                                          |                                              |                                    |        |
| <i>Prednisone</i>                                                                | Molecular formula:<br>C <sub>21</sub> H <sub>26</sub> O <sub>5</sub> | [M+H] <sup>+</sup> ;<br>[M-H] <sup>-</sup> | 359.1853;<br>357.1708                    | 147.0804;<br>91.0542;                        | 327.1602;<br>123.0452;             |        |
| CAS registration number:<br>53-03-2                                              | Monoisotopic mass<br>(Da): 358.1775                                  |                                            |                                          | 359.1853;<br>341.1747;<br>237.1271           | 149.0608;<br>122.0373;<br>121.0659 |        |
| ChemSpider ID:<br>5656                                                           |                                                                      |                                            |                                          |                                              |                                    |        |

| Group/Class - Pharmacologically active Substance                                                           | Physicochemical properties                                                                                                                                                  | Monitored ion      | Theoretical exact mass MS ( <i>m/z</i> ) | Fragment ions ( <i>m/z</i> ) MS <sup>2</sup> |                    |        |
|------------------------------------------------------------------------------------------------------------|-----------------------------------------------------------------------------------------------------------------------------------------------------------------------------|--------------------|------------------------------------------|----------------------------------------------|--------------------|--------|
|                                                                                                            |                                                                                                                                                                             |                    |                                          | [M+H] <sup>+</sup>                           | [M-H] <sup>-</sup> | Others |
| PubChem CID: 5865<br><br>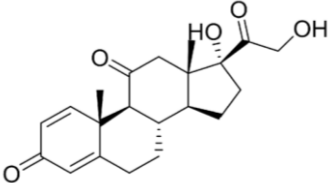  | pKa (strongest acidic): 12.58<br><br>pKa (strongest basic): -<br><br>Partition coefficient (Log P): 1.659<br><br>Intrinsic solubility (mg mL <sup>-1</sup> ): -3.379 (High) |                    |                                          |                                              |                    |        |
| <b>Anti-inflammatories Prospect/Steroidal</b><br><i>Isoflupredone acetate/9-Fluoroprednisolone acetate</i> | Molecular formula: C <sub>23</sub> H <sub>29</sub> FO <sub>6</sub>                                                                                                          | [M+H] <sup>+</sup> | 421.2021                                 | 341.1747;<br>91.0542;<br>147.0804;           |                    |        |
| CAS registration number:                                                                                   | Monoisotopic mass (Da): 420.1943                                                                                                                                            |                    |                                          | 265.1587;<br>121.0648                        |                    |        |

| Group/Class - Pharmacologically active Substance                                 | Physicochemical properties                                                          | Monitored ion      | Theoretical exact mass MS ( <i>m/z</i> ) | Fragment ions ( <i>m/z</i> ) MS <sup>2</sup> |                    |        |
|----------------------------------------------------------------------------------|-------------------------------------------------------------------------------------|--------------------|------------------------------------------|----------------------------------------------|--------------------|--------|
|                                                                                  |                                                                                     |                    |                                          | [M+H] <sup>+</sup>                           | [M-H] <sup>-</sup> | Others |
| 338-98-7                                                                         |                                                                                     |                    |                                          |                                              |                    |        |
| ChemSpider ID:<br>194836                                                         | pKa (strongest acidic):<br>12.57                                                    |                    |                                          |                                              |                    |        |
| PubChem CID:<br>224246                                                           | pKa (strongest basic): -<br><br>Partition coefficient (Log P): 1.758                |                    |                                          |                                              |                    |        |
| 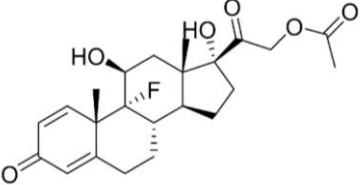 | Intrinsic solubility (mg mL <sup>-1</sup> ): -3.834 (High)                          |                    |                                          |                                              |                    |        |
| <i>Flumetasone</i>                                                               | Molecular formula:<br>C <sub>22</sub> H <sub>28</sub> F <sub>2</sub> O <sub>5</sub> | [M+H] <sup>+</sup> | 411.1978                                 | 121.0648;<br>253.1223;<br>91.0542;           |                    |        |
| CAS registration number:<br>2135-17-3                                            | Monoisotopic mass (Da): 410.1899                                                    |                    |                                          | 391.1915;<br>95.0491                         |                    |        |
| ChemSpider ID:<br>15632                                                          | pKa (strongest acidic):                                                             |                    |                                          |                                              |                    |        |

| Group/Class - Pharmacologically active Substance                                                              | Physicochemical properties                                                                                                                              | Monitored ion                              | Theoretical exact mass MS ( <i>m/z</i> ) | Fragment ions ( <i>m/z</i> ) MS <sup>2</sup> |                                     |        |
|---------------------------------------------------------------------------------------------------------------|---------------------------------------------------------------------------------------------------------------------------------------------------------|--------------------------------------------|------------------------------------------|----------------------------------------------|-------------------------------------|--------|
|                                                                                                               |                                                                                                                                                         |                                            |                                          | [M+H] <sup>+</sup>                           | [M-H] <sup>-</sup>                  | Others |
| PubChem CID:<br>16490<br><br>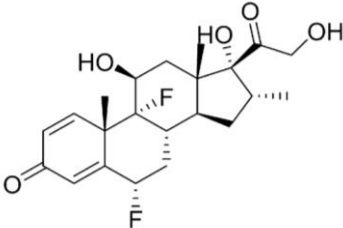 | 12.42<br><br>pKa (strongest basic): -<br><br>Partition coefficient (Log P): 1.342<br><br>Intrinsic solubility (mg mL <sup>-1</sup> ): -3.918 (Moderate) |                                            |                                          |                                              |                                     |        |
| <b>Anti-Inflammatory/Non-Steroidal</b>                                                                        |                                                                                                                                                         |                                            |                                          |                                              |                                     |        |
| <i>Mefenamic acid</i>                                                                                         | Molecular formula:<br>C <sub>15</sub> H <sub>15</sub> NO <sub>2</sub>                                                                                   | [M+H] <sup>+</sup> ;<br>[M-H] <sup>-</sup> | 242.1176;<br>240.1030                    | 224.1070;<br>209.0835;<br>180.0808;          | 196.1132;<br>192.0819;<br>180.0819; |        |
| CAS registration number:<br>61-68-7                                                                           | Monoisotopic mass (Da): 241.1097                                                                                                                        |                                            |                                          | 208.0757;<br>181.0886                        | 194.0975;<br>179.0866               |        |
| ChemSpider ID:                                                                                                |                                                                                                                                                         |                                            |                                          |                                              |                                     |        |

| Group/Class - Pharmacologically active Substance                                 | Physicochemical properties                                           | Monitored ion                           | Theoretical exact mass MS ( <i>m/z</i> ) | Fragment ions ( <i>m/z</i> ) MS <sup>2</sup>     |                                        |        |
|----------------------------------------------------------------------------------|----------------------------------------------------------------------|-----------------------------------------|------------------------------------------|--------------------------------------------------|----------------------------------------|--------|
|                                                                                  |                                                                      |                                         |                                          | [M+H] <sup>+</sup>                               | [M-H] <sup>-</sup>                     | Others |
| 3904                                                                             | pKa (strongest acidic): 2.47                                         |                                         |                                          |                                                  |                                        |        |
| PubChem CID: 4044                                                                | pKa (strongest basic): 5.04                                          |                                         |                                          |                                                  |                                        |        |
| 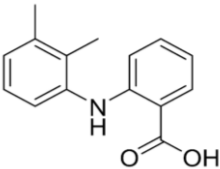 | Partition coefficient (Log P): 4.402                                 |                                         |                                          |                                                  |                                        |        |
|                                                                                  | Intrinsic solubility (mg mL <sup>-1</sup> ): -4.068 (Moderate)       |                                         |                                          |                                                  |                                        |        |
| <i>Tolfenamic acid</i>                                                           | Molecular formula: C <sub>14</sub> H <sub>12</sub> ClNO <sub>2</sub> | [M+H] <sup>+</sup> ; [M-H] <sup>-</sup> | 262.0629; 260.0484                       | 180.0804; 229.0281; 244.0517; 209.0837; 208.0763 | 216.0575; 228.0211; 242.0367; 107.0496 |        |
| CAS registration number: 13710-19-5                                              | Monoisotopic mass (Da): 261.0551                                     |                                         |                                          |                                                  |                                        |        |
| ChemSpider ID: 3904                                                              | pKa (strongest acidic): 4.17                                         |                                         |                                          |                                                  |                                        |        |

| Group/Class - Pharmacologically active Substance                                                               | Physicochemical properties                                                                                                                                            | Monitored ion      | Theoretical exact mass MS ( <i>m/z</i> ) | Fragment ions ( <i>m/z</i> ) MS <sup>2</sup> |                                                              |        |
|----------------------------------------------------------------------------------------------------------------|-----------------------------------------------------------------------------------------------------------------------------------------------------------------------|--------------------|------------------------------------------|----------------------------------------------|--------------------------------------------------------------|--------|
|                                                                                                                |                                                                                                                                                                       |                    |                                          | [M+H] <sup>+</sup>                           | [M-H] <sup>-</sup>                                           | Others |
| PubChem CID:<br>610479<br><br>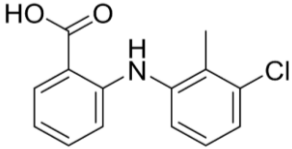 | pK <sub>a</sub> (strongest basic):<br>1.8<br><br>Partition coefficient<br>(Log P): 5.488<br><br>Intrinsic solubility<br>(mg mL <sup>-1</sup> ): -4.301<br>(Moderate)  |                    |                                          |                                              |                                                              |        |
| <i>Carprofen</i><br><br>CAS registration number:<br>53716-49-7<br><br>ChemSpider ID:<br>2483                   | Molecular formula:<br>C <sub>15</sub> H <sub>12</sub> ClNO <sub>2</sub><br><br>Monoisotopic mass<br>(Da): 273.0551<br><br>pK <sub>a</sub> (strongest acidic):<br>4.11 | [M-H] <sup>-</sup> | 272.0484                                 |                                              | 228.0586;<br>226.0429;<br>190.0662;<br>188.0506;<br>162.0349 |        |

| Group/Class - Pharmacologically active Substance                                                             | Physicochemical properties                                                                                                                       | Monitored ion                              | Theoretical exact mass MS ( <i>m/z</i> ) | Fragment ions ( <i>m/z</i> ) MS <sup>2</sup>                |                                                              |        |
|--------------------------------------------------------------------------------------------------------------|--------------------------------------------------------------------------------------------------------------------------------------------------|--------------------------------------------|------------------------------------------|-------------------------------------------------------------|--------------------------------------------------------------|--------|
|                                                                                                              |                                                                                                                                                  |                                            |                                          | [M+H] <sup>+</sup>                                          | [M-H] <sup>-</sup>                                           | Others |
| PubChem CID:<br>2581<br><br>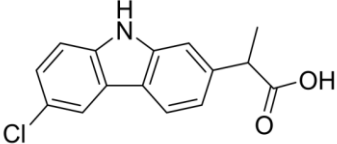 | pKa (strongest basic): -<br><br>Partition coefficient (Log P): 3.876<br><br>Intrinsic solubility (mg mL <sup>-1</sup> ): -4.876 (Low)            |                                            |                                          |                                                             |                                                              |        |
| <i>Ketoprofen</i><br><br>CAS registration number:<br>22071-15-4<br><br>ChemSpider ID:<br>3693                | Molecular formula:<br>C <sub>16</sub> H <sub>14</sub> O <sub>3</sub><br><br>Monoisotopic mass (Da): 254.0938<br><br>pKa (strongest acidic):<br>4 | [M+H] <sup>+</sup> ;<br>[M-H] <sup>-</sup> | 255.1016;<br>253.0870                    | 105.0335;<br>209.0961;<br>95.0491;<br>255.1016;<br>105.0447 | 197.0608;<br>185.0608;<br>169.0660;<br>209.0961;<br>194.0726 |        |



| Group/Class - Pharmacologically active Substance                                                             | Physicochemical properties                                                                                                                                           | Monitored ion                              | Theoretical exact mass MS ( <i>m/z</i> ) | Fragment ions ( <i>m/z</i> ) MS <sup>2</sup>                 |                                    |        |
|--------------------------------------------------------------------------------------------------------------|----------------------------------------------------------------------------------------------------------------------------------------------------------------------|--------------------------------------------|------------------------------------------|--------------------------------------------------------------|------------------------------------|--------|
|                                                                                                              |                                                                                                                                                                      |                                            |                                          | [M+H] <sup>+</sup>                                           | [M-H] <sup>-</sup>                 | Others |
| PubChem CID:<br>3825<br><br>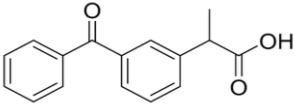 | pKa (strongest basic): -<br><br>Partition coefficient (Log P): 3.613<br><br>Intrinsic solubility (mg mL <sup>-1</sup> ): -3.854 (Moderate)                           |                                            |                                          |                                                              |                                    |        |
| <i>Diclofenac</i><br><br>CAS registration number:<br>15307-86-5<br><br>ChemSpider ID:<br>2925                | Molecular formula:<br>C <sub>14</sub> H <sub>11</sub> Cl <sub>2</sub> NO <sub>2</sub><br><br>Monoisotopic mass (Da): 295.0161<br><br>pKa (strongest acidic):<br>4.01 | [M+H] <sup>+</sup> ;<br>[M-H] <sup>-</sup> | 296.0240;<br>294.0094                    | 214.0418;<br>215.0496;<br>250.0185;<br>169.0648;<br>278.0134 | 250.0185;<br>214.0418;<br>178.0651 |        |

| Group/Class - Pharmacologically active Substance                                                         | Physicochemical properties                                                                                                                                                                       | Monitored ion                              | Theoretical exact mass MS ( <i>m/z</i> ) | Fragment ions ( <i>m/z</i> ) MS <sup>2</sup>                 |                                                             |        |
|----------------------------------------------------------------------------------------------------------|--------------------------------------------------------------------------------------------------------------------------------------------------------------------------------------------------|--------------------------------------------|------------------------------------------|--------------------------------------------------------------|-------------------------------------------------------------|--------|
|                                                                                                          |                                                                                                                                                                                                  |                                            |                                          | [M+H] <sup>+</sup>                                           | [M-H] <sup>-</sup>                                          | Others |
| PubChem CID:<br>3033<br>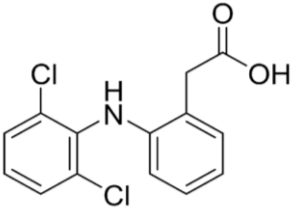 | pK <sub>a</sub> (strongest basic):<br>-1.08<br><br>Partition coefficient<br>(Log P): 4.259<br><br>Intrinsic solubility<br>(mg mL <sup>-1</sup> ): -4.298<br>(Moderate)                           |                                            |                                          |                                                              |                                                             |        |
| <i>Flunixin</i><br><br>CAS registration number:<br>38677-85-9<br><br>ChemSpider ID:<br>34911             | Molecular formula:<br>C <sub>14</sub> H <sub>11</sub> F <sub>3</sub> N <sub>2</sub> O <sub>2</sub><br><br>Monoisotopic mass<br>(Da): 296.0767<br><br>pK <sub>a</sub> (strongest acidic):<br>0.89 | [M+H] <sup>+</sup> ;<br>[M-H] <sup>-</sup> | 297.0845;<br>295.0700                    | 279.0737;<br>277.0782;<br>264.0505;<br>259.0675;<br>236.0556 | 251.0802;<br>209.0520;<br>189.0458;<br>138.0349;<br>74.0037 |        |

| Group/Class - Pharmacologically active Substance                                                              | Physicochemical properties                                                                                                                                            | Monitored ion                              | Theoretical exact mass MS ( <i>m/z</i> ) | Fragment ions ( <i>m/z</i> ) MS <sup>2</sup>               |                                                              |        |
|---------------------------------------------------------------------------------------------------------------|-----------------------------------------------------------------------------------------------------------------------------------------------------------------------|--------------------------------------------|------------------------------------------|------------------------------------------------------------|--------------------------------------------------------------|--------|
|                                                                                                               |                                                                                                                                                                       |                                            |                                          | [M+H] <sup>+</sup>                                         | [M-H] <sup>-</sup>                                           | Others |
| PubChem CID:<br>38081<br><br>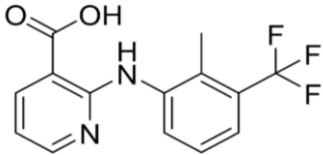 | pK <sub>a</sub> (strongest basic):<br>5.37<br><br>Partition coefficient<br>(Log P): 3.458<br><br>Intrinsic solubility<br>(mg mL <sup>-1</sup> ): -3.995<br>(Moderate) |                                            |                                          |                                                            |                                                              |        |
| <i>Indomethacin</i><br><br>CAS registration number:<br>53-86-1<br><br>ChemSpider ID:<br>3584                  | Molecular formula:<br>C <sub>19</sub> H <sub>16</sub> ClNO <sub>4</sub><br><br>Monoisotopic mass<br>(Da): 357.0762<br><br>pK <sub>a</sub> (strongest acidic):<br>4.38 | [M+H] <sup>+</sup> ;<br>[M-H] <sup>-</sup> | 358.0841;<br>356.0695                    | 138.9945;<br>139.0053;<br>75.0229;<br>74.0151;<br>174.0913 | 312.0797;<br>297.0562;<br>282.0328;<br>158.0611;<br>252.0222 |        |

| Group/Class - Pharmacologically active Substance                                                         | Physicochemical properties                                                                                                                                                        | Monitored ion                              | Theoretical exact mass MS ( <i>m/z</i> ) | Fragment ions ( <i>m/z</i> ) MS <sup>2</sup>              |                                                             |        |
|----------------------------------------------------------------------------------------------------------|-----------------------------------------------------------------------------------------------------------------------------------------------------------------------------------|--------------------------------------------|------------------------------------------|-----------------------------------------------------------|-------------------------------------------------------------|--------|
|                                                                                                          |                                                                                                                                                                                   |                                            |                                          | [M+H] <sup>+</sup>                                        | [M-H] <sup>-</sup>                                          | Others |
| PubChem CID:<br>3715<br>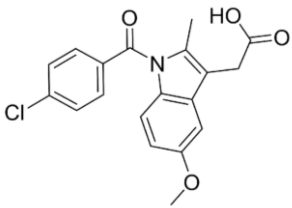 | pKa (strongest basic): -<br><br>Partition coefficient (Log P): 3.53<br><br>Intrinsic solubility (mg mL <sup>-1</sup> ): -4.252 (Moderate)                                         |                                            |                                          |                                                           |                                                             |        |
| <i>Meloxicam</i><br><br>CAS registration number:<br>71125-38-7<br><br>ChemSpider ID:<br>10442740         | Molecular formula:<br>C <sub>14</sub> H <sub>13</sub> N <sub>3</sub> O <sub>4</sub> S <sub>2</sub><br><br>Monoisotopic mass (Da): 351.0342<br><br>pKa (strongest acidic):<br>4.87 | [M+H] <sup>+</sup> ;<br>[M-H] <sup>-</sup> | 352.0420;<br>350.0275                    | 115.0324;<br>68.9793;<br>73.0106;<br>141.0117;<br>88.0215 | 146.0610;<br>286.0656;<br>113.0179;<br>119.0502;<br>97.9944 |        |

| Group/Class - Pharmacologically active Substance                                                             | Physicochemical properties                                                                                                                                | Monitored ion                              | Theoretical exact mass MS ( <i>m/z</i> ) | Fragment ions ( <i>m/z</i> ) MS <sup>2</sup>                 |                                                              |        |
|--------------------------------------------------------------------------------------------------------------|-----------------------------------------------------------------------------------------------------------------------------------------------------------|--------------------------------------------|------------------------------------------|--------------------------------------------------------------|--------------------------------------------------------------|--------|
|                                                                                                              |                                                                                                                                                           |                                            |                                          | [M+H] <sup>+</sup>                                           | [M-H] <sup>-</sup>                                           | Others |
| PubChem CID:<br>54677470<br>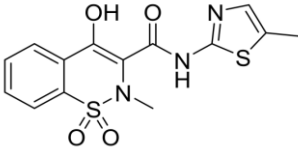 | pKa (strongest basic):<br>0.47<br><br>Partition coefficient<br>(Log P): 1.329<br><br>Intrinsic solubility<br>(mg mL <sup>-1</sup> ): -3.947<br>(Moderate) |                                            |                                          |                                                              |                                                              |        |
| <i>Naproxen</i><br><br>CAS registration number:<br>22204-53-1<br><br>ChemSpider ID:<br>137720                | Molecular formula:<br>C <sub>14</sub> H <sub>14</sub> O <sub>3</sub><br><br>Monoisotopic mass<br>(Da): 230.0938<br><br>pKa (strongest acidic):<br>4.24    | [M+H] <sup>+</sup> ;<br>[M-H] <sup>-</sup> | 231.1016;<br>229.0870                    | 185.0961;<br>170.0726;<br>141.0699;<br>154.0777;<br>153.0699 | 169.0659;<br>170.0737;<br>139.0553;<br>141.0710;<br>115.0553 |        |

| Group/Class - Pharmacologically active Substance                                                               | Physicochemical properties                                                                                                                                           | Monitored ion      | Theoretical exact mass MS ( <i>m/z</i> ) | Fragment ions ( <i>m/z</i> ) MS <sup>2</sup> |                                                             |        |
|----------------------------------------------------------------------------------------------------------------|----------------------------------------------------------------------------------------------------------------------------------------------------------------------|--------------------|------------------------------------------|----------------------------------------------|-------------------------------------------------------------|--------|
|                                                                                                                |                                                                                                                                                                      |                    |                                          | [M+H] <sup>+</sup>                           | [M-H] <sup>-</sup>                                          | Others |
| PubChem CID:<br>156391<br><br>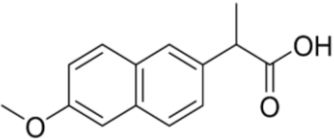 | pKa (strongest basic): -<br><br>Partition coefficient (Log P): 2.986<br><br>Intrinsic solubility (mg mL <sup>-1</sup> ): -3.447 (High)                               |                    |                                          |                                              |                                                             |        |
| <i>Nimesulide</i><br><br>CAS registration number:<br>51803-78-2<br><br>ChemSpider ID:<br>4339                  | Molecular formula:<br>C <sub>13</sub> H <sub>12</sub> N <sub>2</sub> O <sub>5</sub> S<br><br>Monoisotopic mass (Da): 308.0461<br><br>pKa (strongest acidic):<br>6.56 | [M-H] <sup>-</sup> | 307.0394                                 |                                              | 307.0394;<br>229.0619;<br>198.0561;<br>122.0248;<br>78.9859 |        |

| Group/Class - Pharmacologically active Substance                                                             | Physicochemical properties                                                                                                                                           | Monitored ion      | Theoretical exact mass MS ( <i>m/z</i> ) | Fragment ions ( <i>m/z</i> ) MS <sup>2</sup>              |                    |        |
|--------------------------------------------------------------------------------------------------------------|----------------------------------------------------------------------------------------------------------------------------------------------------------------------|--------------------|------------------------------------------|-----------------------------------------------------------|--------------------|--------|
|                                                                                                              |                                                                                                                                                                      |                    |                                          | [M+H] <sup>+</sup>                                        | [M-H] <sup>-</sup> | Others |
| PubChem CID:<br>4495<br><br>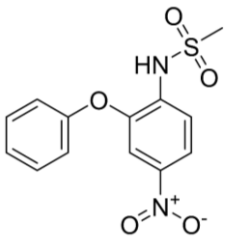 | pKa (strongest basic): -<br><br>Partition coefficient (Log P): 1.787<br><br>Intrinsic solubility (mg mL <sup>-1</sup> ): -3.654 (High)                               |                    |                                          |                                                           |                    |        |
| <i>Piroxycam</i><br><br>CAS registration number:<br>36322-90-4<br><br>ChemSpider ID:<br>10442653             | Molecular formula:<br>C <sub>15</sub> H <sub>13</sub> N <sub>3</sub> O <sub>4</sub> S<br><br>Monoisotopic mass (Da): 331.0621<br><br>pKa (strongest acidic):<br>5.06 | [M+H] <sup>+</sup> | 332.0700                                 | 96.0444;<br>95.0604;<br>136.0867;<br>121.0396;<br>78.0338 |                    |        |

| Group/Class - Pharmacologically active Substance                                                                    | Physicochemical properties                                                                                                                           | Monitored ion      | Theoretical exact mass MS ( <i>m/z</i> ) | Fragment ions ( <i>m/z</i> ) MS <sup>2</sup>               |                    |        |
|---------------------------------------------------------------------------------------------------------------------|------------------------------------------------------------------------------------------------------------------------------------------------------|--------------------|------------------------------------------|------------------------------------------------------------|--------------------|--------|
|                                                                                                                     |                                                                                                                                                      |                    |                                          | [M+H] <sup>+</sup>                                         | [M-H] <sup>-</sup> | Others |
| PubChem CID:<br>54676228<br>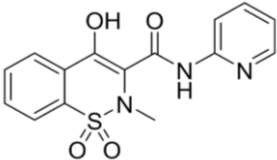        | pKa (strongest basic):<br>3.89<br><br>Partition coefficient<br>(Log P): 0.39<br><br>Intrinsic solubility<br>(mg mL <sup>-1</sup> ): -3.269<br>(High) |                    |                                          |                                                            |                    |        |
| <i>Propyphenazone</i><br><br>CAS registration number:<br>479-92-5<br><br>ChemSpider ID:<br>3646<br><br>PubChem CID: | Molecular formula:<br>C <sub>14</sub> H <sub>18</sub> N <sub>2</sub> O<br><br>Monoisotopic mass<br>(Da): 230.1414<br><br>pKa (strongest acidic): -   | [M+H] <sup>+</sup> | 231.1492                                 | 146.0964;<br>189.1022;<br>112.1121;<br>95.0491;<br>82.0651 |                    |        |



| Group/Class - Pharmacologically active Substance                                         | Physicochemical properties                                                                                                                            | Monitored ion                     | Theoretical exact mass MS ( <i>m/z</i> ) | Fragment ions ( <i>m/z</i> ) MS <sup>2</sup> |                    |                     |
|------------------------------------------------------------------------------------------|-------------------------------------------------------------------------------------------------------------------------------------------------------|-----------------------------------|------------------------------------------|----------------------------------------------|--------------------|---------------------|
|                                                                                          |                                                                                                                                                       |                                   |                                          | [M+H] <sup>+</sup>                           | [M-H] <sup>-</sup> | Others              |
| 3778<br>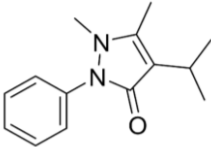 | pK <sub>a</sub> (strongest basic): 0.67<br><br>Partition coefficient (Log P): 2.074<br><br>Intrinsic solubility (mg mL <sup>-1</sup> ): -2.757 (High) |                                   |                                          |                                              |                    |                     |
| <b>Antiparasitic</b>                                                                     |                                                                                                                                                       |                                   |                                          |                                              |                    |                     |
| <i>Avermectin B<sub>1a</sub></i> / <i>Abamectin B<sub>1a</sub></i>                       | Molecular formula: C <sub>48</sub> H <sub>72</sub> O <sub>14</sub>                                                                                    | [M+H] <sup>+</sup> ;              | 873.4995;                                | 69.0335;                                     | 229.1081;          | [M+Na] <sup>+</sup> |
|                                                                                          |                                                                                                                                                       | [M-H] <sup>-</sup> ;              | 871.4849;                                | 145.0859;                                    | 85.0295;           | 69.0335;            |
| CAS registration number: 65195-55-3                                                      |                                                                                                                                                       | [M+Na] <sup>+</sup> ;             | 895.4814;                                | 113.0597;                                    | 84.0217;           | 145.0859;           |
|                                                                                          | Monoisotopic mass (Da): 872.4917                                                                                                                      | [M+NH <sub>4</sub> ] <sup>+</sup> | 890.5260                                 | 305.2111;                                    | 67.0189;           | 113.0597;           |
|                                                                                          |                                                                                                                                                       |                                   |                                          | 193.1587                                     | 835.4638           | 305.2111;           |
| ChemSpider ID:                                                                           |                                                                                                                                                       |                                   |                                          |                                              |                    | 193.1587            |

| Group/Class - Pharmacologically active Substance                                 | Physicochemical properties                                                                                 | Monitored ion                                                                      | Theoretical exact mass MS ( <i>m/z</i> ) | Fragment ions ( <i>m/z</i> ) MS <sup>2</sup> |                    |                                                            |
|----------------------------------------------------------------------------------|------------------------------------------------------------------------------------------------------------|------------------------------------------------------------------------------------|------------------------------------------|----------------------------------------------|--------------------|------------------------------------------------------------|
|                                                                                  |                                                                                                            |                                                                                    |                                          | [M+H] <sup>+</sup>                           | [M-H] <sup>-</sup> | Others                                                     |
| 10286553                                                                         | pKa (strongest acidic): 12.47                                                                              |                                                                                    |                                          |                                              |                    | [M+NH <sub>4</sub> ] <sup>+</sup>                          |
| PubChem CID: 66434889                                                            | pKa (strongest basic): -                                                                                   |                                                                                    |                                          |                                              |                    | 305.2111;<br>113.0597;<br>69.0335;<br>95.0491;<br>145.0859 |
| 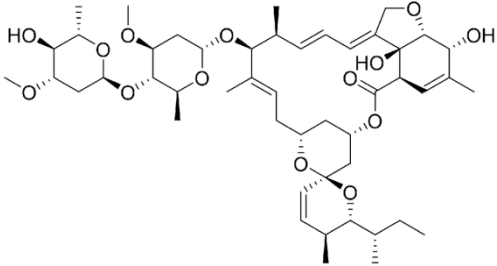 | Partition coefficient (Log P): 5.848<br><br>Intrinsic solubility (mg mL <sup>-1</sup> ): -4.844 (Moderate) |                                                                                    |                                          |                                              |                    |                                                            |
| <i>Doramectin</i>                                                                | Molecular formula: C <sub>50</sub> H <sub>74</sub> O <sub>14</sub>                                         | [M+H] <sup>+</sup> ;<br>[M+Na] <sup>+</sup> ;<br>[M+NH <sub>4</sub> ] <sup>+</sup> | 899.5151;<br>921.4971;<br>916.5417       | 331.2268;<br>593.3473;<br>67.0542            |                    |                                                            |
| CAS registration number: 117704-25-3                                             | Monoisotopic mass (Da): 898.5073                                                                           |                                                                                    |                                          |                                              |                    |                                                            |
| ChemSpider ID: 8008478                                                           | pKa (strongest acidic): 12.47                                                                              |                                                                                    |                                          |                                              |                    |                                                            |

| Group/Class - Pharmacologically active Substance                                                                            | Physicochemical properties                                                                                                                             | Monitored ion                              | Theoretical exact mass MS ( <i>m/z</i> ) | Fragment ions ( <i>m/z</i> ) MS <sup>2</sup>              |                                                            |        |
|-----------------------------------------------------------------------------------------------------------------------------|--------------------------------------------------------------------------------------------------------------------------------------------------------|--------------------------------------------|------------------------------------------|-----------------------------------------------------------|------------------------------------------------------------|--------|
|                                                                                                                             |                                                                                                                                                        |                                            |                                          | [M+H] <sup>+</sup>                                        | [M-H] <sup>-</sup>                                         | Others |
| PubChem CID:<br>9832750<br><br>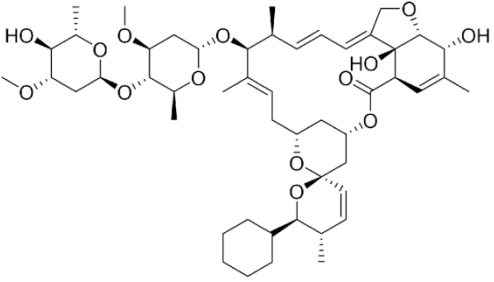             | pKa (strongest basic): -<br><br>Partition coefficient (Log P): 6.274<br><br>Intrinsic solubility (mg mL <sup>-1</sup> ): -5.467 (Low)                  |                                            |                                          |                                                           |                                                            |        |
| <i>Emamectin (Emamectin B<sub>1a</sub>)</i><br><br>CAS registration number:<br>119791-41-2<br><br>ChemSpider ID:<br>9311801 | Molecular formula:<br>C <sub>49</sub> H <sub>75</sub> NO <sub>13</sub><br><br>Monoisotopic mass (Da): 885.5233<br><br>pKa (strongest acidic):<br>12.47 | [M+H] <sup>+</sup> ;<br>[M-H] <sup>-</sup> | 886.5311;<br>884.5166                    | 158.1176;<br>82.0651;<br>67.0417;<br>126.0913;<br>91.0542 | 242.1398;<br>84.0217;<br>97.0659;<br>848.4954;<br>840.5267 |        |

| Group/Class - Pharmacologically active Substance                                                                                                       | Physicochemical properties                                                                                                                             | Monitored ion                               | Theoretical exact mass MS ( <i>m/z</i> ) | Fragment ions ( <i>m/z</i> ) MS <sup>2</sup>               |                    |                                                                                   |
|--------------------------------------------------------------------------------------------------------------------------------------------------------|--------------------------------------------------------------------------------------------------------------------------------------------------------|---------------------------------------------|------------------------------------------|------------------------------------------------------------|--------------------|-----------------------------------------------------------------------------------|
|                                                                                                                                                        |                                                                                                                                                        |                                             |                                          | [M+H] <sup>+</sup>                                         | [M-H] <sup>-</sup> | Others                                                                            |
| PubChem CID:<br>11549937<br><br>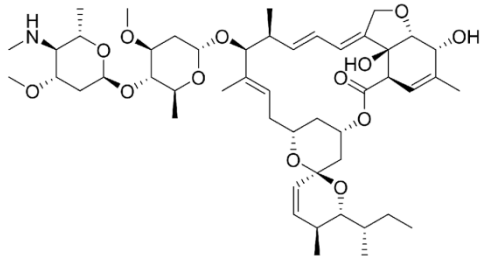                                       | pKa (strongest basic): -<br><br>Partition coefficient (Log P): 6.724<br><br>Intrinsic solubility (mg mL <sup>-1</sup> ): -0.079 (High)                 |                                             |                                          |                                                            |                    |                                                                                   |
| <i>Eprinomectin (Eprinomectin B<sub>1a</sub>)</i><br><br>CAS registration number:<br>133305-88-1<br><br>ChemSpider ID:<br>16736607<br><br>PubChem CID: | Molecular formula:<br>C <sub>50</sub> H <sub>75</sub> NO <sub>14</sub><br><br>Monoisotopic mass (Da): 913.5182<br><br>pKa (strongest acidic):<br>12.49 | [M+H] <sup>+</sup> ;<br>[M+Na] <sup>+</sup> | 914.5260;<br>936.5080                    | 186.1125;<br>112.0757;<br>154.0863;<br>68.0495;<br>67.0542 |                    | [M+Na] <sup>+</sup><br>186.1125;<br>112.0757;<br>154.0863;<br>68.0495;<br>67.0542 |

| Group/Class - Pharmacologically active Substance                                            | Physicochemical properties                                                                                                                          | Monitored ion                                                                      | Theoretical exact mass MS ( <i>m/z</i> ) | Fragment ions ( <i>m/z</i> ) MS <sup>2</sup>    |                    |                                                                                     |
|---------------------------------------------------------------------------------------------|-----------------------------------------------------------------------------------------------------------------------------------------------------|------------------------------------------------------------------------------------|------------------------------------------|-------------------------------------------------|--------------------|-------------------------------------------------------------------------------------|
|                                                                                             |                                                                                                                                                     |                                                                                    |                                          | [M+H] <sup>+</sup>                              | [M-H] <sup>-</sup> | Others                                                                              |
| 6444397<br>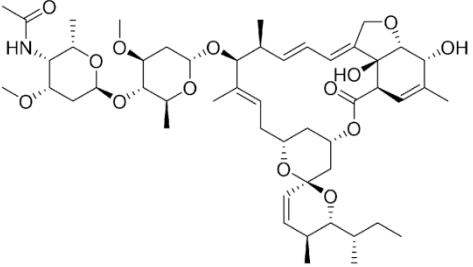 | pKa (strongest basic):<br>-1.34<br><br>Partition coefficient (Log P): 5.56<br><br>Intrinsic solubility (mg mL <sup>-1</sup> ):<br>-4.915 (Moderate) |                                                                                    |                                          |                                                 |                    |                                                                                     |
| <i>Ivermectin B<sub>1a</sub></i> /22,23-Dihydroavermectin <i>B<sub>1</sub></i>              | Molecular formula:<br>C <sub>48</sub> H <sub>74</sub> O <sub>14</sub>                                                                               | [M+H] <sup>+</sup> ;<br>[M+Na] <sup>+</sup> ;<br>[M+NH <sub>4</sub> ] <sup>+</sup> | 875.5151;<br>897.4971;<br>892.5417       | 569.3473;<br>307.2268;<br>714.4337;<br>570.3551 |                    | [M+Na] <sup>+</sup><br>713.4259;<br>569.3473;<br>307.2268;<br>714.4337;<br>570.3551 |
| CAS registration number:<br>70288-86-7                                                      | Monoisotopic mass (Da): 874.5073                                                                                                                    |                                                                                    |                                          |                                                 |                    |                                                                                     |
| ChemSpider ID:<br>7988461                                                                   | pKa (strongest acidic):<br>12.47                                                                                                                    |                                                                                    |                                          |                                                 |                    |                                                                                     |
|                                                                                             |                                                                                                                                                     |                                                                                    |                                          |                                                 |                    | [M+NH <sub>4</sub> ] <sup>+</sup>                                                   |

| Group/Class - Pharmacologically active Substance                                                                           | Physicochemical properties                                                                                                                                           | Monitored ion                              | Theoretical exact mass MS ( <i>m/z</i> ) | Fragment ions ( <i>m/z</i> ) MS <sup>2</sup>                 |                                                             |                                                            |
|----------------------------------------------------------------------------------------------------------------------------|----------------------------------------------------------------------------------------------------------------------------------------------------------------------|--------------------------------------------|------------------------------------------|--------------------------------------------------------------|-------------------------------------------------------------|------------------------------------------------------------|
|                                                                                                                            |                                                                                                                                                                      |                                            |                                          | [M+H] <sup>+</sup>                                           | [M-H] <sup>-</sup>                                          | Others                                                     |
| PubChem CID:<br>6321424<br><br>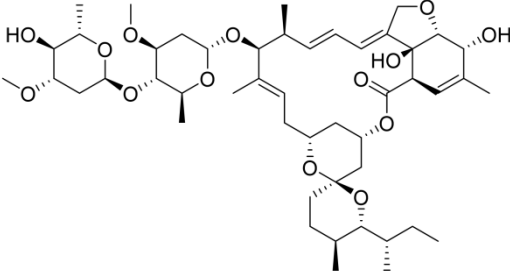            | pKa (strongest basic): -<br><br>Partition coefficient (Log P): 5.826<br><br>Intrinsic solubility (mg mL <sup>-1</sup> ): 1.957 (High)                                |                                            |                                          |                                                              |                                                             | 569.3473;<br>307.2268;<br>95.0491;<br>113.0597;<br>69.0335 |
| <i>Albendazole</i><br><br>CAS registration number:<br>54965-21-8<br><br>ChemSpider ID:<br>1998<br><br>PubChem CID:<br>2082 | Molecular formula:<br>C <sub>12</sub> H <sub>15</sub> N <sub>3</sub> O <sub>2</sub> S<br><br>Monoisotopic mass (Da): 265.0880<br><br>pKa (strongest acidic):<br>9.68 | [M+H] <sup>+</sup> ;<br>[M-H] <sup>-</sup> | 266.0958;<br>264.0812                    | 234.0692;<br>192.0224;<br>159.0427;<br>191.0148;<br>131.0478 | 189.0002;<br>232.0550;<br>159.9975;<br>161.0053;<br>81.9757 |                                                            |

| Group/Class - Pharmacologically active Substance                                 | Physicochemical properties                                                            | Monitored ion                              | Theoretical exact mass MS ( <i>m/z</i> ) | Fragment ions ( <i>m/z</i> ) MS <sup>2</sup>                 |                                                              |        |
|----------------------------------------------------------------------------------|---------------------------------------------------------------------------------------|--------------------------------------------|------------------------------------------|--------------------------------------------------------------|--------------------------------------------------------------|--------|
|                                                                                  |                                                                                       |                                            |                                          | [M+H] <sup>+</sup>                                           | [M-H] <sup>-</sup>                                           | Others |
| 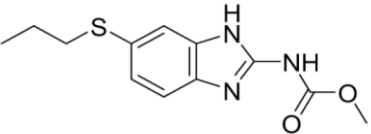 | pKa (strongest basic):<br>4.21                                                        |                                            |                                          |                                                              |                                                              |        |
|                                                                                  | Partition coefficient<br>(Log P): 3.205                                               |                                            |                                          |                                                              |                                                              |        |
|                                                                                  | Intrinsic solubility<br>(mg mL <sup>-1</sup> ): -4.382<br>(Moderate)                  |                                            |                                          |                                                              |                                                              |        |
|                                                                                  |                                                                                       |                                            |                                          |                                                              |                                                              |        |
| <i>Albendazole metabolite (Albendazole sulfone)</i>                              | Molecular formula:<br>C <sub>12</sub> H <sub>15</sub> N <sub>3</sub> O <sub>4</sub> S | [M+H] <sup>+</sup> ;<br>[M-H] <sup>-</sup> | 298.0856;<br>296.0711                    | 266.0591;<br>131.0478;<br>224.0122;<br>159.0424;<br>191.0325 | 264.0448;<br>157.0282;<br>129.0332;<br>115.0301;<br>133.0282 |        |
| CAS registration number:<br>75184-71-3                                           | Monoisotopic mass<br>(Da): 297.0778                                                   |                                            |                                          |                                                              |                                                              |        |
| ChemSpider ID:<br>48031                                                          | pKa (strongest acidic):<br>8.72                                                       |                                            |                                          |                                                              |                                                              |        |

| Group/Class - Pharmacologically active Substance                                                                                   | Physicochemical properties                                                                                                                            | Monitored ion                              | Theoretical exact mass MS ( <i>m/z</i> ) | Fragment ions ( <i>m/z</i> ) MS <sup>2</sup>                 |                                                             |        |
|------------------------------------------------------------------------------------------------------------------------------------|-------------------------------------------------------------------------------------------------------------------------------------------------------|--------------------------------------------|------------------------------------------|--------------------------------------------------------------|-------------------------------------------------------------|--------|
|                                                                                                                                    |                                                                                                                                                       |                                            |                                          | [M+H] <sup>+</sup>                                           | [M-H] <sup>-</sup>                                          | Others |
| PubChem CID:<br>53174<br><br>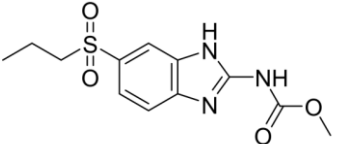                      | pKa (strongest basic):<br>2.74<br><br>Partition coefficient<br>(Log P): 1.673<br><br>Intrinsic solubility<br>(mg mL <sup>-1</sup> ): -3.437<br>(High) |                                            |                                          |                                                              |                                                             |        |
| <i>Albendazole metabolite (Albendazole sulfoxide)</i><br><br>CAS registration number:<br>54029-12-8<br><br>ChemSpider ID:<br>75767 | Molecular formula:<br>C <sub>12</sub> H <sub>15</sub> N <sub>3</sub> O <sub>3</sub> S<br><br>Monoisotopic mass<br>(Da): 281.0829                      | [M+H] <sup>+</sup> ;<br>[M-H] <sup>-</sup> | 282.0907;<br>280.0761                    | 240.0435;<br>208.0174;<br>191.0688;<br>159.0427;<br>191.0148 | 204.9951;<br>248.0499;<br>173.0231;<br>129.0332;<br>65.0145 |        |



| Group/Class - Pharmacologically active Substance                                                                   | Physicochemical properties                                                                                                                                              | Monitored ion                              | Theoretical exact mass MS ( <i>m/z</i> ) | Fragment ions ( <i>m/z</i> ) MS <sup>2</sup>                 |                                                              |        |
|--------------------------------------------------------------------------------------------------------------------|-------------------------------------------------------------------------------------------------------------------------------------------------------------------------|--------------------------------------------|------------------------------------------|--------------------------------------------------------------|--------------------------------------------------------------|--------|
|                                                                                                                    |                                                                                                                                                                         |                                            |                                          | [M+H] <sup>+</sup>                                           | [M-H] <sup>-</sup>                                           | Others |
| PubChem CID:<br>83969<br><br>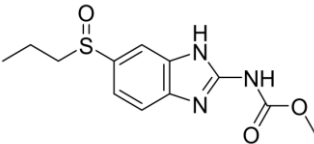      | pKa (strongest basic):<br>3.58<br><br>Partition coefficient<br>(Log P): 1.566<br><br>Intrinsic solubility<br>(mg mL <sup>-1</sup> ): -3.389<br>(High)                   |                                            |                                          |                                                              |                                                              |        |
| <i>Febantel</i><br><br>CAS registration number:<br>58306-30-2<br><br>ChemSpider ID:<br>4514715<br><br>PubChem CID: | Molecular formula:<br>C <sub>20</sub> H <sub>22</sub> N <sub>4</sub> O <sub>6</sub> S<br><br>Monoisotopic mass<br>(Da): 446.1255<br><br>pKa (strongest acidic):<br>9.48 | [M+H] <sup>+</sup> ;<br>[M-H] <sup>-</sup> | 447.1333;<br>445.1187                    | 415.1071;<br>383.0809;<br>280.0539;<br>116.0369;<br>109.0106 | 298.0643;<br>266.0393;<br>189.0001;<br>159.9975;<br>161.0053 |        |

| Group/Class - Pharmacologically active Substance                                 | Physicochemical properties                                                                                                                 | Monitored ion                              | Theoretical exact mass MS ( <i>m/z</i> ) | Fragment ions ( <i>m/z</i> ) MS <sup>2</sup>                 |                                                             |        |
|----------------------------------------------------------------------------------|--------------------------------------------------------------------------------------------------------------------------------------------|--------------------------------------------|------------------------------------------|--------------------------------------------------------------|-------------------------------------------------------------|--------|
|                                                                                  |                                                                                                                                            |                                            |                                          | [M+H] <sup>+</sup>                                           | [M-H] <sup>-</sup>                                          | Others |
| 135449328                                                                        | <p>pKa (strongest basic): -</p> <p>Partition coefficient (Log P): 3.166</p> <p>Intrinsic solubility (mg mL<sup>-1</sup>): -4.682 (Low)</p> |                                            |                                          |                                                              |                                                             |        |
| 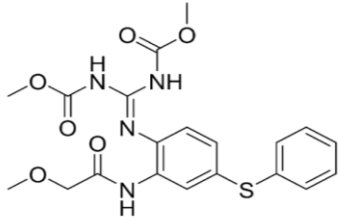 |                                                                                                                                            |                                            |                                          |                                                              |                                                             |        |
| <i>Fenbendazole</i>                                                              | Molecular formula:<br>C <sub>15</sub> H <sub>13</sub> N <sub>3</sub> O <sub>2</sub> S                                                      | [M+H] <sup>+</sup> ;<br>[M-H] <sup>-</sup> | 300.0801;<br>298.0656                    | 268.0536;<br>190.0068;<br>159.0426;<br>109.0106;<br>131.0478 | 266.0394;<br>189.0002;<br>159.9975;<br>161.0053;<br>81.9757 |        |
| CAS registration number:<br>43210-67-9                                           | Monoisotopic mass (Da): 299.0723                                                                                                           |                                            |                                          |                                                              |                                                             |        |
| ChemSpider ID:<br>3217                                                           | pKa (strongest acidic):<br>9.59                                                                                                            |                                            |                                          |                                                              |                                                             |        |
| PubChem CID:                                                                     |                                                                                                                                            |                                            |                                          |                                                              |                                                             |        |

| Group/Class - Pharmacologically active Substance                                             | Physicochemical properties                                                                                                                  | Monitored ion                           | Theoretical exact mass MS ( <i>m/z</i> ) | Fragment ions ( <i>m/z</i> ) MS <sup>2</sup>    |                                                  |        |
|----------------------------------------------------------------------------------------------|---------------------------------------------------------------------------------------------------------------------------------------------|-----------------------------------------|------------------------------------------|-------------------------------------------------|--------------------------------------------------|--------|
|                                                                                              |                                                                                                                                             |                                         |                                          | [M+H] <sup>+</sup>                              | [M-H] <sup>-</sup>                               | Others |
| 3334<br><br>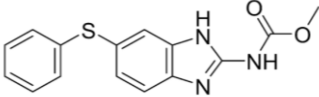 | <p>pKa (strongest basic): 4.06</p> <p>Partition coefficient (Log P): 3.99</p> <p>Intrinsic solubility (mg mL<sup>-1</sup>): -5.36 (Low)</p> |                                         |                                          |                                                 |                                                  |        |
| <i>Fenbendazole metabolite (Fenbendazole sulfone)</i>                                        | Molecular formula: C <sub>15</sub> H <sub>13</sub> N <sub>3</sub> O <sub>4</sub> S                                                          | [M+H] <sup>+</sup> ; [M-H] <sup>-</sup> | 332.0700; 330.0554                       | 300.0437; 159.0427; 131.0478; 104.0369; 77.0260 | 298.0292; 160.0152; 129.0332; 115.0301; 106.0173 |        |
| CAS registration number: 54029-20-8                                                          | Monoisotopic mass (Da): 331.0621                                                                                                            |                                         |                                          |                                                 |                                                  |        |
| ChemSpider ID: 142389                                                                        | pKa (strongest acidic): 8.79                                                                                                                |                                         |                                          |                                                 |                                                  |        |
| PubChem CID:                                                                                 |                                                                                                                                             |                                         |                                          |                                                 |                                                  |        |

| Group/Class - Pharmacologically active Substance                                                                     | Physicochemical properties                                                                                                                                                         | Monitored ion      | Theoretical exact mass MS ( <i>m/z</i> ) | Fragment ions ( <i>m/z</i> ) MS <sup>2</sup>               |                    |        |
|----------------------------------------------------------------------------------------------------------------------|------------------------------------------------------------------------------------------------------------------------------------------------------------------------------------|--------------------|------------------------------------------|------------------------------------------------------------|--------------------|--------|
|                                                                                                                      |                                                                                                                                                                                    |                    |                                          | [M+H] <sup>+</sup>                                         | [M-H] <sup>-</sup> | Others |
| 162136<br>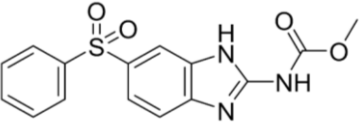                           | pK <sub>a</sub> (strongest basic):<br>2.82<br><br>Partition coefficient<br>(Log P): 2.756<br><br>Intrinsic solubility<br>(mg mL <sup>-1</sup> ): -4.397<br>(Moderate)              |                    |                                          |                                                            |                    |        |
| <i>Flubendazole</i><br><br>CAS registration number:<br>31430-15-6<br><br>ChemSpider ID:<br>32932<br><br>PubChem CID: | Molecular formula:<br>C <sub>16</sub> H <sub>12</sub> FN <sub>3</sub> O <sub>3</sub><br><br>Monoisotopic mass<br>(Da): 313.0857<br><br>pK <sub>a</sub> (strongest acidic):<br>9.17 | [M+H] <sup>+</sup> | 314.0936                                 | 74.0150;<br>282.0673;<br>123.0241;<br>123.0353;<br>75.0229 |                    |        |

| Group/Class - Pharmacologically active Substance                                              | Physicochemical properties                                                                                                                           | Monitored ion      | Theoretical exact mass MS ( <i>m/z</i> ) | Fragment ions ( <i>m/z</i> ) MS <sup>2</sup> |                    |        |
|-----------------------------------------------------------------------------------------------|------------------------------------------------------------------------------------------------------------------------------------------------------|--------------------|------------------------------------------|----------------------------------------------|--------------------|--------|
|                                                                                               |                                                                                                                                                      |                    |                                          | [M+H] <sup>+</sup>                           | [M-H] <sup>-</sup> | Others |
| 35802<br><br>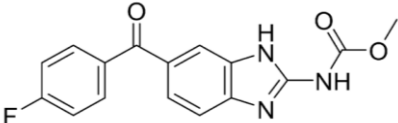 | pKa (strongest basic):<br>3.42<br><br>Partition coefficient<br>(Log P): 3.403<br><br>Intrinsic solubility<br>(mg mL <sup>-1</sup> ): -5.207<br>(Low) |                    |                                          |                                              |                    |        |
| <i>Flubendazole metabolite (2-Aminoflubendazole)</i>                                          | Molecular formula:<br>C <sub>14</sub> H <sub>10</sub> FN <sub>3</sub> O                                                                              | [M+H] <sup>+</sup> | 256.0881                                 | 256.0881;<br>123.0241;<br>113.0396;          |                    |        |
| CAS registration number:<br>82050-13-3                                                        | Monoisotopic mass<br>(Da): 255.0802                                                                                                                  |                    |                                          | 123.0353;<br>75.0229                         |                    |        |
| ChemSpider ID:<br>22797878                                                                    | pKa (strongest acidic):<br>12.01                                                                                                                     |                    |                                          |                                              |                    |        |

| Group/Class - Pharmacologically active Substance                                                                   | Physicochemical properties                                                                                                                                            | Monitored ion                              | Theoretical exact mass MS ( <i>m/z</i> ) | Fragment ions ( <i>m/z</i> ) MS <sup>2</sup>                |                                                              |        |
|--------------------------------------------------------------------------------------------------------------------|-----------------------------------------------------------------------------------------------------------------------------------------------------------------------|--------------------------------------------|------------------------------------------|-------------------------------------------------------------|--------------------------------------------------------------|--------|
|                                                                                                                    |                                                                                                                                                                       |                                            |                                          | [M+H] <sup>+</sup>                                          | [M-H] <sup>-</sup>                                           | Others |
| PubChem CID:<br>57358774<br><br>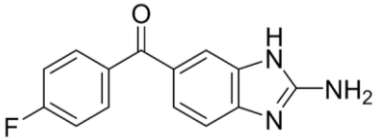   | pKa (strongest basic):<br>6.35<br><br>Partition coefficient<br>(Log P): 2.717<br><br>Intrinsic solubility<br>(mg mL <sup>-1</sup> ): -4.857<br>(Low)                  |                                            |                                          |                                                             |                                                              |        |
| <i>Mebendazole</i><br><br>CAS registration number:<br>31431-39-7<br><br>ChemSpider ID:<br>3890<br><br>PubChem CID: | Molecular formula:<br>C <sub>16</sub> H <sub>13</sub> N <sub>3</sub> O <sub>3</sub><br><br>Monoisotopic mass<br>(Da): 295.0951<br><br>pKa (strongest acidic):<br>9.17 | [M+H] <sup>+</sup> ;<br>[M-H] <sup>-</sup> | 296.1030;<br>294.0884                    | 264.0768;<br>130.0400;<br>104.0369;<br>95.0491;<br>105.0447 | 262.0622;<br>129.0332;<br>115.0302;<br>160.0152;<br>106.0173 |        |

| Group/Class - Pharmacologically active Substance                                                              | Physicochemical properties                                                                                                                                 | Monitored ion      | Theoretical exact mass MS ( <i>m/z</i> ) | Fragment ions ( <i>m/z</i> ) MS <sup>2</sup>               |                    |        |
|---------------------------------------------------------------------------------------------------------------|------------------------------------------------------------------------------------------------------------------------------------------------------------|--------------------|------------------------------------------|------------------------------------------------------------|--------------------|--------|
|                                                                                                               |                                                                                                                                                            |                    |                                          | [M+H] <sup>+</sup>                                         | [M-H] <sup>-</sup> | Others |
| 4030<br>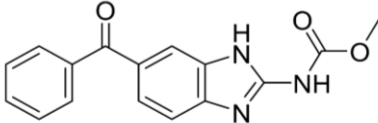                      | <p>pKa (strongest basic): 3.42</p> <p>Partition coefficient (Log P): 3.26</p> <p>Intrinsic solubility (mg mL<sup>-1</sup>): -4.937 (Low)</p>               |                    |                                          |                                                            |                    |        |
| <i>Oxibendazole</i><br><br>CAS registration number: 20559-55-1<br><br>ChemSpider ID: 4461<br><br>PubChem CID: | <p>Molecular formula: C<sub>12</sub>H<sub>15</sub>N<sub>3</sub>O<sub>3</sub></p> <p>Monoisotopic mass (Da): 249.1108</p> <p>pKa (strongest acidic): 10</p> | [M+H] <sup>+</sup> | 250.1186                                 | 218.0924;<br>176.0455;<br>148.0505;<br>81.0335;<br>80.0495 |                    |        |

| Group/Class - Pharmacologically active Substance                                         | Physicochemical properties                                                                                                                                        | Monitored ion                              | Theoretical exact mass MS ( <i>m/z</i> ) | Fragment ions ( <i>m/z</i> ) MS <sup>2</sup>                 |                                                 |        |
|------------------------------------------------------------------------------------------|-------------------------------------------------------------------------------------------------------------------------------------------------------------------|--------------------------------------------|------------------------------------------|--------------------------------------------------------------|-------------------------------------------------|--------|
|                                                                                          |                                                                                                                                                                   |                                            |                                          | [M+H] <sup>+</sup>                                           | [M-H] <sup>-</sup>                              | Others |
| 4622<br>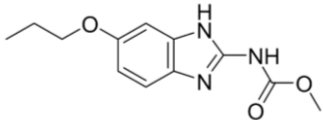 | pK <sub>a</sub> (strongest basic):<br>4.73<br><br>Partition coefficient<br>(Log P): 2.522<br><br>Intrinsic solubility<br>(mg mL <sup>-1</sup> ): -3.412<br>(High) |                                            |                                          |                                                              |                                                 |        |
| <i>Oxendazole</i>                                                                        | Molecular formula:<br>C <sub>15</sub> H <sub>13</sub> N <sub>3</sub> O <sub>3</sub> S                                                                             | [M+H] <sup>+</sup> ;<br>[M-H] <sup>-</sup> | 316.0750;<br>314.0605                    | 284.0488;<br>191.0689;<br>223.0576;<br>299.0723;<br>159.0427 | 282.0332;<br>204.9954;<br>237.0203;<br>173.0233 |        |
| CAS registration number:<br>53716-50-0                                                   | Monoisotopic mass<br>(Da): 315.0672                                                                                                                               |                                            |                                          |                                                              |                                                 |        |
| ChemSpider ID:<br>37316                                                                  | pK <sub>a</sub> (strongest acidic):<br>9.26                                                                                                                       |                                            |                                          |                                                              |                                                 |        |
| PubChem CID:                                                                             |                                                                                                                                                                   |                                            |                                          |                                                              |                                                 |        |



| Group/Class - Pharmacologically active Substance                                                                   | Physicochemical properties                                                                                                                                | Monitored ion      | Theoretical exact mass MS ( <i>m/z</i> ) | Fragment ions ( <i>m/z</i> ) MS <sup>2</sup>               |                    |        |
|--------------------------------------------------------------------------------------------------------------------|-----------------------------------------------------------------------------------------------------------------------------------------------------------|--------------------|------------------------------------------|------------------------------------------------------------|--------------------|--------|
|                                                                                                                    |                                                                                                                                                           |                    |                                          | [M+H] <sup>+</sup>                                         | [M-H] <sup>-</sup> | Others |
| 40854<br><br>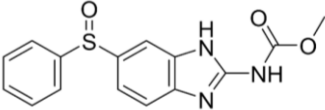                      | pKa (strongest basic):<br>3.57<br><br>Partition coefficient<br>(Log P): 2.615<br><br>Intrinsic solubility<br>(mg mL <sup>-1</sup> ): -4.359<br>(Moderate) |                    |                                          |                                                            |                    |        |
| <i>Thiabendazole</i><br><br>CAS registration number:<br>148-79-8<br><br>ChemSpider ID:<br>5237<br><br>PubChem CID: | Molecular formula:<br>C <sub>10</sub> H <sub>7</sub> N <sub>3</sub> S<br><br>Monoisotopic mass<br>(Da): 201.0355<br><br>pKa (strongest acidic):<br>10.28  | [M+H] <sup>+</sup> | 202.0433                                 | 175.0324;<br>131.0604;<br>65.0386;<br>92.0495;<br>104.0495 |                    |        |

| Group/Class - Pharmacologically active Substance                                                                        | Physicochemical properties                                                                                                                                                 | Monitored ion                                   | Theoretical exact mass MS ( <i>m/z</i> ) | Fragment ions ( <i>m/z</i> ) MS <sup>2</sup>                            |                                                                        |        |
|-------------------------------------------------------------------------------------------------------------------------|----------------------------------------------------------------------------------------------------------------------------------------------------------------------------|-------------------------------------------------|------------------------------------------|-------------------------------------------------------------------------|------------------------------------------------------------------------|--------|
|                                                                                                                         |                                                                                                                                                                            |                                                 |                                          | [M+H] <sup>+</sup>                                                      | [M-H] <sup>-</sup>                                                     | Others |
| 5430<br>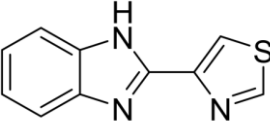                                | <p>pK<sub>a</sub> (strongest basic): 4.08</p> <p>Partition coefficient (Log P): 2.329</p> <p>Intrinsic solubility (mg mL<sup>-1</sup>): -3.097 (High)</p>                  |                                                 |                                          |                                                                         |                                                                        |        |
| <i>Triclabendazole</i><br><br>CAS registration number: 68786-66-3<br><br>ChemSpider ID: 45565<br><br>PubChem CID: 50248 | <p>Molecular formula: C<sub>14</sub>H<sub>9</sub>Cl<sub>3</sub>N<sub>2</sub>OS</p> <p>Monoisotopic mass (Da): 357.9496</p> <p>pK<sub>a</sub> (strongest acidic): 10.46</p> | <p>[M+H]<sup>+</sup>;<br/>[M-H]<sup>-</sup></p> | <p>358.9574;<br/>356.9428</p>            | <p>343.9339;<br/>273.9962;<br/>198.9727;<br/>170.9779;<br/>242.0241</p> | <p>196.9582;<br/>65.9986;<br/>341.9194;<br/>211.9817;<br/>152.9861</p> |        |

| Group/Class - Pharmacologically active Substance                                 | Physicochemical properties                                                                         | Monitored ion      | Theoretical exact mass MS ( <i>m/z</i> ) | Fragment ions ( <i>m/z</i> ) MS <sup>2</sup> |                                                              |        |
|----------------------------------------------------------------------------------|----------------------------------------------------------------------------------------------------|--------------------|------------------------------------------|----------------------------------------------|--------------------------------------------------------------|--------|
|                                                                                  |                                                                                                    |                    |                                          | [M+H] <sup>+</sup>                           | [M-H] <sup>-</sup>                                           | Others |
| 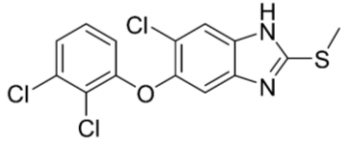 | pK <sub>a</sub> (strongest basic): 4.54                                                            |                    |                                          |                                              |                                                              |        |
|                                                                                  | Partition coefficient (Log P): 5.884                                                               |                    |                                          |                                              |                                                              |        |
|                                                                                  | Intrinsic solubility (mg mL <sup>-1</sup> ): -7.325 (Low)                                          |                    |                                          |                                              |                                                              |        |
|                                                                                  |                                                                                                    |                    |                                          |                                              |                                                              |        |
| <i>Fipronil</i>                                                                  | Molecular formula: C <sub>12</sub> H <sub>4</sub> Cl <sub>2</sub> F <sub>6</sub> N <sub>4</sub> OS | [M-H] <sup>-</sup> | 434.9314                                 |                                              | 329.9596;<br>349.9585;<br>183.0176;<br>163.0113;<br>143.0051 |        |
| CAS registration number: 120068-37-3                                             | Monoisotopic mass (Da): 435.9382                                                                   |                    |                                          |                                              |                                                              |        |
| ChemSpider ID: 3235                                                              | pK <sub>a</sub> (strongest acidic): -                                                              |                    |                                          |                                              |                                                              |        |
| PubChem CID:                                                                     |                                                                                                    |                    |                                          |                                              |                                                              |        |

| Group/Class - Pharmacologically active Substance                                                                        | Physicochemical properties                                                                                                                                                           | Monitored ion      | Theoretical exact mass MS ( <i>m/z</i> ) | Fragment ions ( <i>m/z</i> ) MS <sup>2</sup> |                                                              |        |
|-------------------------------------------------------------------------------------------------------------------------|--------------------------------------------------------------------------------------------------------------------------------------------------------------------------------------|--------------------|------------------------------------------|----------------------------------------------|--------------------------------------------------------------|--------|
|                                                                                                                         |                                                                                                                                                                                      |                    |                                          | [M+H] <sup>+</sup>                           | [M-H] <sup>-</sup>                                           | Others |
| 3352<br><br>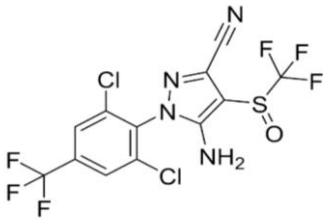                            | <p>pKa (strongest basic): 0.18</p> <p>Partition coefficient (Log P): 4.489</p> <p>Intrinsic solubility (mg mL<sup>-1</sup>): -5.959 (Low)</p>                                        |                    |                                          |                                              |                                                              |        |
| <i>Fipronil metabolite (Fipronil sulfone)</i><br><br>CAS registration number: 120068-36-2<br><br>ChemSpider ID: 2336427 | <p>Molecular formula: C<sub>12</sub>H<sub>4</sub>Cl<sub>2</sub>F<sub>6</sub>N<sub>4</sub>O<sub>2</sub>S</p> <p>Monoisotopic mass (Da): 451.9331</p> <p>pKa (strongest acidic): -</p> | [M-H] <sup>-</sup> | 450.9263                                 |                                              | 414.9497;<br>281.9923;<br>243.9894;<br>218.0097;<br>148.0077 |        |

| Group/Class - Pharmacologically active Substance                                                                | Physicochemical properties                                                                                                                            | Monitored ion      | Theoretical exact mass MS ( <i>m/z</i> ) | Fragment ions ( <i>m/z</i> ) MS <sup>2</sup>                |                    |        |
|-----------------------------------------------------------------------------------------------------------------|-------------------------------------------------------------------------------------------------------------------------------------------------------|--------------------|------------------------------------------|-------------------------------------------------------------|--------------------|--------|
|                                                                                                                 |                                                                                                                                                       |                    |                                          | [M+H] <sup>+</sup>                                          | [M-H] <sup>-</sup> | Others |
| PubChem CID:<br>3078139<br><br>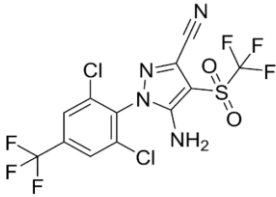 | pKa (strongest basic):<br>-0.45<br><br>Partition coefficient<br>(Log P): 4.596<br><br>Intrinsic solubility<br>(mg mL <sup>-1</sup> ): -5.967<br>(Low) |                    |                                          |                                                             |                    |        |
| <i>Levamisole</i><br><br>CAS registration number:<br>14769-73-4<br><br>ChemSpider ID:<br>25037                  | Molecular formula:<br>C <sub>11</sub> H <sub>12</sub> N <sub>2</sub> S<br><br>Monoisotopic mass<br>(Da): 204.0716<br><br>pKa (strongest acidic): -    | [M+H] <sup>+</sup> | 205.0794                                 | 178.0685;<br>91.0542;<br>123.0263;<br>118.0651;<br>117.0699 |                    |        |

| Group/Class - Pharmacologically active Substance                                 | Physicochemical properties                                            | Monitored ion                                                       | Theoretical exact mass MS ( <i>m/z</i> ) | Fragment ions ( <i>m/z</i> ) MS <sup>2</sup> |                    |        |
|----------------------------------------------------------------------------------|-----------------------------------------------------------------------|---------------------------------------------------------------------|------------------------------------------|----------------------------------------------|--------------------|--------|
|                                                                                  |                                                                       |                                                                     |                                          | [M+H] <sup>+</sup>                           | [M-H] <sup>-</sup> | Others |
| PubChem CID:<br>26879                                                            | pKa (strongest basic):<br>11.58                                       |                                                                     |                                          |                                              |                    |        |
| 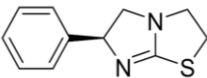 | Partition coefficient (Log P): 2.358                                  |                                                                     |                                          |                                              |                    |        |
|                                                                                  | Intrinsic solubility (mg mL <sup>-1</sup> ): -3.223 (High)            |                                                                     |                                          |                                              |                    |        |
| <i>Moxidectin</i>                                                                | Molecular formula:<br>C <sub>37</sub> H <sub>53</sub> NO <sub>8</sub> | [M+H] <sup>+</sup> ;<br>[M-H] <sup>-</sup> ;<br>[M+Na] <sup>+</sup> | 640.3844;<br>638.3698;<br>662.3663       | 91.0542;<br>528.2956;<br>98.0600;            | 528.2956           |        |
| CAS registration number:<br>113507-06-5                                          | Monoisotopic mass (Da): 639.3766                                      |                                                                     |                                          | 199.1117;<br>498.2847                        |                    |        |
| ChemSpider ID:<br>22901017                                                       | pKa (strongest acidic):<br>12.55                                      |                                                                     |                                          |                                              |                    |        |

| Group/Class - Pharmacologically active Substance                                                                 | Physicochemical properties                                                                                                                                    | Monitored ion      | Theoretical exact mass MS ( <i>m/z</i> ) | Fragment ions ( <i>m/z</i> ) MS <sup>2</sup>             |                    |        |
|------------------------------------------------------------------------------------------------------------------|---------------------------------------------------------------------------------------------------------------------------------------------------------------|--------------------|------------------------------------------|----------------------------------------------------------|--------------------|--------|
|                                                                                                                  |                                                                                                                                                               |                    |                                          | [M+H] <sup>+</sup>                                       | [M-H] <sup>-</sup> | Others |
| PubChem CID:<br>16760141<br><br>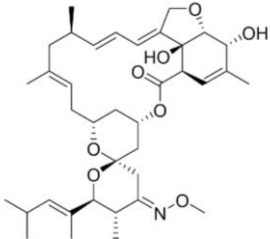 | pKa (strongest basic):<br>2.01<br><br>Partition coefficient<br>(Log P): 5.67<br><br>Intrinsic solubility<br>(mg mL <sup>-1</sup> ): -6.539<br>(Low)           |                    |                                          |                                                          |                    |        |
| <i>Dimetridazole</i><br><br>CAS registration number:<br>551-92-8<br><br>ChemSpider ID:<br>2980                   | Molecular formula:<br>C <sub>5</sub> H <sub>7</sub> N <sub>3</sub> O <sub>2</sub><br><br>Monoisotopic mass<br>(Da): 141.0533<br><br>pKa (strongest acidic): - | [M+H] <sup>+</sup> | 142.0611                                 | 112.0631;<br>95.0604;<br>81.0447;<br>97.0396;<br>96.0682 |                    |        |

| Group/Class - Pharmacologically active Substance                                                             | Physicochemical properties                                                                                                                           | Monitored ion      | Theoretical exact mass MS ( <i>m/z</i> ) | Fragment ions ( <i>m/z</i> ) MS <sup>2</sup>             |                    |        |
|--------------------------------------------------------------------------------------------------------------|------------------------------------------------------------------------------------------------------------------------------------------------------|--------------------|------------------------------------------|----------------------------------------------------------|--------------------|--------|
|                                                                                                              |                                                                                                                                                      |                    |                                          | [M+H] <sup>+</sup>                                       | [M-H] <sup>-</sup> | Others |
| PubChem CID:<br>3090<br><br>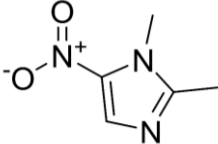 | pKa (strongest basic):<br>2.9<br><br>Partition coefficient<br>(Log P): 0.231<br><br>Intrinsic solubility<br>(mg mL <sup>-1</sup> ): -0.286<br>(High) |                    |                                          |                                                          |                    |        |
| <i>Dimetridazole metabolite</i><br>( <i>Hydroxydimetridazole/HMMNI</i> )                                     | Molecular formula:<br>C <sub>5</sub> H <sub>7</sub> N <sub>3</sub> O <sub>3</sub>                                                                    | [M+H] <sup>+</sup> | 158.0560                                 | 140.0455;<br>66.0338;<br>69.0447;<br>67.0417;<br>94.0525 |                    |        |
| CAS registration number:<br>936-05-0                                                                         | Monoisotopic mass<br>(Da): 157.0482                                                                                                                  |                    |                                          |                                                          |                    |        |
| ChemSpider ID:                                                                                               | pKa (strongest acidic):<br>13.8                                                                                                                      |                    |                                          |                                                          |                    |        |



| Group/Class - Pharmacologically active Substance                                                                          | Physicochemical properties                                                                                                                                           | Monitored ion      | Theoretical exact mass MS ( <i>m/z</i> ) | Fragment ions ( <i>m/z</i> ) MS <sup>2</sup>               |                    |        |
|---------------------------------------------------------------------------------------------------------------------------|----------------------------------------------------------------------------------------------------------------------------------------------------------------------|--------------------|------------------------------------------|------------------------------------------------------------|--------------------|--------|
|                                                                                                                           |                                                                                                                                                                      |                    |                                          | [M+H] <sup>+</sup>                                         | [M-H] <sup>-</sup> | Others |
| 484517<br><br>PubChem CID: 557356<br><br>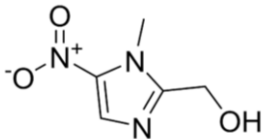 | pK <sub>a</sub> (strongest basic): 1.36<br><br>Partition coefficient (Log P): -0.586<br><br>Intrinsic solubility (mg mL <sup>-1</sup> ): 0.103 (High)                |                    |                                          |                                                            |                    |        |
| <i>Iprnidazole</i><br><br>CAS registration number: 14885-29-1<br><br>ChemSpider ID: 25097<br><br>PubChem CID:             | Molecular formula: C <sub>7</sub> H <sub>11</sub> N <sub>3</sub> O <sub>2</sub><br><br>Monoisotopic mass (Da): 169.0846<br><br>pK <sub>a</sub> (strongest acidic): - | [M+H] <sup>+</sup> | 170.0924                                 | 109.0760;<br>84.0808;<br>124.0995;<br>96.0682;<br>125.0709 |                    |        |

| Group/Class - Pharmacologically active Substance                                              | Physicochemical properties                                                                                                                            | Monitored ion      | Theoretical exact mass MS ( <i>m/z</i> ) | Fragment ions ( <i>m/z</i> ) MS <sup>2</sup> |                    |        |
|-----------------------------------------------------------------------------------------------|-------------------------------------------------------------------------------------------------------------------------------------------------------|--------------------|------------------------------------------|----------------------------------------------|--------------------|--------|
|                                                                                               |                                                                                                                                                       |                    |                                          | [M+H] <sup>+</sup>                           | [M-H] <sup>-</sup> | Others |
| 26951<br><br>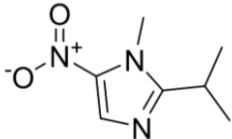 | pKa (strongest basic):<br>2.66<br><br>Partition coefficient<br>(Log P): 1.474<br><br>Intrinsic solubility<br>(mg mL <sup>-1</sup> ): -1.173<br>(High) |                    |                                          |                                              |                    |        |
| <i>Ipronidazole metabolite (Hydroxy Ipronidazole)</i>                                         | Molecular formula:<br>C <sub>7</sub> H <sub>11</sub> N <sub>3</sub> O <sub>3</sub>                                                                    | [M+H] <sup>+</sup> | 186.0873                                 | 168.0767;<br>82.0651;<br>186.0873;           |                    |        |
| CAS registration number:<br>35175-14-5                                                        | Monoisotopic mass<br>(Da): 185.0795                                                                                                                   |                    |                                          | 121.0760;<br>138.0788                        |                    |        |
| ChemSpider ID:<br>520172                                                                      | pKa (strongest acidic):<br>13.54                                                                                                                      |                    |                                          |                                              |                    |        |

| Group/Class - Pharmacologically active Substance                                                               | Physicochemical properties                                                                                                                                                       | Monitored ion      | Theoretical exact mass MS ( <i>m/z</i> ) | Fragment ions ( <i>m/z</i> ) MS <sup>2</sup>              |                    |        |
|----------------------------------------------------------------------------------------------------------------|----------------------------------------------------------------------------------------------------------------------------------------------------------------------------------|--------------------|------------------------------------------|-----------------------------------------------------------|--------------------|--------|
|                                                                                                                |                                                                                                                                                                                  |                    |                                          | [M+H] <sup>+</sup>                                        | [M-H] <sup>-</sup> | Others |
| PubChem CID:<br>598402<br><br>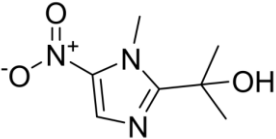 | pK <sub>a</sub> (strongest basic):<br>1.4<br><br>Partition coefficient<br>(Log P): 0.415<br><br>Intrinsic solubility<br>(mg mL <sup>-1</sup> ): -0.751<br>(High)                 |                    |                                          |                                                           |                    |        |
| <i>Metronidazole</i><br><br>CAS registration number:<br>443-48-1<br><br>ChemSpider ID:<br>4029                 | Molecular formula:<br>C <sub>6</sub> H <sub>9</sub> N <sub>3</sub> O <sub>3</sub><br><br>Monoisotopic mass<br>(Da): 171.0638<br><br>pK <sub>a</sub> (strongest acidic):<br>15.42 | [M+H] <sup>+</sup> | 172.0717                                 | 128.0455;<br>82.0525;<br>81.0447;<br>111.0427;<br>98.0475 |                    |        |

| Group/Class - Pharmacologically active Substance                                                             | Physicochemical properties                                                                                                                         | Monitored ion      | Theoretical exact mass MS ( <i>m/z</i> ) | Fragment ions ( <i>m/z</i> ) MS <sup>2</sup> |                    |        |
|--------------------------------------------------------------------------------------------------------------|----------------------------------------------------------------------------------------------------------------------------------------------------|--------------------|------------------------------------------|----------------------------------------------|--------------------|--------|
|                                                                                                              |                                                                                                                                                    |                    |                                          | [M+H] <sup>+</sup>                           | [M-H] <sup>-</sup> | Others |
| PubChem CID:<br>4173<br><br>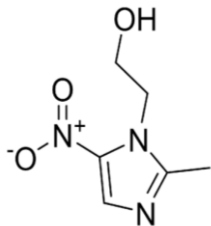 | pKa (strongest basic):<br>2.81<br><br>Partition coefficient<br>(Log P): -0.459<br><br>Intrinsic solubility<br>(mg mL <sup>-1</sup> ): -0.16 (High) |                    |                                          |                                              |                    |        |
| <i>Metronidazole metabolite</i><br>( <i>Hydroxymetronidazole</i> )                                           | Molecular formula:<br>C <sub>6</sub> H <sub>9</sub> N <sub>3</sub> O <sub>4</sub>                                                                  | [M+H] <sup>+</sup> | 188.0666                                 | 144.0405;<br>126.0298;<br>123.0554;          |                    |        |
| CAS registration number:<br>4812-40-2                                                                        | Monoisotopic mass<br>(Da): 187.0588                                                                                                                |                    |                                          | 68.0495;<br>80.0369                          |                    |        |
| ChemSpider ID:<br>108713                                                                                     | pKa (strongest acidic):<br>13.77                                                                                                                   |                    |                                          |                                              |                    |        |

| Group/Class - Pharmacologically active Substance                                 | Physicochemical properties                                                        | Monitored ion                               | Theoretical exact mass MS ( <i>m/z</i> ) | Fragment ions ( <i>m/z</i> ) MS <sup>2</sup> |                    |                                                           |
|----------------------------------------------------------------------------------|-----------------------------------------------------------------------------------|---------------------------------------------|------------------------------------------|----------------------------------------------|--------------------|-----------------------------------------------------------|
|                                                                                  |                                                                                   |                                             |                                          | [M+H] <sup>+</sup>                           | [M-H] <sup>-</sup> | Others                                                    |
| PubChem CID:<br>121858                                                           | pKa (strongest basic):<br>1.27                                                    |                                             |                                          |                                              |                    |                                                           |
| 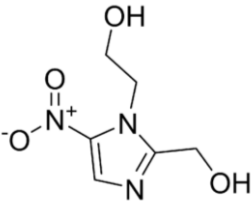 | Partition coefficient<br>(Log P): -1.277                                          |                                             |                                          |                                              |                    |                                                           |
|                                                                                  | Intrinsic solubility<br>(mg mL <sup>-1</sup> ): 0.237 (High)                      |                                             |                                          |                                              |                    |                                                           |
|                                                                                  |                                                                                   |                                             |                                          |                                              |                    |                                                           |
| <i>Ronidazole/1-Methyl-2-carbamoyloxymethyl-5-nitroimidazole</i>                 | Molecular formula:<br>C <sub>6</sub> H <sub>8</sub> N <sub>4</sub> O <sub>4</sub> | [M+H] <sup>+</sup> ;<br>[M+Na] <sup>+</sup> | 201.0618;<br>223.0438                    | 140.0455;<br>67.0417;<br>66.0338;            |                    | [M+Na] <sup>+</sup><br>199.9941;<br>144.9883;<br>162.9988 |
| CAS registration number:<br>7681-76-7                                            | Monoisotopic mass<br>(Da): 200.0540                                               |                                             |                                          | 110.0475;<br>94.0525                         |                    |                                                           |
| ChemSpider ID:<br>4915                                                           | pKa (strongest acidic):<br>13.97                                                  |                                             |                                          |                                              |                    |                                                           |

| Group/Class - Pharmacologically active Substance                                                                   | Physicochemical properties                                                                                                                                                                                           | Monitored ion      | Theoretical exact mass MS ( <i>m/z</i> ) | Fragment ions ( <i>m/z</i> ) MS <sup>2</sup>                |                    |        |
|--------------------------------------------------------------------------------------------------------------------|----------------------------------------------------------------------------------------------------------------------------------------------------------------------------------------------------------------------|--------------------|------------------------------------------|-------------------------------------------------------------|--------------------|--------|
|                                                                                                                    |                                                                                                                                                                                                                      |                    |                                          | [M+H] <sup>+</sup>                                          | [M-H] <sup>-</sup> | Others |
| PubChem CID: 5094<br><br>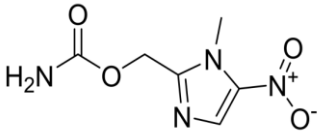          | pK <sub>a</sub> (strongest basic): 1.34<br><br>Partition coefficient (Log P): -0.479<br><br>Intrinsic solubility (mg mL <sup>-1</sup> ): -0.46 (High)                                                                |                    |                                          |                                                             |                    |        |
| <i>Praziquantel</i><br><br>CAS registration number: 55268-74-1<br><br>ChemSpider ID: 4722<br><br>PubChem CID: 4891 | Molecular formula: C <sub>19</sub> H <sub>24</sub> N <sub>2</sub> O <sub>2</sub><br><br>Monoisotopic mass (Da): 312.1832<br><br>pK <sub>a</sub> (strongest acidic): -<br><br>pK <sub>a</sub> (strongest basic): -0.6 | [M+H] <sup>+</sup> | 313.1911                                 | 203.1179;<br>174.0913;<br>132.0808;<br>129.0699;<br>83.0855 |                    |        |

| Group/Class - Pharmacologically active Substance                                 | Physicochemical properties                                                                                         | Monitored ion                              | Theoretical exact mass MS ( <i>m/z</i> ) | Fragment ions ( <i>m/z</i> ) MS <sup>2</sup> |                                     |        |
|----------------------------------------------------------------------------------|--------------------------------------------------------------------------------------------------------------------|--------------------------------------------|------------------------------------------|----------------------------------------------|-------------------------------------|--------|
|                                                                                  |                                                                                                                    |                                            |                                          | [M+H] <sup>+</sup>                           | [M-H] <sup>-</sup>                  | Others |
| 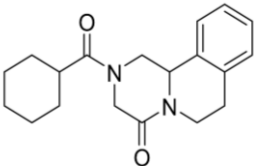 | Partition coefficient<br>(Log P): 2.302                                                                            |                                            |                                          |                                              |                                     |        |
|                                                                                  | Intrinsic solubility<br>(mg mL <sup>-1</sup> ):<br>-4.586 (Low)                                                    |                                            |                                          |                                              |                                     |        |
| <i>Closantel</i>                                                                 | Molecular formula:<br>C <sub>22</sub> H <sub>14</sub> Cl <sub>2</sub> I <sub>2</sub> N <sub>2</sub> O <sub>2</sub> | [M+H] <sup>+</sup> ;<br>[M-H] <sup>-</sup> | 662.8595;<br>660.8449                    | 264.0339;<br>194.0964;<br>635.8485;          | 126.9050;<br>344.8279;<br>532.9315; |        |
| CAS registration number:<br>57808-65-8                                           | Monoisotopic mass<br>(Da): 661.8516                                                                                |                                            |                                          | 214.0418;<br>534.8094                        | 315.0086;<br>279.0320               |        |
| ChemSpider ID:<br>38827                                                          | pKa (strongest acidic):<br>6.41                                                                                    |                                            |                                          |                                              |                                     |        |
| PubChem CID:<br>42574                                                            | pKa (strongest basic): -                                                                                           |                                            |                                          |                                              |                                     |        |

| Group/Class - Pharmacologically active Substance                                 | Physicochemical properties                                             | Monitored ion      | Theoretical exact mass MS ( <i>m/z</i> ) | Fragment ions ( <i>m/z</i> ) MS <sup>2</sup>                |                    |        |
|----------------------------------------------------------------------------------|------------------------------------------------------------------------|--------------------|------------------------------------------|-------------------------------------------------------------|--------------------|--------|
|                                                                                  |                                                                        |                    |                                          | [M+H] <sup>+</sup>                                          | [M-H] <sup>-</sup> | Others |
| 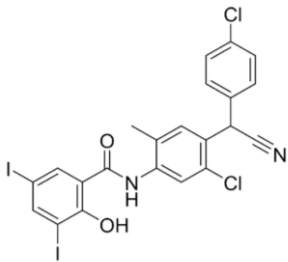 | Partition coefficient<br>(Log P): 7.713                                |                    |                                          |                                                             |                    |        |
|                                                                                  | Intrinsic solubility<br>(mg mL <sup>-1</sup> ): -6.977<br>(Low)        |                    |                                          |                                                             |                    |        |
| <b>Beta-Agonists</b>                                                             |                                                                        |                    |                                          |                                                             |                    |        |
| <i>Cimaterol</i>                                                                 | Molecular formula:<br>C <sub>12</sub> H <sub>17</sub> N <sub>3</sub> O | [M+H] <sup>+</sup> | 220.1444                                 | 202.1331;<br>160.0863;<br>116.0495;<br>143.0599;<br>89.0386 |                    |        |
| CAS registration number:<br>54239-37-1                                           | Monoisotopic mass<br>(Da): 219.1366                                    |                    |                                          |                                                             |                    |        |
| ChemSpider ID:<br>2653                                                           | pKa (strongest acidic):<br>14.11                                       |                    |                                          |                                                             |                    |        |



| Group/Class - Pharmacologically active Substance                                                                                                     | Physicochemical properties                                                                                                                                                              | Monitored ion      | Theoretical exact mass MS ( <i>m/z</i> ) | Fragment ions ( <i>m/z</i> ) MS <sup>2</sup>                 |                    |        |
|------------------------------------------------------------------------------------------------------------------------------------------------------|-----------------------------------------------------------------------------------------------------------------------------------------------------------------------------------------|--------------------|------------------------------------------|--------------------------------------------------------------|--------------------|--------|
|                                                                                                                                                      |                                                                                                                                                                                         |                    |                                          | [M+H] <sup>+</sup>                                           | [M-H] <sup>-</sup> | Others |
| <div>PubChem CID:<br/>2755</div> <div>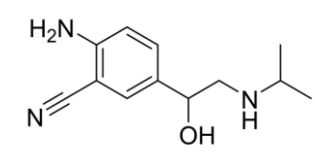</div>                         | <div>pKa (strongest basic):<br/>9.57</div> <div>Partition coefficient<br/>(Log P): 0.702</div> <div>Intrinsic solubility<br/>(mg mL<sup>-1</sup>): -1.605<br/>(High)</div>              |                    |                                          |                                                              |                    |        |
| <div><i>Clenbuterol</i></div> <div>CAS registration number:<br/>37148-27-9</div> <div>ChemSpider ID:<br/>2681</div> <div>PubChem CID:<br/>2783</div> | <div>Molecular formula:<br/>C<sub>12</sub>H<sub>18</sub>Cl<sub>2</sub>N<sub>2</sub>O</div> <div>Monoisotopic mass<br/>(Da): 276.0791</div> <div>pKa (strongest acidic):<br/>14.06</div> | [M+H] <sup>+</sup> | 277.0869                                 | 203.0135;<br>132.0682;<br>259.0763;<br>168.0449;<br>205.0118 |                    |        |

| Group/Class - Pharmacologically active Substance                                 | Physicochemical properties                                            | Monitored ion      | Theoretical exact mass MS ( <i>m/z</i> ) | Fragment ions ( <i>m/z</i> ) MS <sup>2</sup> |                    |        |
|----------------------------------------------------------------------------------|-----------------------------------------------------------------------|--------------------|------------------------------------------|----------------------------------------------|--------------------|--------|
|                                                                                  |                                                                       |                    |                                          | [M+H] <sup>+</sup>                           | [M-H] <sup>-</sup> | Others |
| 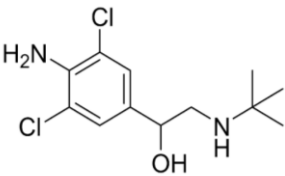 | pKa (strongest basic):<br>9.63                                        |                    |                                          |                                              |                    |        |
|                                                                                  | Partition coefficient<br>(Log P): 2.334                               |                    |                                          |                                              |                    |        |
|                                                                                  | Intrinsic solubility<br>(mg mL <sup>-1</sup> ): -2.992<br>(High)      |                    |                                          |                                              |                    |        |
|                                                                                  |                                                                       |                    |                                          |                                              |                    |        |
| <i>Ractopamine</i>                                                               | Molecular formula:<br>C <sub>18</sub> H <sub>23</sub> NO <sub>3</sub> | [M+H] <sup>+</sup> | 302.1751                                 | 107.0491;<br>284.1645;<br>164.1070;          |                    |        |
| CAS registration number:<br>97825-25-7                                           | Monoisotopic mass<br>(Da): 301.1673                                   |                    |                                          | 121.0648;<br>136.0757                        |                    |        |
| ChemSpider ID:<br>50604                                                          | pKa (strongest acidic):<br>9.19                                       |                    |                                          |                                              |                    |        |
| PubChem CID:                                                                     |                                                                       |                    |                                          |                                              |                    |        |

| Group/Class - Pharmacologically active Substance                                 | Physicochemical properties                                                                                                                    | Monitored ion                              | Theoretical exact mass MS ( <i>m/z</i> ) | Fragment ions ( <i>m/z</i> ) MS <sup>2</sup>                |                                                              |        |
|----------------------------------------------------------------------------------|-----------------------------------------------------------------------------------------------------------------------------------------------|--------------------------------------------|------------------------------------------|-------------------------------------------------------------|--------------------------------------------------------------|--------|
|                                                                                  |                                                                                                                                               |                                            |                                          | [M+H] <sup>+</sup>                                          | [M-H] <sup>-</sup>                                           | Others |
| 56052                                                                            | <p>pKa (strongest basic): 9.89</p> <p>Partition coefficient (Log P): 2.204</p> <p>Intrinsic solubility (mg mL<sup>-1</sup>): -2.46 (High)</p> |                                            |                                          |                                                             |                                                              |        |
| 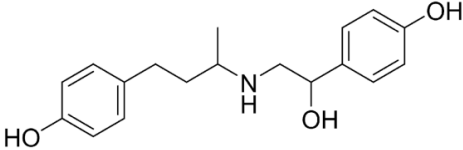 |                                                                                                                                               |                                            |                                          |                                                             |                                                              |        |
| <i>Salbutamol</i>                                                                | Molecular formula: C <sub>13</sub> H <sub>21</sub> NO <sub>3</sub>                                                                            | [M+H] <sup>+</sup> ;<br>[M-H] <sup>-</sup> | 240.1594;<br>238.1449                    | 222.1489;<br>166.0864;<br>148.0758;<br>121.0648;<br>91.0542 | 218.1187;<br>220.1343;<br>190.1237;<br>144.0455;<br>134.0373 |        |
| CAS registration number: 18559-94-9                                              | Monoisotopic mass (Da): 239.1516                                                                                                              |                                            |                                          |                                                             |                                                              |        |
| ChemSpider ID: 1999                                                              | pKa (strongest acidic): 10.12                                                                                                                 |                                            |                                          |                                                             |                                                              |        |
| PubChem CID: 2083                                                                |                                                                                                                                               |                                            |                                          |                                                             |                                                              |        |

| Group/Class - Pharmacologically active Substance                                 | Physicochemical properties                                                          | Monitored ion      | Theoretical exact mass MS ( <i>m/z</i> ) | Fragment ions ( <i>m/z</i> ) MS <sup>2</sup> |                    |        |
|----------------------------------------------------------------------------------|-------------------------------------------------------------------------------------|--------------------|------------------------------------------|----------------------------------------------|--------------------|--------|
|                                                                                  |                                                                                     |                    |                                          | [M+H] <sup>+</sup>                           | [M-H] <sup>-</sup> | Others |
| 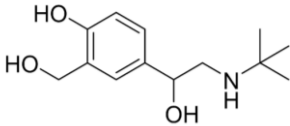 | pKa (strongest basic):<br>9.4                                                       |                    |                                          |                                              |                    |        |
|                                                                                  | Partition coefficient<br>(Log P): 0.344                                             |                    |                                          |                                              |                    |        |
|                                                                                  | Intrinsic solubility<br>(mg mL <sup>-1</sup> ): -0.796<br>(High)                    |                    |                                          |                                              |                    |        |
|                                                                                  |                                                                                     |                    |                                          |                                              |                    |        |
| <i>Zilpaterol</i>                                                                | Molecular formula:<br>C <sub>14</sub> H <sub>19</sub> N <sub>3</sub> O <sub>2</sub> | [M+H] <sup>+</sup> | 262.1550                                 | 244.1442;<br>202.0974;<br>185.0709;          |                    |        |
| CAS registration number:<br>117827-79-9                                          | Monoisotopic mass<br>(Da): 261.1472                                                 |                    |                                          | 157.0760;<br>130.0651                        |                    |        |
| ChemSpider ID:<br>2343170                                                        | pKa (strongest acidic):<br>12.97                                                    |                    |                                          |                                              |                    |        |
| PubChem CID:                                                                     |                                                                                     |                    |                                          |                                              |                    |        |

| Group/Class - Pharmacologically active Substance                                             | Physicochemical properties                                                                                                               | Monitored ion      | Theoretical exact mass MS ( <i>m/z</i> ) | Fragment ions ( <i>m/z</i> ) MS <sup>2</sup> |                    |        |
|----------------------------------------------------------------------------------------------|------------------------------------------------------------------------------------------------------------------------------------------|--------------------|------------------------------------------|----------------------------------------------|--------------------|--------|
|                                                                                              |                                                                                                                                          |                    |                                          | [M+H] <sup>+</sup>                           | [M-H] <sup>-</sup> | Others |
| 25218684<br>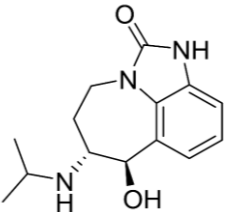 | pKa (strongest basic): 9.14<br><br>Partition coefficient (Log P): 0.84<br><br>Intrinsic solubility (mg mL <sup>-1</sup> ): -2.459 (High) |                    |                                          |                                              |                    |        |
| <b>Sedatives</b>                                                                             |                                                                                                                                          |                    |                                          |                                              |                    |        |
| <i>Acepromazine</i>                                                                          | Molecular formula: C <sub>19</sub> H <sub>22</sub> N <sub>2</sub> OS                                                                     | [M+H] <sup>+</sup> | 327.1526                                 | 254.0627;<br>239.0757;<br>86.0968;           |                    |        |
| CAS registration number: 61-00-7                                                             | Monoisotopic mass (Da): 326.1447                                                                                                         |                    |                                          | 178.0651;<br>150.0464                        |                    |        |
| ChemSpider ID: 5852                                                                          | pKa (strongest acidic): -                                                                                                                |                    |                                          |                                              |                    |        |

| Group/Class - Pharmacologically active Substance                                 | Physicochemical properties                                              | Monitored ion      | Theoretical exact mass MS ( <i>m/z</i> ) | Fragment ions ( <i>m/z</i> ) MS <sup>2</sup> |                    |        |
|----------------------------------------------------------------------------------|-------------------------------------------------------------------------|--------------------|------------------------------------------|----------------------------------------------|--------------------|--------|
|                                                                                  |                                                                         |                    |                                          | [M+H] <sup>+</sup>                           | [M-H] <sup>-</sup> | Others |
| PubChem CID:<br>6077                                                             | pKa (strongest basic):<br>9.11                                          |                    |                                          |                                              |                    |        |
| 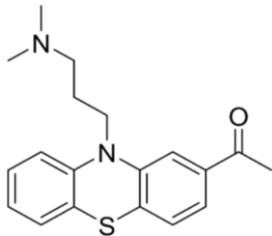 | Partition coefficient<br>(Log P): 3.489                                 |                    |                                          |                                              |                    |        |
|                                                                                  | Intrinsic solubility<br>(mg mL <sup>-1</sup> ): -4.437<br>(Moderate)    |                    |                                          |                                              |                    |        |
| <i>Azaperol</i>                                                                  | Molecular formula:<br>C <sub>19</sub> H <sub>24</sub> FN <sub>3</sub> O | [M+H] <sup>+</sup> | 330.1976                                 | 312.1869;<br>192.1183;<br>149.1074;          |                    |        |
| CAS registration number:<br>2804-05-9                                            | Monoisotopic mass<br>(Da): 329.1898                                     |                    |                                          | 147.0917;<br>121.0762                        |                    |        |
| ChemSpider ID:<br>2338342                                                        | pKa (strongest acidic):<br>14.44                                        |                    |                                          |                                              |                    |        |
| PubChem CID:<br>3080589                                                          |                                                                         |                    |                                          |                                              |                    |        |

| Group/Class - Pharmacologically active Substance                                 | Physicochemical properties                                           | Monitored ion      | Theoretical exact mass MS ( <i>m/z</i> ) | Fragment ions ( <i>m/z</i> ) MS <sup>2</sup> |                    |        |
|----------------------------------------------------------------------------------|----------------------------------------------------------------------|--------------------|------------------------------------------|----------------------------------------------|--------------------|--------|
|                                                                                  |                                                                      |                    |                                          | [M+H] <sup>+</sup>                           | [M-H] <sup>-</sup> | Others |
| 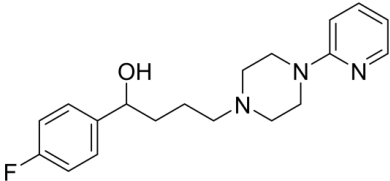 | pK <sub>a</sub> (strongest basic): 8.75                              |                    |                                          |                                              |                    |        |
|                                                                                  | Partition coefficient (Log P): 3.119                                 |                    |                                          |                                              |                    |        |
|                                                                                  | Intrinsic solubility (mg mL <sup>-1</sup> ): -2.692 (High)           |                    |                                          |                                              |                    |        |
|                                                                                  |                                                                      |                    |                                          |                                              |                    |        |
| <i>Azaperone</i>                                                                 | Molecular formula: C <sub>19</sub> H <sub>22</sub> FN <sub>3</sub> O | [M+H] <sup>+</sup> | 328.1820                                 | 165.0710;                                    | 149.1073;          |        |
| CAS registration number: 1649-18-9                                               |                                                                      |                    |                                          | 147.0917;                                    | 121.0762;          |        |
| ChemSpider ID: 14695                                                             | Monoisotopic mass (Da): 327.1741                                     |                    |                                          | 123.0241                                     |                    |        |
|                                                                                  | pK <sub>a</sub> (strongest acidic): -                                |                    |                                          |                                              |                    |        |
| PubChem CID:                                                                     |                                                                      |                    |                                          |                                              |                    |        |

| Group/Class - Pharmacologically active Substance                                                                  | Physicochemical properties                                                                                                                                             | Monitored ion      | Theoretical exact mass MS ( <i>m/z</i> ) | Fragment ions ( <i>m/z</i> ) MS <sup>2</sup>               |                    |        |
|-------------------------------------------------------------------------------------------------------------------|------------------------------------------------------------------------------------------------------------------------------------------------------------------------|--------------------|------------------------------------------|------------------------------------------------------------|--------------------|--------|
|                                                                                                                   |                                                                                                                                                                        |                    |                                          | [M+H] <sup>+</sup>                                         | [M-H] <sup>-</sup> | Others |
| 15443<br><br>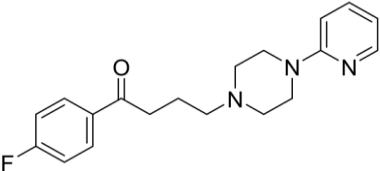                     | pKa (strongest basic):<br>8.31<br><br>Partition coefficient<br>(Log P): 3.206<br><br>Intrinsic solubility<br>(mg mL <sup>-1</sup> ): -3.149<br>(High)                  |                    |                                          |                                                            |                    |        |
| <i>Carazolol</i><br><br>CAS registration number:<br>57775-29-8<br><br>ChemSpider ID:<br>64783<br><br>PubChem CID: | Molecular formula:<br>C <sub>18</sub> H <sub>22</sub> N <sub>2</sub> O <sub>2</sub><br><br>Monoisotopic mass<br>(Da): 298.1676<br><br>pKa (strongest acidic):<br>14.03 | [M+H] <sup>+</sup> | 299.1754                                 | 194.0964;<br>139.0542;<br>116.1070;<br>89.0386;<br>74.0600 |                    |        |



| Group/Class - Pharmacologically active Substance                                                             | Physicochemical properties                                                                                                                                 | Monitored ion      | Theoretical exact mass MS ( <i>m/z</i> ) | Fragment ions ( <i>m/z</i> ) MS <sup>2</sup>                |                    |        |
|--------------------------------------------------------------------------------------------------------------|------------------------------------------------------------------------------------------------------------------------------------------------------------|--------------------|------------------------------------------|-------------------------------------------------------------|--------------------|--------|
|                                                                                                              |                                                                                                                                                            |                    |                                          | [M+H] <sup>+</sup>                                          | [M-H] <sup>-</sup> | Others |
| 71739<br><br>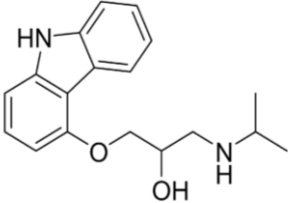                | pK <sub>a</sub> (strongest basic): 9.27<br><br>Partition coefficient (Log P): 2.712<br><br>Intrinsic solubility (mg mL <sup>-1</sup> ): -4.379 (Moderate)  |                    |                                          |                                                             |                    |        |
| <i>Chlorpromazine</i><br><br>CAS registration number: 50-53-3<br><br>ChemSpider ID: 2625<br><br>PubChem CID: | Molecular formula: C <sub>17</sub> H <sub>19</sub> ClN <sub>2</sub> S<br><br>Monoisotopic mass (Da): 318.0952<br><br>pK <sub>a</sub> (strongest acidic): - | [M+H] <sup>+</sup> | 319.1030                                 | 86.0964;<br>246.0139;<br>319.1030;<br>214.0418;<br>239.0763 |                    |        |

| Group/Class - Pharmacologically active Substance                                         | Physicochemical properties                                                                                                                              | Monitored ion      | Theoretical exact mass MS ( <i>m/z</i> ) | Fragment ions ( <i>m/z</i> ) MS <sup>2</sup> |                    |        |
|------------------------------------------------------------------------------------------|---------------------------------------------------------------------------------------------------------------------------------------------------------|--------------------|------------------------------------------|----------------------------------------------|--------------------|--------|
|                                                                                          |                                                                                                                                                         |                    |                                          | [M+H] <sup>+</sup>                           | [M-H] <sup>-</sup> | Others |
| 2726<br>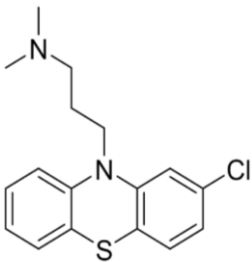 | <p>pK<sub>a</sub> (strongest basic): 9.2</p> <p>Partition coefficient (Log P): 4.535</p> <p>Intrinsic solubility (mg mL<sup>-1</sup>): -4.848 (Low)</p> |                    |                                          |                                              |                    |        |
| <b>Prospecting sedatives</b>                                                             |                                                                                                                                                         |                    |                                          |                                              |                    |        |
| <i>Xylazine</i>                                                                          | Molecular formula: C <sub>12</sub> H <sub>16</sub> N <sub>2</sub> S                                                                                     | [M+H] <sup>+</sup> | 221.1107                                 | 164.0528;                                    |                    |        |
| CAS registration number: 7361-61-7                                                       |                                                                                                                                                         |                    |                                          | 105.0699;                                    |                    |        |
|                                                                                          |                                                                                                                                                         |                    |                                          | 95.0491;                                     |                    |        |
|                                                                                          |                                                                                                                                                         |                    |                                          | 90.0372;                                     |                    |        |
|                                                                                          |                                                                                                                                                         |                    |                                          | 71.9902                                      |                    |        |
| ChemSpider ID:                                                                           |                                                                                                                                                         |                    |                                          |                                              |                    |        |

| Group/Class - Pharmacologically active Substance                                 | Physicochemical properties                                        | Monitored ion    | Theoretical exact mass MS ( <i>m/z</i> ) | Fragment ions ( <i>m/z</i> ) MS <sup>2</sup> |                    |                                                                   |
|----------------------------------------------------------------------------------|-------------------------------------------------------------------|------------------|------------------------------------------|----------------------------------------------|--------------------|-------------------------------------------------------------------|
|                                                                                  |                                                                   |                  |                                          | [M+H] <sup>+</sup>                           | [M-H] <sup>-</sup> | Others                                                            |
| 5505                                                                             | pKa (strongest acidic): -                                         |                  |                                          |                                              |                    |                                                                   |
| PubChem CID: 5707                                                                | pKa (strongest basic): 9.54                                       |                  |                                          |                                              |                    |                                                                   |
| 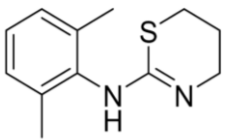 | Partition coefficient (Log P): 3.633                              |                  |                                          |                                              |                    |                                                                   |
|                                                                                  | Intrinsic solubility (mg mL <sup>-1</sup> ): -3.572 (Moderate)    |                  |                                          |                                              |                    |                                                                   |
| <b>Corants</b>                                                                   |                                                                   |                  |                                          |                                              |                    |                                                                   |
| <i>Gentian violet/Crystal violet</i>                                             | Molecular formula: C <sub>25</sub> H <sub>30</sub> N <sub>3</sub> | [M] <sup>+</sup> | 372.2434                                 |                                              |                    | [M] <sup>+</sup> 356.2121; 328.1934; 239.0855; 340.1808; 268.1121 |
| CAS registration number: 548-62-9                                                | Monoisotopic mass (Da): 372.2434                                  |                  |                                          |                                              |                    |                                                                   |
| ChemSpider ID:                                                                   |                                                                   |                  |                                          |                                              |                    |                                                                   |

| Group/Class - Pharmacologically active Substance                                 | Physicochemical properties                                                                                                                            | Monitored ion      | Theoretical exact mass MS ( <i>m/z</i> ) | Fragment ions ( <i>m/z</i> ) MS <sup>2</sup> |                    |        |
|----------------------------------------------------------------------------------|-------------------------------------------------------------------------------------------------------------------------------------------------------|--------------------|------------------------------------------|----------------------------------------------|--------------------|--------|
|                                                                                  |                                                                                                                                                       |                    |                                          | [M+H] <sup>+</sup>                           | [M-H] <sup>-</sup> | Others |
| 10588                                                                            | pKa (strongest acidic): -                                                                                                                             |                    |                                          |                                              |                    |        |
| PubChem CID: 11057                                                               | pKa (strongest basic): 4.83                                                                                                                           |                    |                                          |                                              |                    |        |
| 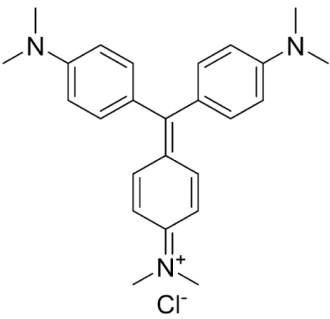 | Partition coefficient (Log P): 1.396                                                                                                                  |                    |                                          |                                              |                    |        |
|                                                                                  | Intrinsic solubility (mg mL <sup>-1</sup> ): The molecule cannot be neutralized and the calculation is not defined for molecules with non-zero charge |                    |                                          |                                              |                    |        |
| <i>Gentian violet/Crystal violet metabolite (Leucocrystal Violet)</i>            | Molecular formula: C <sub>25</sub> H <sub>31</sub> N <sub>3</sub>                                                                                     | [M+H] <sup>+</sup> | 374.2591                                 | 358.2278;<br>239.1543;<br>237.1386;          |                    |        |
| CAS registration number: 603-48-5                                                | Monoisotopic mass (Da): 373.2513                                                                                                                      |                    |                                          | 165.0699;<br>152.0621                        |                    |        |
| ChemSpider ID:                                                                   | pKa (strongest acidic): -                                                                                                                             |                    |                                          |                                              |                    |        |

| Group/Class - Pharmacologically active Substance                                                                           | Physicochemical properties                                                                                                                                           | Monitored ion    | Theoretical exact mass<br>MS ( <i>m/z</i> ) | Fragment ions ( <i>m/z</i> ) MS <sup>2</sup> |                    |                                                                                  |
|----------------------------------------------------------------------------------------------------------------------------|----------------------------------------------------------------------------------------------------------------------------------------------------------------------|------------------|---------------------------------------------|----------------------------------------------|--------------------|----------------------------------------------------------------------------------|
|                                                                                                                            |                                                                                                                                                                      |                  |                                             | [M+H] <sup>+</sup>                           | [M-H] <sup>-</sup> | Others                                                                           |
| 62270<br><br>PubChem CID:<br>69048<br><br>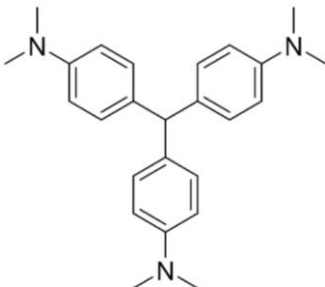 | pK <sub>a</sub> (strongest basic):<br>5.36<br><br>Partition coefficient<br>(Log P): 5.81<br><br>Intrinsic solubility<br>(mg mL <sup>-1</sup> ): -4.153<br>(Moderate) |                  |                                             |                                              |                    |                                                                                  |
| <i>Malachite green</i><br><br>CAS registration number:<br>569-64-2<br><br>ChemSpider ID:<br>10820                          | Molecular formula:<br>C <sub>23</sub> H <sub>25</sub> N <sub>2</sub><br><br>Monoisotopic mass<br>(Da): 329.2012<br><br>pK <sub>a</sub> (strongest acidic):           | [M] <sup>+</sup> | 329.2012                                    |                                              |                    | [M] <sup>+</sup><br>313.1699;<br>208.1121;<br>165.0699;<br>239.0855;<br>163.0542 |

| Group/Class - Pharmacologically active Substance                                                                           | Physicochemical properties                                                                                                                                                                                                                    | Monitored ion      | Theoretical exact mass MS ( <i>m/z</i> ) | Fragment ions ( <i>m/z</i> ) MS <sup>2</sup>                 |                    |        |
|----------------------------------------------------------------------------------------------------------------------------|-----------------------------------------------------------------------------------------------------------------------------------------------------------------------------------------------------------------------------------------------|--------------------|------------------------------------------|--------------------------------------------------------------|--------------------|--------|
|                                                                                                                            |                                                                                                                                                                                                                                               |                    |                                          | [M+H] <sup>+</sup>                                           | [M-H] <sup>-</sup> | Others |
| PubChem CID:<br>11294<br><br>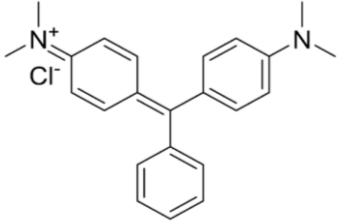              | pKa (strongest basic):<br>4.52<br><br>Partition coefficient<br>(Log P): 1.287<br><br>Intrinsic solubility<br>(mg mL <sup>-1</sup> ): The molecule cannot be neutralized and the calculation is not defined for molecules with non-zero charge |                    |                                          |                                                              |                    |        |
| <i>Malachite green metabolite (Leucomalachite green)</i><br><br>CAS registration number:<br>129-73-7<br><br>ChemSpider ID: | Molecular formula:<br>C <sub>23</sub> H <sub>26</sub> N <sub>2</sub><br><br>Monoisotopic mass<br>(Da): 330.2091<br><br>pKa (strongest acidic): -                                                                                              | [M+H] <sup>+</sup> | 331.2169                                 | 239.1543;<br>223.1230;<br>165.0699;<br>153.0699;<br>152.0621 |                    |        |

| Group/Class - Pharmacologically active Substance                                                                           | Physicochemical properties                                                                                                                                | Monitored ion | Theoretical exact mass<br>MS ( <i>m/z</i> ) | Fragment ions ( <i>m/z</i> ) MS <sup>2</sup> |                    |        |
|----------------------------------------------------------------------------------------------------------------------------|-----------------------------------------------------------------------------------------------------------------------------------------------------------|---------------|---------------------------------------------|----------------------------------------------|--------------------|--------|
|                                                                                                                            |                                                                                                                                                           |               |                                             | [M+H] <sup>+</sup>                           | [M-H] <sup>-</sup> | Others |
| 60551<br><br>PubChem CID:<br>67215<br><br>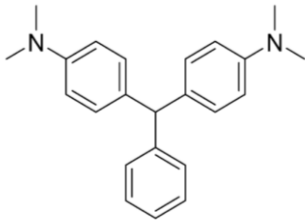 | pKa (strongest basic):<br>5.17<br><br>Partition coefficient<br>(Log P): 5.702<br><br>Intrinsic solubility<br>(mg mL <sup>-1</sup> ):<br>-4.376 (Moderate) |               |                                             |                                              |                    |        |

Values were calculated using online Data taken from Chemicalize: log P: octanol/water partition coefficient [107]; pKa: acid/base dissociation constants data taken from computational predictions from [108]; solubility information: low: if < 0.01 mg mL<sup>-1</sup>; moderate: if is between 0.01 and 0.06 mg mL<sup>-1</sup> and high if > 0.06 mg mL<sup>-1</sup> [109]. Chemical structures were drawn using Chemdraw version 18.1 [110]. Identification numbers were taken from Chemspider [111] and PubChem [112].

**Table S5.** Retention time of veterinary drugs and their metabolites evaluated by Q-Exactive Orbitrap HRMS.

| Group/Class - Pharmacologically active<br>Substance      | Retention time (min) |                   |                             |                    |                             |                   |
|----------------------------------------------------------|----------------------|-------------------|-----------------------------|--------------------|-----------------------------|-------------------|
|                                                          | Method A             |                   | Method B*                   |                    |                             |                   |
|                                                          |                      |                   | Aqueous extract<br>(Tube 1) |                    | Organic extract<br>(Tube 2) |                   |
|                                                          | HESI <sup>+</sup>    | HESI <sup>-</sup> | HESI <sup>+</sup>           | HESI <sup>-</sup>  | HESI <sup>+</sup>           | HESI <sup>-</sup> |
| <b>Antimicrobials/Aminoglycosides</b>                    |                      |                   |                             |                    |                             |                   |
| Amikacin                                                 |                      |                   |                             |                    |                             |                   |
| Apramycin                                                |                      |                   |                             |                    |                             |                   |
| Dihydrostreptomycin                                      |                      |                   |                             |                    |                             |                   |
| Spectinomycin                                            |                      |                   |                             |                    |                             |                   |
| Streptomycin                                             |                      |                   |                             |                    |                             |                   |
| Gentamicin (Gentamicin C <sub>1</sub> )                  |                      |                   |                             |                    |                             |                   |
| Gentamicin (Gentamicin C <sub>1a</sub> )                 |                      |                   |                             |                    |                             |                   |
| Gentamicin (Gentamicin C <sub>2</sub> -C <sub>2a</sub> ) |                      |                   |                             |                    |                             |                   |
| Hygromycin (Hygromycin B)                                |                      |                   |                             |                    |                             |                   |
| Kanamycin (Kanamycin A)                                  |                      |                   |                             |                    |                             |                   |
| Neomycin (Neomycin B)                                    |                      |                   |                             |                    |                             |                   |
| Tobramycin                                               |                      |                   |                             |                    |                             |                   |
| <b>Antimicrobials/Amphenicols</b>                        |                      |                   |                             |                    |                             |                   |
| Chloramphenicol                                          |                      |                   |                             | 8.53               |                             |                   |
| Florfenicol                                              |                      | 7.19              | 7.27                        |                    |                             |                   |
| Thiamphenicol                                            |                      | 6.47              |                             | 4.92               |                             |                   |
| <b>Antimicrobials/Betalactams</b>                        |                      |                   |                             |                    |                             |                   |
| Amoxicillin                                              |                      |                   |                             |                    |                             |                   |
| Ampicillin                                               |                      | 6.85              |                             | 7.39               |                             |                   |
| Cephalexin                                               |                      | 6.62              |                             | 5.07               |                             |                   |
| Cefalonium                                               |                      |                   |                             | 4.89               |                             |                   |
| Cephapirin                                               |                      | 5.78              |                             | 3.82               |                             |                   |
| Cefazolin                                                |                      |                   |                             | 6.26               |                             |                   |
| Cefoperazone                                             |                      |                   |                             | 8.15               |                             |                   |
| Cefquinome                                               |                      | 6.17              |                             | 5.32               |                             |                   |
| Cloxacillin                                              |                      | 9.55 <sup>a</sup> |                             | 11.08 <sup>b</sup> |                             |                   |
| Dicloxacillin                                            |                      | 9.85 <sup>b</sup> |                             | 11.36              |                             |                   |
| Nafcillin                                                |                      | 9.84 <sup>c</sup> |                             | 9.20               |                             |                   |
| Oxacillin                                                |                      | 9.38 <sup>a</sup> |                             | 9.79 <sup>c</sup>  |                             |                   |
| Benzylpenicillin                                         |                      | 7.26              |                             | 9.96               |                             |                   |
| Phenoxymethylpenicillin/Phenoxymethyl V<br>penicillin    |                      | 9.45 <sup>a</sup> |                             | 10.48 <sup>c</sup> |                             |                   |
| <b>Antimicrobials/Lincosamides</b>                       |                      |                   |                             |                    |                             |                   |
| Clindamycin                                              |                      | 8.47              |                             | 9.41               |                             |                   |



| Group/Class - Pharmacologically active Substance  | Retention time (min) |                   |                          |                   |                          |                   |
|---------------------------------------------------|----------------------|-------------------|--------------------------|-------------------|--------------------------|-------------------|
|                                                   | Method A             |                   | Method B*                |                   |                          |                   |
|                                                   | HESI <sup>+</sup>    | HESI <sup>-</sup> | Aqueous extract (Tube 1) |                   | Organic extract (Tube 2) |                   |
|                                                   | HESI <sup>+</sup>    | HESI <sup>-</sup> | HESI <sup>+</sup>        | HESI <sup>-</sup> | HESI <sup>+</sup>        | HESI <sup>-</sup> |
| Lincomycin                                        |                      | 6.31              | 4.54                     |                   |                          |                   |
| <b>Antimicrobials/Macrolides</b>                  |                      |                   |                          |                   |                          |                   |
| Azithromycin                                      |                      |                   | 9.34                     |                   |                          |                   |
| Erythromycin (Erythromycin A-H <sub>2</sub> O)    | 9.20                 |                   | 10.58 <sup>d</sup>       |                   |                          |                   |
| Spiramycin (Spiramycin I)                         | 7.35 <sup>e</sup>    |                   | 9.34                     |                   |                          |                   |
| Tilmicosin                                        |                      | 6.30              | 9.92                     |                   |                          |                   |
| Tylosin (Tylosin A)                               | 8.84                 |                   | 10.39                    |                   |                          |                   |
| <b>Antimicrobials/Quinolones-Fluoroquinolones</b> |                      |                   |                          |                   |                          |                   |
| Nalidixic acid                                    | 8.89                 |                   | 10.09                    |                   |                          |                   |
| Oxolinic acid                                     | 8.12                 |                   | 8.90                     |                   |                          |                   |
| Ciprofloxacin                                     | 6.62                 |                   | 6.29                     |                   |                          |                   |
| Danofloxacin                                      | 6.63                 |                   | 6.78                     |                   |                          |                   |
| Difloxacin                                        | 6.83                 |                   | 7.72                     |                   |                          |                   |
| Enrofloxacin                                      | 6.62                 |                   | 6.94                     |                   |                          |                   |
| Flumequine                                        | 9.11                 |                   | 10.40                    |                   |                          |                   |
| Norfloxacin                                       | 6.56                 |                   | 6.07                     |                   |                          |                   |
| Sarafloxacin                                      | 6.94                 |                   | 7.62                     |                   |                          |                   |
| <b>Antimicrobials/Sulphonamides</b>               |                      |                   |                          |                   |                          |                   |
| Sulfachlorpyridazine                              | 6.99                 |                   | 6.49                     |                   |                          |                   |
| Sulfadiazine                                      | 5.54                 |                   | 2.41                     |                   |                          |                   |
| Sulfadimethoxine                                  | 7.94                 |                   | 9.52                     |                   |                          |                   |
| Sulfadoxine                                       | 7.15                 |                   |                          | 7.21              |                          |                   |
| Sulfisoxazole/Sulfafurazole                       | 7.25                 |                   | 8.03                     |                   |                          |                   |
| Sulfamerazine                                     |                      | 6.19              | 3.97                     |                   |                          |                   |
| Sulfamethazine/Sulfadimidine                      | 6.68                 |                   | 5.19                     |                   |                          |                   |
| Sulfathiazole                                     | 5.86                 |                   | 3.65                     |                   |                          |                   |
| Sulfamethoxazole                                  | 7.07                 |                   | 7.19                     |                   |                          |                   |
| Sulfaquinoxaline                                  | 8.09                 |                   | 9.67                     |                   |                          |                   |
| <b>Antimicrobials/Tetracyclines</b>               |                      |                   |                          |                   |                          |                   |
| Chlortetracycline                                 | 7.82                 |                   | 8.51                     |                   |                          |                   |
| Doxycycline                                       | 6.80                 |                   | 6.21                     |                   |                          |                   |
| Oxytetracycline                                   |                      | 6.93              |                          |                   |                          |                   |
| Tetracycline                                      | 8.35                 |                   | 6.21                     |                   |                          |                   |
| <b>Antimicrobials/Others</b>                      |                      |                   |                          |                   |                          |                   |
| Bromhexine                                        | 9.06                 |                   | 10.41                    |                   |                          |                   |
| Dapsone                                           | 6.47                 |                   | 6.12                     |                   |                          |                   |

| Group/Class - Pharmacologically active Substance                       | Retention time (min) |                   |                          |                   |                          |                   |
|------------------------------------------------------------------------|----------------------|-------------------|--------------------------|-------------------|--------------------------|-------------------|
|                                                                        | Method A             |                   | Method B*                |                   |                          |                   |
|                                                                        | HESI <sup>+</sup>    | HESI <sup>-</sup> | Aqueous extract (Tube 1) |                   | Organic extract (Tube 2) |                   |
|                                                                        | HESI <sup>+</sup>    | HESI <sup>-</sup> | HESI <sup>+</sup>        | HESI <sup>-</sup> | HESI <sup>+</sup>        | HESI <sup>-</sup> |
| Rifampicin                                                             |                      | 9.90              |                          | 11.47             |                          |                   |
| Tiamulin                                                               | 8.86                 |                   | 10.64                    |                   |                          |                   |
| <b>Antimicrobials Prospect/Quinolones-Fluoroquinolones</b>             |                      |                   |                          |                   |                          |                   |
| Marbofloxacin                                                          | 6.23                 |                   | 5.60                     |                   |                          |                   |
| <b>Antimicrobials Prospect/Macrolides</b>                              |                      |                   |                          |                   |                          |                   |
| Josamycin/Leucomycin A <sub>3</sub>                                    |                      |                   | 11.04                    |                   |                          |                   |
| Leucomycin/Leucomycin A <sub>5</sub>                                   | 8.98                 |                   | 10.61                    |                   |                          |                   |
| Tildipirosin                                                           | 5.43                 |                   |                          |                   | 9.23                     |                   |
| Tulathromycin (Tulathromycin A)                                        | 6.30                 |                   | 5.44                     |                   |                          |                   |
| <b>Antimicrobials Prospect/ Sulfonamides</b>                           |                      |                   |                          |                   |                          |                   |
| Phthalylsulfathiazole                                                  |                      | 7.48              | 8.62                     |                   |                          |                   |
| Sulfacetamide/ <i>N</i> -Sulfanilylacetamide                           | 5.62                 |                   |                          | 1.46              |                          |                   |
| Sulfamethoxypyridazine                                                 | 6.78                 |                   | 5.75                     |                   |                          |                   |
| <b>Antimicrobials Prospect/Others</b>                                  |                      |                   |                          |                   |                          |                   |
| Diminazene                                                             | 5.39                 |                   |                          |                   |                          |                   |
| Fosfomycin                                                             |                      |                   |                          |                   |                          |                   |
| Isoniazid                                                              | 1.35                 |                   |                          |                   |                          |                   |
| Novobiocin                                                             |                      |                   |                          |                   | 10.58                    |                   |
| Rifaximin                                                              |                      | 10.35             |                          | 11.75             |                          |                   |
| <b>Antibiotic Growth Promoters</b>                                     |                      |                   |                          |                   |                          |                   |
| Avilamycin (Dichloroisoevertinic acid)                                 |                      | 7.99              |                          | 7.06              |                          |                   |
| Halquinol/Chlorhydroxyquinoline (7-Chloro-8-quinolinol)                |                      |                   |                          |                   | 9.98                     |                   |
| Halquinol/Chlorhydroxyquinoline (5,7-Dichloro-8-quinolinol/Chloroxine) |                      |                   |                          |                   | 10.58                    |                   |
| Halquinol/Chlorhydroxyquinoline (5-Chloro-8-hydroxyquinoline)          |                      |                   |                          |                   | 10.16                    |                   |
| Virginiamycin (Virginiamycin M <sub>1</sub> )                          | 9.60 <sup>a</sup>    |                   | 10.96                    |                   |                          |                   |
| <b>Anticoccidials</b>                                                  |                      |                   |                          |                   |                          |                   |
| Amprolium                                                              |                      |                   |                          |                   |                          |                   |
| Clopidol                                                               | 6.40                 |                   | 2.94                     |                   |                          |                   |
| Diaveridine                                                            | 6.12                 |                   | 4.68                     |                   |                          |                   |
| Decoquinate                                                            |                      | 13.46             | 13.49                    |                   |                          |                   |
| Diclazuril                                                             |                      | 11.02             |                          |                   |                          | 10.55             |
| Ethopabate                                                             | 8.65 <sup>a</sup>    |                   | 9.33                     |                   |                          |                   |
| Lasalocid (Lasalocid A)                                                |                      |                   |                          |                   |                          | 13.12             |
| Maduramicin                                                            |                      |                   |                          |                   |                          |                   |

| Group/Class - Pharmacologically active Substance                   | Retention time (min) |                   |                          |                   |                          |                   |
|--------------------------------------------------------------------|----------------------|-------------------|--------------------------|-------------------|--------------------------|-------------------|
|                                                                    | Method A             |                   | Method B*                |                   |                          |                   |
|                                                                    | HESI <sup>+</sup>    | HESI <sup>-</sup> | Aqueous extract (Tube 1) |                   | Organic extract (Tube 2) |                   |
|                                                                    | HESI <sup>+</sup>    | HESI <sup>-</sup> | HESI <sup>+</sup>        | HESI <sup>-</sup> | HESI <sup>+</sup>        | HESI <sup>-</sup> |
| Monensin (Monensin A)                                              |                      |                   |                          |                   |                          |                   |
| Narasin (Narasin A)                                                |                      |                   |                          |                   |                          |                   |
| Nicarbazin (4,4'-Dinitrocarbanilide - DNC)                         |                      | 10.69             |                          |                   |                          | 10.37             |
| Robenidine                                                         | 9.87                 |                   |                          |                   | 10.18                    |                   |
| Salinomycin                                                        | 13.08 <sup>a</sup>   |                   |                          | 13.84             |                          |                   |
| Toltrazuril                                                        |                      |                   |                          |                   |                          |                   |
| Trimethoprim                                                       | 6.28                 |                   |                          |                   | 9.35                     |                   |
| <b>Anti-inflammatory/Steroidal</b>                                 |                      |                   |                          |                   |                          |                   |
| Prednisolone                                                       |                      |                   | 10.03                    |                   |                          |                   |
| Prednisone                                                         |                      |                   | 10.02                    |                   |                          |                   |
| <b>Anti-inflammatory Prospect/Steroidal</b>                        |                      |                   |                          |                   |                          |                   |
| Isoflupredone acetate/9-Fluoroprednisolone acetate                 |                      |                   |                          |                   |                          |                   |
| Flumetasone                                                        |                      |                   |                          |                   |                          |                   |
| <b>Anti-Inflammatory/Non-Steroidal</b>                             |                      |                   |                          |                   |                          |                   |
| Mefenamic acid                                                     |                      | 11.99             |                          |                   |                          | 10.70             |
| Tolfenamic acid                                                    |                      | 11.06             |                          |                   |                          | 10.41             |
| Carprofen                                                          |                      | 11.08             |                          | 11.93             |                          |                   |
| Ketoprofen                                                         |                      | 9.96              | 11.22                    |                   |                          |                   |
| Diclofenac                                                         |                      |                   |                          | 12.11             |                          |                   |
| Flunixin                                                           |                      | 11.05             |                          | 11.13             |                          |                   |
| Indomethacin                                                       |                      |                   |                          | 12.12             |                          |                   |
| Meloxicam                                                          |                      | 9.74              | 11.24                    |                   |                          |                   |
| Naproxen                                                           |                      |                   |                          |                   |                          |                   |
| Nimesulide                                                         |                      | 9.82              |                          | 11.63             |                          |                   |
| Piroxycam                                                          | 8.66                 |                   | 10.16                    |                   |                          |                   |
| Propyphenazone                                                     | 9.19                 |                   | 10.38                    |                   |                          |                   |
| <b>Antiparasitic/Avermectins</b>                                   |                      |                   |                          |                   |                          |                   |
| Avermectin B <sub>1a</sub> /Abamectin B <sub>1a</sub>              |                      |                   |                          |                   |                          |                   |
| Doramectin                                                         |                      |                   |                          |                   |                          |                   |
| Emamectin (Emamectin B <sub>1a</sub> )                             | 11.48                |                   |                          |                   |                          |                   |
| Eprinomectin (Eprinomectin B <sub>1a</sub> )                       |                      |                   |                          |                   |                          |                   |
| Ivermectin B <sub>1a</sub> /22,23-Dihydroavermectin B <sub>1</sub> |                      |                   |                          |                   |                          |                   |
| Moxidectin                                                         |                      |                   |                          |                   | 11.73                    |                   |
| <b>Antiparasitic/Benzimidazoles</b>                                |                      |                   |                          |                   |                          |                   |
| Albendazole                                                        | 10.04                |                   | 10.48                    |                   |                          |                   |

| Group/Class - Pharmacologically active Substance          | Retention time (min) |                   |                          |                   |                          |                   |
|-----------------------------------------------------------|----------------------|-------------------|--------------------------|-------------------|--------------------------|-------------------|
|                                                           | Method A             |                   | Method B*                |                   |                          |                   |
|                                                           |                      |                   | Aqueous extract (Tube 1) |                   | Organic extract (Tube 2) |                   |
|                                                           | HESI <sup>+</sup>    | HESI <sup>-</sup> | HESI <sup>+</sup>        | HESI <sup>-</sup> | HESI <sup>+</sup>        | HESI <sup>-</sup> |
| Albendazole metabolite (Albendazole sulfone)              | 8.07                 |                   | 8.57                     |                   |                          |                   |
| Albendazole metabolite (Albendazole sulfoxide)            | 7.95                 |                   | 7.01                     |                   |                          |                   |
| Closantel                                                 |                      | 11.06             |                          | 14.64             |                          |                   |
| Febantel                                                  | 10.80                |                   | 12.18                    |                   |                          |                   |
| Fenbendazole                                              | 10.57                |                   | 11.24                    |                   |                          |                   |
| Fenbendazole metabolite (Fenbendazole sulfone)            | 8.66                 |                   | 10.16                    |                   |                          |                   |
| Flubendazole                                              | 9.68                 |                   | 10.58                    |                   |                          |                   |
| Flubendazole metabolite (2-Aminoflubendazole)             | 8.07                 |                   | 8.79                     |                   |                          |                   |
| Levamisole                                                | 5.83                 |                   | 3.52                     |                   |                          |                   |
| Mebendazole                                               | 9.44                 |                   | 10.34                    |                   |                          |                   |
| Oxibendazole                                              | 8.96                 |                   | 9.11                     |                   |                          |                   |
| Oxfendazole                                               | 8.85                 |                   | 9.21                     |                   |                          |                   |
| Thiabendazole                                             | 7.10                 |                   | 4.53                     |                   |                          |                   |
| Triclabendazole                                           |                      | 11.84             |                          |                   | 10.67                    |                   |
| <b>Antiparasitic/Phenylpyrazoles</b>                      |                      |                   |                          |                   |                          |                   |
| Fipronil                                                  |                      | 10.90             |                          | 12.65             |                          |                   |
| Fipronil metabolite (Fipronil sulfone)                    |                      | 11.14             |                          | 13.04             |                          |                   |
| <b>Antiparasitic/Nitroimidazoles</b>                      |                      |                   |                          |                   |                          |                   |
| Dimetridazole                                             |                      |                   |                          |                   |                          |                   |
| Dimetridazole metabolite (Hydroxydimetridazole/HMMNI)     |                      |                   |                          |                   |                          |                   |
| Ipronidazole                                              | 7.87                 |                   | 6.70                     |                   |                          |                   |
| Ipronidazole metabolite (Hydroxy Ipronidazole)            | 7.28                 |                   |                          |                   |                          |                   |
| Metronidazole                                             |                      |                   |                          |                   |                          |                   |
| Metronidazole metabolite (Hydroxymetronidazole)           |                      |                   |                          |                   |                          |                   |
| Ronidazole/1-Methyl-2-carbamoyloxymethyl-5-nitroimidazole |                      |                   |                          |                   |                          |                   |
| <b>Antiparasitic/Isoquinoline-pyrazines</b>               |                      |                   |                          |                   |                          |                   |
| Praziquantel                                              | 10.16                |                   | 11.24                    |                   |                          |                   |
| <b>Beta-Agonists</b>                                      |                      |                   |                          |                   |                          |                   |
| Cimaterol                                                 |                      |                   |                          |                   |                          |                   |
| Clenbuterol                                               |                      |                   |                          |                   |                          |                   |
| Ractopamine                                               |                      |                   |                          |                   |                          |                   |
| Salbutamol                                                | 5.26                 |                   |                          |                   |                          |                   |
| Zilpaterol                                                |                      |                   |                          |                   |                          |                   |
| <b>Sedatives</b>                                          |                      |                   |                          |                   |                          |                   |

| Group/Class - Pharmacologically active<br>Substance               | Retention time (min) |                   |                             |                   |                             |                   |
|-------------------------------------------------------------------|----------------------|-------------------|-----------------------------|-------------------|-----------------------------|-------------------|
|                                                                   | Method A             |                   | Method B*                   |                   |                             |                   |
|                                                                   | HESI <sup>+</sup>    | HESI <sup>-</sup> | Aqueous extract<br>(Tube 1) |                   | Organic extract<br>(Tube 2) |                   |
|                                                                   |                      |                   | HESI <sup>+</sup>           | HESI <sup>-</sup> | HESI <sup>+</sup>           | HESI <sup>-</sup> |
| Acepromazine                                                      | 8.88                 |                   | 10.39                       |                   |                             |                   |
| Azaperol                                                          | 7.04                 |                   | 6.12                        |                   |                             |                   |
| Azaperone                                                         | 7.44                 |                   | 7.10                        |                   |                             |                   |
| Carazolol                                                         | 7.58                 |                   | 9.19                        |                   |                             |                   |
| Chlorpromazine                                                    | 9.61                 |                   | 10.94                       |                   |                             |                   |
| <b>Prospecting sedatives</b>                                      |                      |                   |                             |                   |                             |                   |
| Xylazine                                                          | 7.01                 |                   | 6.51                        |                   |                             |                   |
| <b>Corants</b>                                                    |                      |                   |                             |                   |                             |                   |
| Gentian violet/Crystal violet                                     | 9.68 <sup>f</sup>    |                   | 11.87 <sup>f</sup>          |                   |                             |                   |
| Gentian violet/Crystal violet<br>metabolite (Leucocrystal Violet) |                      |                   | 10.13                       |                   |                             |                   |
| Malachite green                                                   | 9.12 <sup>f</sup>    |                   |                             |                   |                             |                   |
| Malachite green metabolite (Leucomalachite<br>green)              | 12.56                |                   | 12.17                       |                   |                             |                   |

Adducts: <sup>a</sup>[M+Na]<sup>+</sup>; <sup>b</sup>[(M-H-CH<sub>3</sub>OH)]<sup>+</sup>; <sup>c</sup>[(M+H<sub>2</sub>-CO)+H]<sup>+</sup>; <sup>d</sup>[M-H<sub>2</sub>O+H]<sup>+</sup>; <sup>e</sup>[M+2H]<sup>2+</sup>; <sup>f</sup>[M]<sup>+</sup>. Abbreviations: HESI<sup>+</sup>: heated electrospray ionization source operated in positive ion mode; HESI<sup>-</sup>: heated electrospray ionization source operated in negative ion mode; min: minute. \*In method B, the analytes marked in gray were analyzed by the organic extract.

**Figure S1.** General flowchart of the sample preparation procedure according to method A.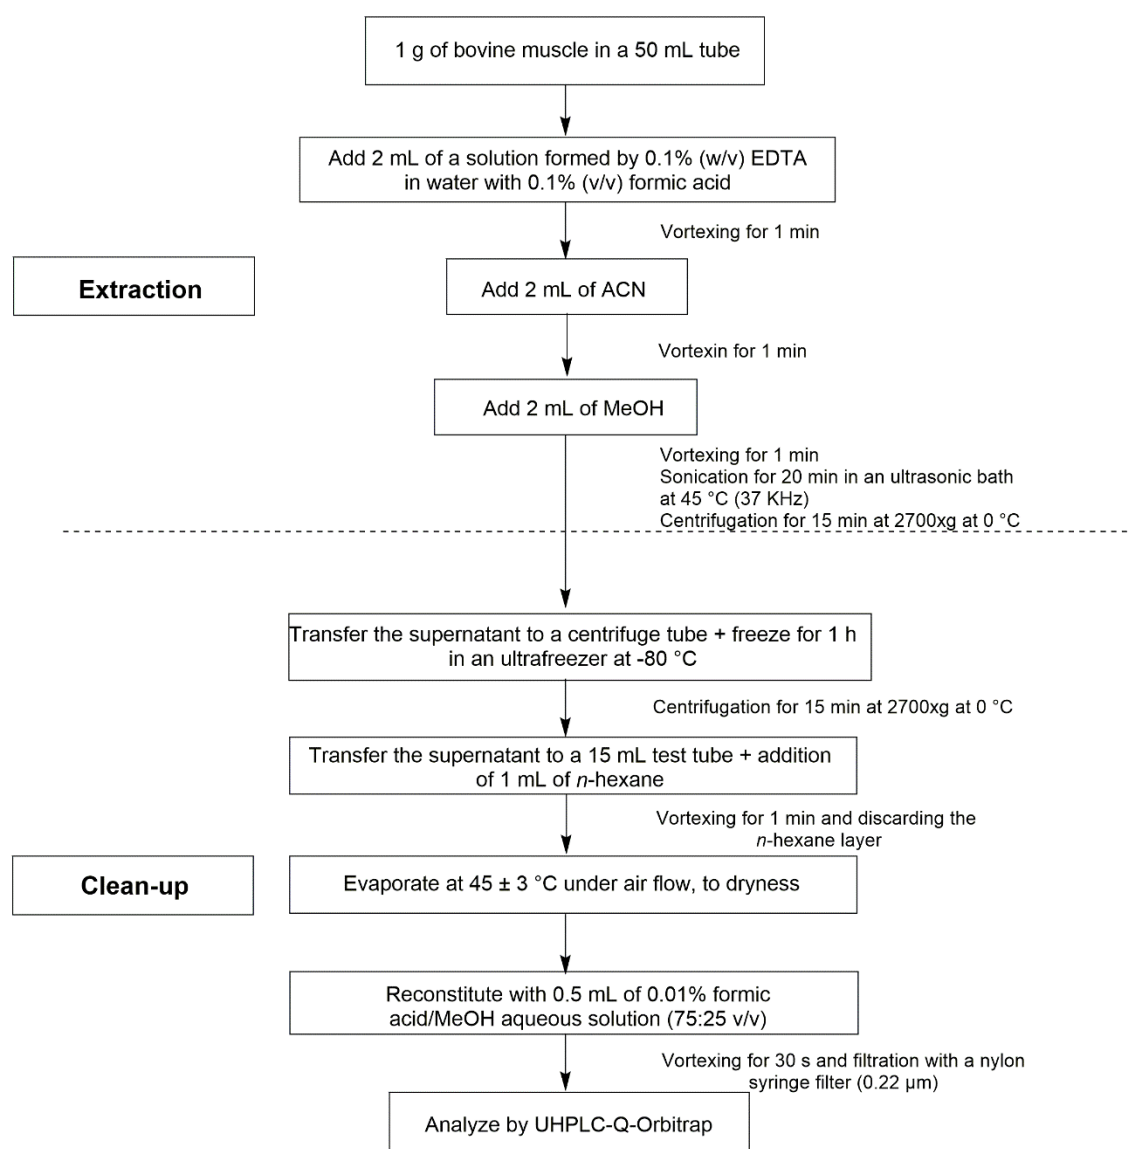

Prepared according to the modified method described by Dasenaki et al. [57].

**Figure S2.** General flowchart of the sample preparation procedure according to method B.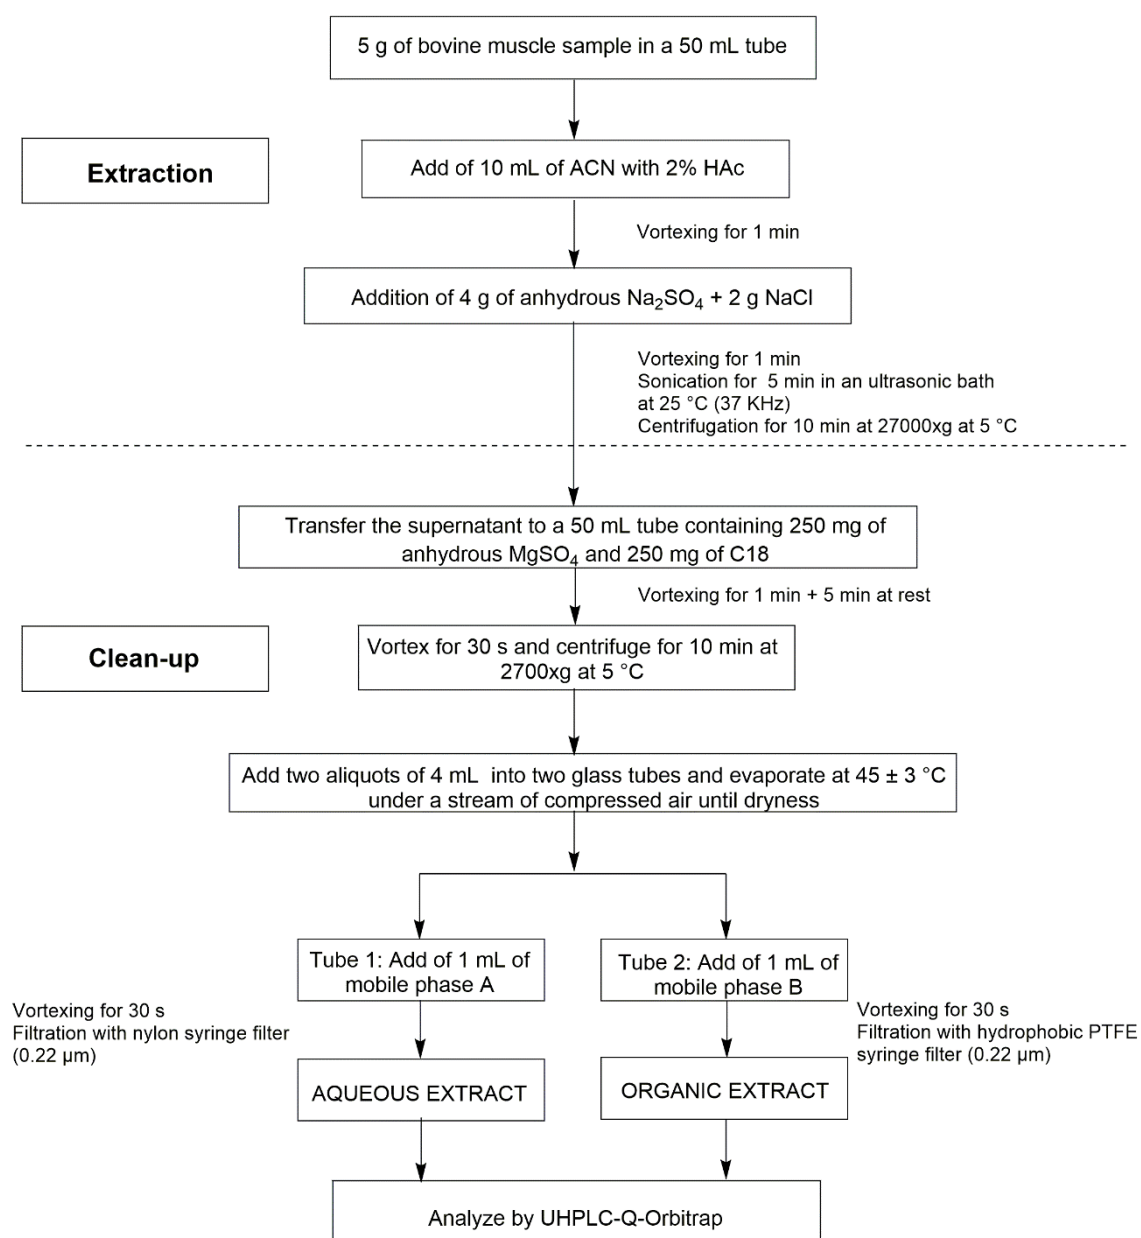

Prepared according to the modified method described by Silva et al. [22].

**Figure S3.** Analyte identification criteria [22,57].

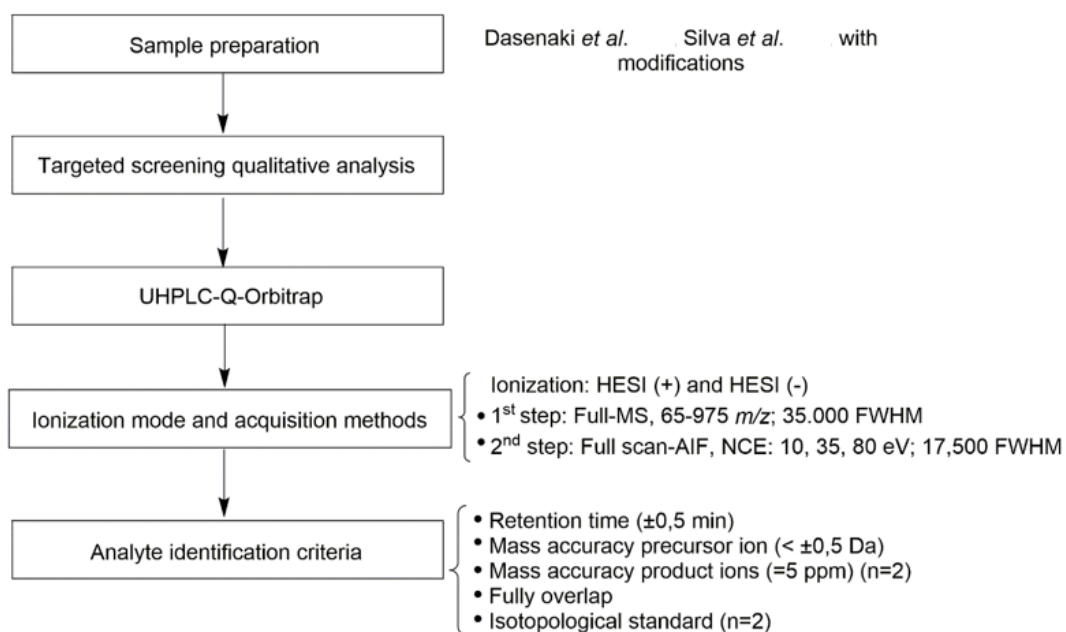



**Figure S4.** Examples of extracted mass traces of a spiked bovine muscle tissue at 2 MRL according to the established criteria for analyte identification.

### Trimethoprim $[M+H]^+$

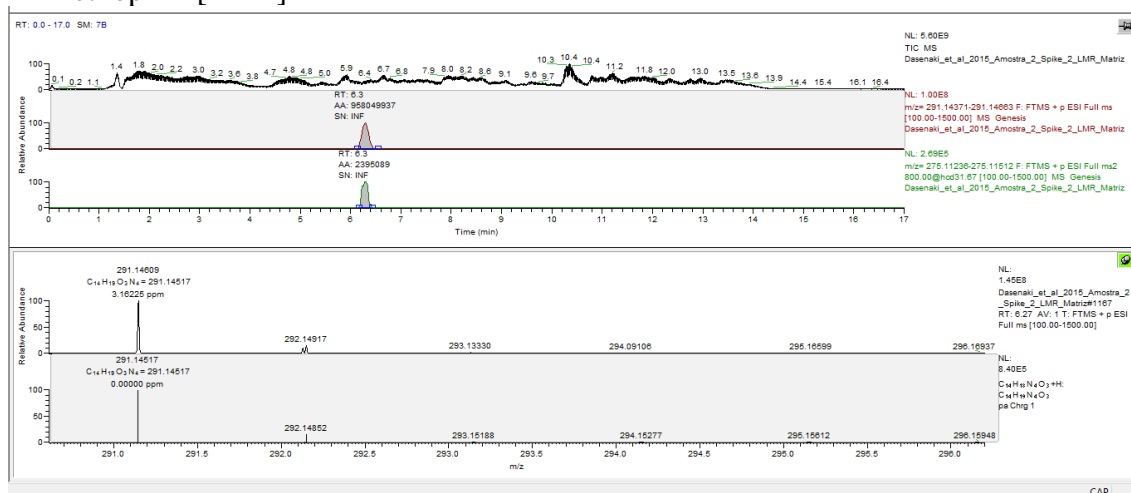

### Virginiamycin M<sub>1</sub> $[M+Na]^+$

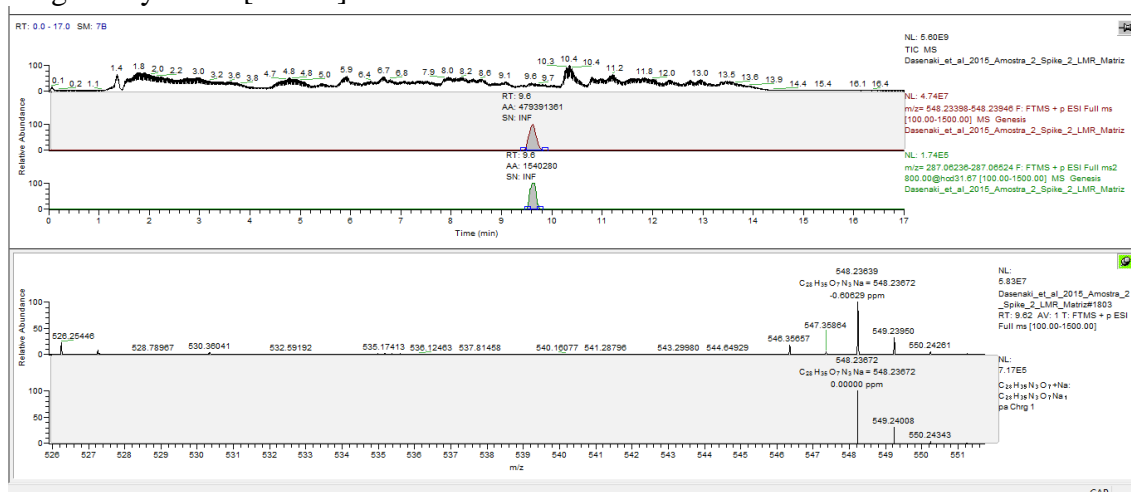

### Dichloroisoevernic acid $[M-H]^-$

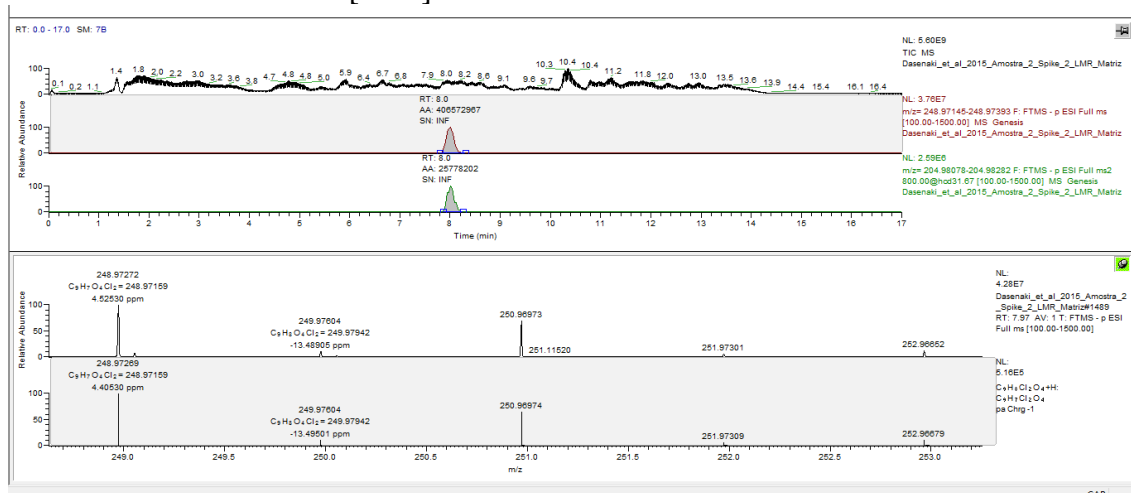

Supplement: s1 [file s1]
